# Supplementary material for: Prednisolone prescribing practices for dogs in Australia
Source: PubMed Central journal article supplement (PMC9974108; doi:10.1371/journal.pone.0282440), 2023-02-28

## Generalized Linear Models

### Notes

|                        |                                |                                                                                                                                                                                                                                                                                                                                                                                                                                                                    |
|------------------------|--------------------------------|--------------------------------------------------------------------------------------------------------------------------------------------------------------------------------------------------------------------------------------------------------------------------------------------------------------------------------------------------------------------------------------------------------------------------------------------------------------------|
| Output Created         |                                | 15-JUL-2022 17:20:55                                                                                                                                                                                                                                                                                                                                                                                                                                               |
| Comments               |                                |                                                                                                                                                                                                                                                                                                                                                                                                                                                                    |
| Input                  | Data                           | /Users/bonniepurcell/Desktop/SPSS /SPSS Whole data set correct sex.sav                                                                                                                                                                                                                                                                                                                                                                                             |
|                        | Active Dataset                 | DataSet1                                                                                                                                                                                                                                                                                                                                                                                                                                                           |
|                        | Filter                         | <none>                                                                                                                                                                                                                                                                                                                                                                                                                                                             |
|                        | Weight                         | <none>                                                                                                                                                                                                                                                                                                                                                                                                                                                             |
|                        | Split File                     | <none>                                                                                                                                                                                                                                                                                                                                                                                                                                                             |
|                        | N of Rows in Working Data File | 2000                                                                                                                                                                                                                                                                                                                                                                                                                                                               |
| Missing Value Handling | Definition of Missing          | User-defined missing values for factor, subject and within-subject variables are treated as missing.                                                                                                                                                                                                                                                                                                                                                               |
|                        | Cases Used                     | Statistics are based on cases with valid data for all variables in the model.                                                                                                                                                                                                                                                                                                                                                                                      |
| Weight Handling        |                                | not applicable                                                                                                                                                                                                                                                                                                                                                                                                                                                     |
| Syntax                 |                                | <pre> GENLIN mgm2 BY bodysystemrecoded Indicateddose (ORDER=ASCENDING) WITH Weight@ Agemonths /MODEL bodysystemrecoded Indicateddose Weight@ Agemonths INTERCEPT=YES DISTRIBUTION=NORMAL LINK=IDENTITY /CRITERIA SCALE=MLE COVB=MODEL PCONVERGE=1E-006 (ABSOLUTE) SINGULAR=1E-012 ANALYSISTYPE=3(LR) CILEVEL=95 CITYPE=WALD LIKELIHOOD=FULL /MISSING CLASSMISSING=EXCLUDE /PRINT CPS DESCRIPTIVES MODELINFO FIT SUMMARY SOLUTION /SAVE MEANPRED COOK RESID. </pre> |
| Resources              | Processor Time                 | 00:00:00.48                                                                                                                                                                                                                                                                                                                                                                                                                                                        |
|                        | Elapsed Time                   | 00:00:00.00                                                                                                                                                                                                                                                                                                                                                                                                                                                        |

### Notes

|                               |                                             |               |
|-------------------------------|---------------------------------------------|---------------|
| Variables Created or Modified | Predicted Value of the Mean of the Response | MeanPredicted |
|                               | Raw Residual                                | Residual      |
|                               | Cook's Distance                             | CooksDistance |

[DataSet1] /Users/bonniepurcell/Desktop/SPSS /SPSS Whole data set correct sex.sav

### Model Information

|                          |          |
|--------------------------|----------|
| Dependent Variable       | mg/m2    |
| Probability Distribution | Normal   |
| Link Function            | Identity |

### Case Processing Summary

|          | N    | Percent |
|----------|------|---------|
| Included | 1886 | 94.3%   |
| Excluded | 114  | 5.7%    |
| Total    | 2000 | 100.0%  |

### Categorical Variable Information

|        |                   | N     | Percent |        |
|--------|-------------------|-------|---------|--------|
| Factor | bodysystemrecoded | 2.00  | 24      | 1.3%   |
|        |                   | 3.00  | 80      | 4.2%   |
|        |                   | 4.00  | 22      | 1.2%   |
|        |                   | 5.00  | 61      | 3.2%   |
|        |                   | 6.00  | 33      | 1.7%   |
|        |                   | 7.00  | 10      | 0.5%   |
|        |                   | 8.00  | 7       | 0.4%   |
|        |                   | 10.00 | 6       | 0.3%   |
|        |                   | 11.00 | 1643    | 87.1%  |
|        |                   | Total | 1886    | 100.0% |
|        | Indicated dose    | 1     | 10      | 0.5%   |
|        |                   | 2     | 1796    | 95.2%  |
|        |                   | 3     | 80      | 4.2%   |
|        |                   | Total | 1886    | 100.0% |

### Continuous Variable Information

|                    |              | N    | Minimum    | Maximum    | Mean       |
|--------------------|--------------|------|------------|------------|------------|
| Dependent Variable | mg/m2        | 1886 | 1.09113813 | 106.655183 | 22.7675797 |
| Covariate          | Weight®      | 1886 | 1.56       | 90.00      | 19.3139    |
|                    | Age (months) | 1886 | 2          | 220        | 75.41      |

### Continuous Variable Information

|                    |              | Std. Deviation |
|--------------------|--------------|----------------|
| Dependent Variable | mg/m2        | 13.0648639     |
| Covariate          | Weight®      | 12.57011       |
|                    | Age (months) | 49.441         |

### Goodness of Fit<sup>a</sup>

|                                      | Value      | df   | Value/df |
|--------------------------------------|------------|------|----------|
| Deviance                             | 270631.591 | 1874 | 144.414  |
| Scaled Deviance                      | 1886.000   | 1874 |          |
| Pearson Chi-Square                   | 270631.591 | 1874 | 144.414  |
| Scaled Pearson Chi-Square            | 1886.000   | 1874 |          |
| Log Likelihood <sup>b</sup>          | -7359.339  |      |          |
| Akaike's Information Criterion (AIC) | 14744.678  |      |          |
| Finite Sample Corrected AIC (AICC)   | 14744.873  |      |          |
| Bayesian Information Criterion (BIC) | 14816.727  |      |          |
| Consistent AIC (CAIC)                | 14829.727  |      |          |

Dependent Variable: mg/m2

Model: (Intercept), bodysystemrecoded, Indicated dose, Weight®, Age (months)<sup>a</sup>

- a. Information criteria are in smaller-is-better form.
- b. The full log likelihood function is displayed and used in computing information criteria.

### Omnibus Test<sup>a</sup>

| Likelihood Ratio Chi-Square | df | Sig. |
|-----------------------------|----|------|
| 326.320                     | 11 | .000 |

Dependent Variable: mg/m2

Model: (Intercept), bodysystemrecoded, Indicated dose, Weight®, Age (months)<sup>a</sup>

- a. Compares the fitted model against the intercept-only...

### Tests of Model Effects

| Source            | Likelihood Ratio Chi-Square | Type III |       |
|-------------------|-----------------------------|----------|-------|
|                   |                             | df       | Sig.  |
| (Intercept)       | 393.523                     | 1        | .000  |
| bodysystemrecoded | 24.993                      | 7        | <.001 |
| Indicated dose    | 37.137                      | 1        | <.001 |
| Weight®           | 138.359                     | 1        | .000  |
| Age (months)      | 11.390                      | 1        | <.001 |

Dependent Variable: mg/m2

Model: (Intercept), bodysystemrecoded, Indicated dose, Weight®, Age (months)

### Parameter Estimates

| Parameter                 | B                    | Std. Error | 95% Wald Confidence Interval |         | Hypothesis Test |
|---------------------------|----------------------|------------|------------------------------|---------|-----------------|
|                           |                      |            | Lower                        | Upper   | Wald Chi-Square |
| (Intercept)               | 29.489               | 1.9592     | 25.649                       | 33.329  | 226.556         |
| [bodysystemrecoded=2.00]  | 2.466                | 2.4648     | -2.365                       | 7.297   | 1.001           |
| [bodysystemrecoded=3.00]  | 1.657                | 1.4181     | -1.122                       | 4.437   | 1.366           |
| [bodysystemrecoded=4.00]  | 4.776                | 2.5896     | -.299                        | 9.852   | 3.402           |
| [bodysystemrecoded=5.00]  | 4.556                | 1.6540     | 1.315                        | 7.798   | 7.589           |
| [bodysystemrecoded=6.00]  | 11.231               | 2.7617     | 5.818                        | 16.644  | 16.538          |
| [bodysystemrecoded=7.00]  | -24.155              | 4.2257     | -32.438                      | -15.873 | 32.676          |
| [bodysystemrecoded=8.00]  | 4.453                | 4.6550     | -4.671                       | 13.576  | .915            |
| [bodysystemrecoded=10.00] | 3.178                | 4.9032     | -6.432                       | 12.788  | .420            |
| [bodysystemrecoded=11.00] | 0 <sup>a</sup>       | .          | .                            | .       | .               |
| [Indicated dose=1]        | 0 <sup>a</sup>       | .          | .                            | .       | .               |
| [Indicated dose=2]        | -11.390              | 1.8598     | -15.035                      | -7.744  | 37.505          |
| [Indicated dose=3]        | 0 <sup>a</sup>       | .          | .                            | .       | .               |
| Weight@                   | .271                 | .0226      | .227                         | .316    | 143.561         |
| Age (months)              | -.020                | .0059      | -.032                        | -.008   | 11.424          |
| (Scale)                   | 143.495 <sup>b</sup> | 4.6728     | 134.623                      | 152.952 |                 |

## Parameter Estimates

### Hypothesis Test

| Parameter                 | df | Sig.  |
|---------------------------|----|-------|
| (Intercept)               | 1  | .000  |
| [bodysystemrecoded=2.00]  | 1  | .317  |
| [bodysystemrecoded=3.00]  | 1  | .243  |
| [bodysystemrecoded=4.00]  | 1  | .065  |
| [bodysystemrecoded=5.00]  | 1  | .006  |
| [bodysystemrecoded=6.00]  | 1  | <.001 |
| [bodysystemrecoded=7.00]  | 1  | <.001 |
| [bodysystemrecoded=8.00]  | 1  | .339  |
| [bodysystemrecoded=10.00] | 1  | .517  |
| [bodysystemrecoded=11.00] | .  | .     |
| [Indicated dose=1]        | .  | .     |
| [Indicated dose=2]        | 1  | <.001 |
| [Indicated dose=3]        | .  | .     |
| Weight@                   | 1  | .000  |
| Age (months)              | 1  | <.001 |
| (Scale)                   |    |       |

Dependent Variable: mg/m2

Model: (Intercept), bodysystemrecoded, Indicated dose, Weight@, Age (months)

- a. Set to zero because this parameter is redundant.
- b. Maximum likelihood estimate.

## GGraph

### Notes

|                |                                                                                                                                                                                                                                                                                                                                                                                                                                                                                                                                |                                                                        |
|----------------|--------------------------------------------------------------------------------------------------------------------------------------------------------------------------------------------------------------------------------------------------------------------------------------------------------------------------------------------------------------------------------------------------------------------------------------------------------------------------------------------------------------------------------|------------------------------------------------------------------------|
| Output Created |                                                                                                                                                                                                                                                                                                                                                                                                                                                                                                                                | 15-JUL-2022 17:21:35                                                   |
| Comments       |                                                                                                                                                                                                                                                                                                                                                                                                                                                                                                                                |                                                                        |
| Input          | Data                                                                                                                                                                                                                                                                                                                                                                                                                                                                                                                           | /Users/bonniepurcell/D/sktop/SPSS /SPSS Whole data set correct sex.sav |
|                | Active Dataset                                                                                                                                                                                                                                                                                                                                                                                                                                                                                                                 | DataSet1                                                               |
|                | Filter                                                                                                                                                                                                                                                                                                                                                                                                                                                                                                                         | <none>                                                                 |
|                | Weight                                                                                                                                                                                                                                                                                                                                                                                                                                                                                                                         | <none>                                                                 |
|                | Split File                                                                                                                                                                                                                                                                                                                                                                                                                                                                                                                     | <none>                                                                 |
|                | N of Rows in Working Data File                                                                                                                                                                                                                                                                                                                                                                                                                                                                                                 | 2000                                                                   |
| Syntax         | <pre> GGRAPH   /GRAPHDATASET   NAME="graphdataset"   VARIABLES=Residual   MISSING=LISTWISE   REPORTMISSING=NO   /GRAPHSPEC   SOURCE=INLINE. BEGIN GPL   SOURCE: s=userSource (id("graphdataset"))   DATA: Residual=col (source(s), name ("Residual"))   GUIDE: axis(dim(1), label("Raw Residual"))   GUIDE: axis(dim(2), label("Frequency"))   GUIDE: text.title(label ("Simple Histogram of Raw Residual"))   ELEMENT: interval (position(summary.count (bin.rect(Residual))), shape.interior(shape. square)) END GPL. </pre> |                                                                        |
| Resources      | Processor Time                                                                                                                                                                                                                                                                                                                                                                                                                                                                                                                 | 00:00:02.56                                                            |
|                | Elapsed Time                                                                                                                                                                                                                                                                                                                                                                                                                                                                                                                   | 00:00:03.00                                                            |

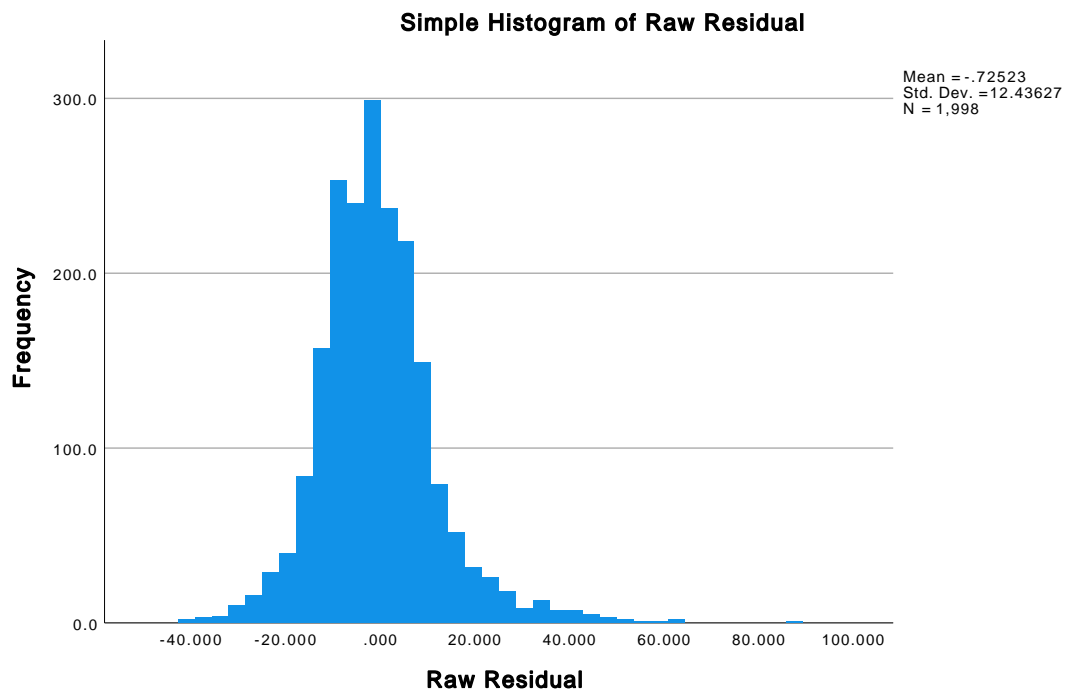

## GGraph

### Notes

|                |                                |                                                                        |
|----------------|--------------------------------|------------------------------------------------------------------------|
| Output Created |                                | 15-JUL-2022 17:22:45                                                   |
| Comments       |                                |                                                                        |
| Input          | Data                           | /Users/bonniepurcell/Desktop/SPSS /SPSS Whole data set correct sex.sav |
|                | Active Dataset                 | DataSet1                                                               |
|                | Filter                         | <none>                                                                 |
|                | Weight                         | <none>                                                                 |
|                | Split File                     | <none>                                                                 |
|                | N of Rows in Working Data File | 2000                                                                   |

## Notes

Syntax

```
GGRAPH
/GRAPHDATASET
NAME="graphdataset"
VARIABLES=CooksDistanc
e mgm2
MISSING=LISTWISE
REPORTMISSING=NO
/GRAPHSPEC
SOURCE=INLINE
/FITLINE TOTAL=NO
SUBGROUP=NO.
BEGIN GPL
SOURCE: s=userSource
(id("graphdataset"))
DATA:
CooksDistance=col
(source(s), name
("CooksDistance"))
DATA: mgm2=col
(source(s), name
("mgm2"))
GUIDE: axis(dim(1),
label("Cook's Distance"))
GUIDE: axis(dim(2),
label("mg/m2"))
GUIDE: text.title(label
("Scatter Plot of mg/m2
by Cook's Distance"))
ELEMENT: point(position
(CooksDistance*mgm2))
END GPL.
```

|           |                |             |
|-----------|----------------|-------------|
| Resources | Processor Time | 00:00:00.19 |
|           | Elapsed Time   | 00:00:00.00 |

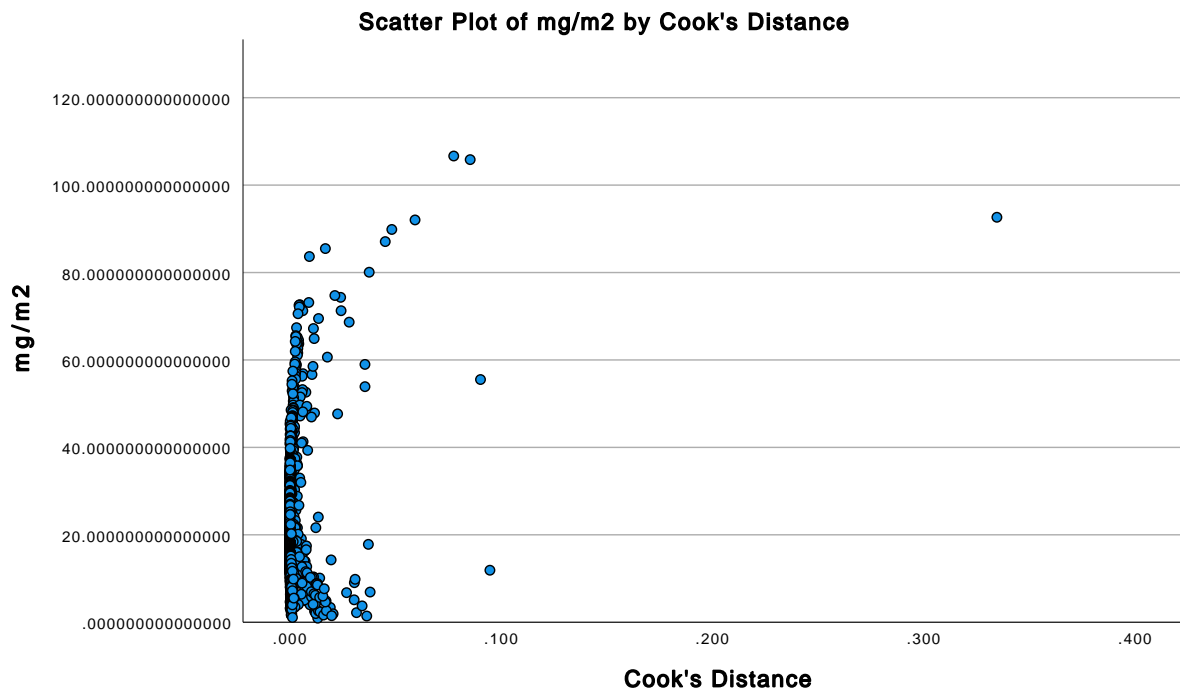

GGraph



### Notes

|                |                                                                                                                                                                                                                                                                                                                                                                                                                                                                                                                                                                                                                                                                 |                                                                        |
|----------------|-----------------------------------------------------------------------------------------------------------------------------------------------------------------------------------------------------------------------------------------------------------------------------------------------------------------------------------------------------------------------------------------------------------------------------------------------------------------------------------------------------------------------------------------------------------------------------------------------------------------------------------------------------------------|------------------------------------------------------------------------|
| Output Created |                                                                                                                                                                                                                                                                                                                                                                                                                                                                                                                                                                                                                                                                 | 15-JUL-2022 17:23:28                                                   |
| Comments       |                                                                                                                                                                                                                                                                                                                                                                                                                                                                                                                                                                                                                                                                 |                                                                        |
| Input          | Data                                                                                                                                                                                                                                                                                                                                                                                                                                                                                                                                                                                                                                                            | /Users/bonniepurcell/Desktop/SPSS /SPSS Whole data set correct sex.sav |
|                | Active Dataset                                                                                                                                                                                                                                                                                                                                                                                                                                                                                                                                                                                                                                                  | DataSet1                                                               |
|                | Filter                                                                                                                                                                                                                                                                                                                                                                                                                                                                                                                                                                                                                                                          | <none>                                                                 |
|                | Weight                                                                                                                                                                                                                                                                                                                                                                                                                                                                                                                                                                                                                                                          | <none>                                                                 |
|                | Split File                                                                                                                                                                                                                                                                                                                                                                                                                                                                                                                                                                                                                                                      | <none>                                                                 |
|                | N of Rows in Working Data File                                                                                                                                                                                                                                                                                                                                                                                                                                                                                                                                                                                                                                  | 2000                                                                   |
| Syntax         | <pre> GGRAPH   /GRAPHDATASET   NAME="graphdataset"   VARIABLES=mgm2   CooksDistance   MISSING=LISTWISE   REPORTMISSING=NO   /GRAPHSPEC   SOURCE=INLINE   /FITLINE TOTAL=NO   SUBGROUP=NO.   BEGIN GPL     SOURCE: s=userSource     (id("graphdataset"))     DATA: mgm2=col     (source(s), name     ("mgm2"))     DATA:     CooksDistance=col     (source(s), name     ("CooksDistance"))     GUIDE: axis(dim(1),     label("mg/m2"))     GUIDE: axis(dim(2),     label("Cook's Distance"))     GUIDE: text.title(label     ("Scatter Plot of Cook's     Distance by mg/m2"))     ELEMENT: point(position     (mgm2*CooksDistance))   END GPL.           </pre> |                                                                        |
| Resources      | Processor Time                                                                                                                                                                                                                                                                                                                                                                                                                                                                                                                                                                                                                                                  | 00:00:00.15                                                            |
|                | Elapsed Time                                                                                                                                                                                                                                                                                                                                                                                                                                                                                                                                                                                                                                                    | 00:00:00.00                                                            |

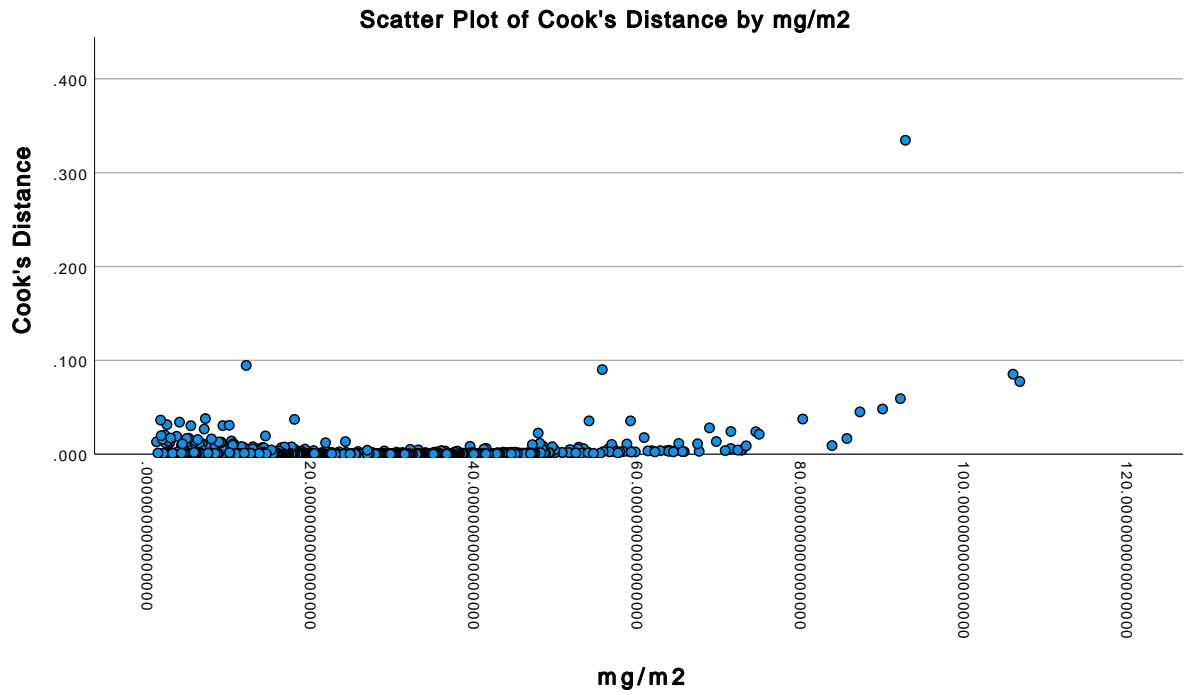

## GGraph

### Notes

|                |                                |                                                                        |
|----------------|--------------------------------|------------------------------------------------------------------------|
| Output Created |                                | 15-JUL-2022 17:24:12                                                   |
| Comments       |                                |                                                                        |
| Input          | Data                           | /Users/bonniepurcell/Desktop/SPSS /SPSS Whole data set correct sex.sav |
|                | Active Dataset                 | DataSet1                                                               |
|                | Filter                         | <none>                                                                 |
|                | Weight                         | <none>                                                                 |
|                | Split File                     | <none>                                                                 |
|                | N of Rows in Working Data File | 2000                                                                   |

## Notes

|           |                                                                                                                                                                                                                                                                                                                                                                                                                                                                                                                                                                                   |             |
|-----------|-----------------------------------------------------------------------------------------------------------------------------------------------------------------------------------------------------------------------------------------------------------------------------------------------------------------------------------------------------------------------------------------------------------------------------------------------------------------------------------------------------------------------------------------------------------------------------------|-------------|
| Syntax    | <pre> GGRAPH /GRAPHDATASET NAME="graphdataset" VARIABLES=mgm2 MeanPredicted MISSING=LISTWISE REPORTMISSING=NO /GRAPHSPEC SOURCE=INLINE /FITLINE TOTAL=NO. BEGIN GPL SOURCE: s=userSource (id("graphdataset")) DATA: mgm2=col (source(s), name ("mgm2")) DATA: MeanPredicted=col (source(s), name ("MeanPredicted")) GUIDE: axis(dim(1), label("mg/m2")) GUIDE: axis(dim(2), label("Predicted Value of Mean of Response")) GUIDE: text.title(label ("Scatter Plot of Predicted Value of Mean of Response by mg/m2")) ELEMENT: point(position (mgm2*MeanPredicted)) END GPL. </pre> |             |
| Resources | Processor Time                                                                                                                                                                                                                                                                                                                                                                                                                                                                                                                                                                    | 00:00:00.15 |
|           | Elapsed Time                                                                                                                                                                                                                                                                                                                                                                                                                                                                                                                                                                      | 00:00:00.00 |

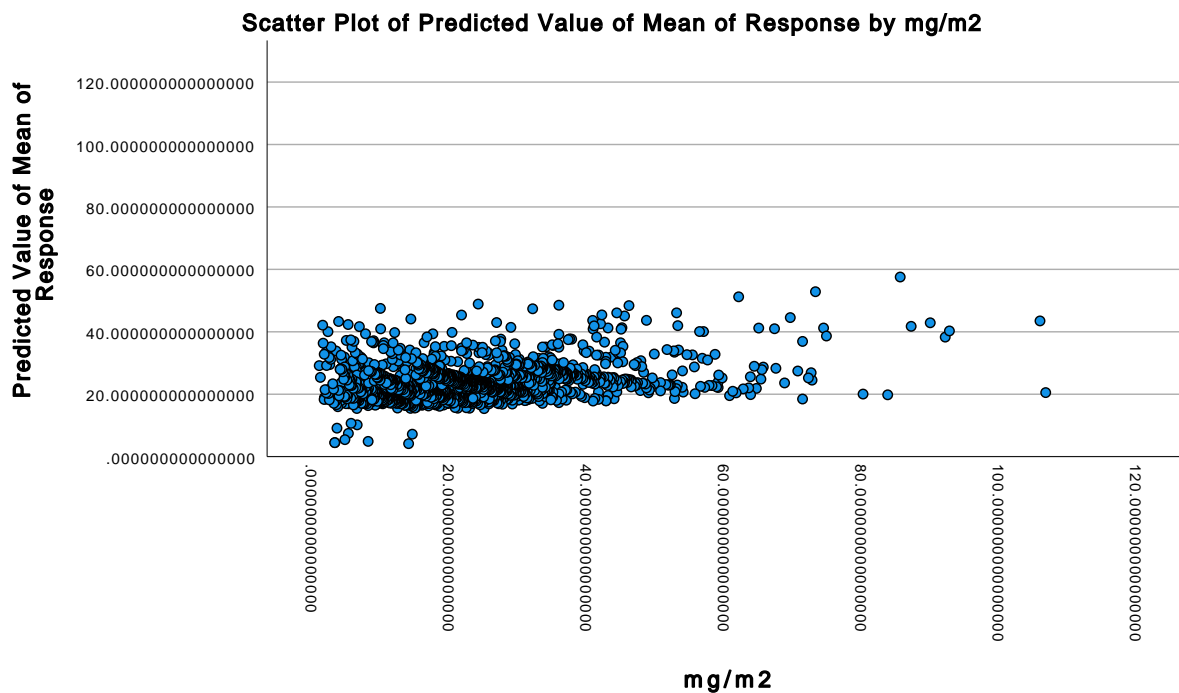

## Generalized Linear Models

### Notes

|                        |                                |                                                                                                                                                                                                                                                                                                                                                                                                                                                                    |
|------------------------|--------------------------------|--------------------------------------------------------------------------------------------------------------------------------------------------------------------------------------------------------------------------------------------------------------------------------------------------------------------------------------------------------------------------------------------------------------------------------------------------------------------|
| Output Created         |                                | 15-JUL-2022 17:29:11                                                                                                                                                                                                                                                                                                                                                                                                                                               |
| Comments               |                                |                                                                                                                                                                                                                                                                                                                                                                                                                                                                    |
| Input                  | Data                           | /Users/bonniepurcell/Desktop/SPSS /SPSS Whole data set correct sex.sav                                                                                                                                                                                                                                                                                                                                                                                             |
|                        | Active Dataset                 | DataSet1                                                                                                                                                                                                                                                                                                                                                                                                                                                           |
|                        | Filter                         | CooksDistance <= 0.05 (FILTER)                                                                                                                                                                                                                                                                                                                                                                                                                                     |
|                        | Weight                         | <none>                                                                                                                                                                                                                                                                                                                                                                                                                                                             |
|                        | Split File                     | <none>                                                                                                                                                                                                                                                                                                                                                                                                                                                             |
|                        | N of Rows in Working Data File | 1992                                                                                                                                                                                                                                                                                                                                                                                                                                                               |
| Missing Value Handling | Definition of Missing          | User-defined missing values for factor, subject and within-subject variables are treated as missing.                                                                                                                                                                                                                                                                                                                                                               |
|                        | Cases Used                     | Statistics are based on cases with valid data for all variables in the model.                                                                                                                                                                                                                                                                                                                                                                                      |
| Weight Handling        |                                | not applicable                                                                                                                                                                                                                                                                                                                                                                                                                                                     |
| Syntax                 |                                | <pre> GENLIN mgm2 BY bodysystemrecoded Indicateddose (ORDER=ASCENDING) WITH Weight@ Agemonths /MODEL bodysystemrecoded Indicateddose Weight@ Agemonths INTERCEPT=YES DISTRIBUTION=NORMAL LINK=IDENTITY /CRITERIA SCALE=MLE COVB=MODEL PCONVERGE=1E-006 (ABSOLUTE) SINGULAR=1E-012 ANALYSISTYPE=3(LR) CILEVEL=95 CITYPE=WALD LIKELIHOOD=FULL /MISSING CLASSMISSING=EXCLUDE /PRINT CPS DESCRIPTIVES MODELINFO FIT SUMMARY SOLUTION /SAVE MEANPRED COOK RESID. </pre> |
| Resources              | Processor Time                 | 00:00:00.43                                                                                                                                                                                                                                                                                                                                                                                                                                                        |
|                        | Elapsed Time                   | 00:00:00.00                                                                                                                                                                                                                                                                                                                                                                                                                                                        |

### Notes

|                               |                                             |                 |
|-------------------------------|---------------------------------------------|-----------------|
| Variables Created or Modified | Predicted Value of the Mean of the Response | MeanPredicted_1 |
|                               | Raw Residual                                | Residual_1      |
|                               | Cook's Distance                             | CooksDistance_1 |

### Model Information

|                          |          |
|--------------------------|----------|
| Dependent Variable       | mg/m2    |
| Probability Distribution | Normal   |
| Link Function            | Identity |

### Case Processing Summary

|          | N    | Percent |
|----------|------|---------|
| Included | 1880 | 94.4%   |
| Excluded | 112  | 5.6%    |
| Total    | 1992 | 100.0%  |

### Categorical Variable Information

|        |                   | N     | Percent |        |
|--------|-------------------|-------|---------|--------|
| Factor | bodysystemrecoded | 2.00  | 24      | 1.3%   |
|        |                   | 3.00  | 79      | 4.2%   |
|        |                   | 4.00  | 22      | 1.2%   |
|        |                   | 5.00  | 60      | 3.2%   |
|        |                   | 6.00  | 32      | 1.7%   |
|        |                   | 7.00  | 10      | 0.5%   |
|        |                   | 8.00  | 4       | 0.2%   |
|        |                   | 10.00 | 6       | 0.3%   |
|        |                   | 11.00 | 1643    | 87.4%  |
|        |                   | Total | 1880    | 100.0% |
|        | Indicated dose    |       | 1       | 10     |
|        |                   | 2     | 1794    | 95.4%  |
|        |                   | 3     | 76      | 4.0%   |
|        |                   | Total | 1880    | 100.0% |

### Continuous Variable Information

|                    |              | N    | Minimum    | Maximum    | Mean       |
|--------------------|--------------|------|------------|------------|------------|
| Dependent Variable | mg/m2        | 1880 | 1.09113813 | 89.8525891 | 22.5931278 |
| Covariate          | Weight®      | 1880 | 1.56       | 90.00      | 19.3097    |
|                    | Age (months) | 1880 | 2          | 220        | 75.46      |

### Continuous Variable Information

|                    |              | Std. Deviation |
|--------------------|--------------|----------------|
| Dependent Variable | mg/m2        | 12.5699326     |
| Covariate          | Weight®      | 12.58103       |
|                    | Age (months) | 49.421         |

### Goodness of Fit<sup>a</sup>

|                                      | Value      | df   | Value/df |
|--------------------------------------|------------|------|----------|
| Deviance                             | 251209.031 | 1868 | 134.480  |
| Scaled Deviance                      | 1880.000   | 1868 |          |
| Pearson Chi-Square                   | 251209.031 | 1868 | 134.480  |
| Scaled Pearson Chi-Square            | 1880.000   | 1868 |          |
| Log Likelihood <sup>b</sup>          | -7268.917  |      |          |
| Akaike's Information Criterion (AIC) | 14563.834  |      |          |
| Finite Sample Corrected AIC (AICC)   | 14564.030  |      |          |
| Bayesian Information Criterion (BIC) | 14635.842  |      |          |
| Consistent AIC (CAIC)                | 14648.842  |      |          |

Dependent Variable: mg/m2

Model: (Intercept), bodysystemrecoded, Indicated dose, Weight®, Age (months)<sup>a</sup>

- a. Information criteria are in smaller-is-better form.
- b. The full log likelihood function is displayed and used in computing information criteria.

### Omnibus Test<sup>a</sup>

| Likelihood Ratio Chi-Square | df | Sig. |
|-----------------------------|----|------|
| 314.091                     | 11 | .000 |

Dependent Variable: mg/m2

Model: (Intercept), bodysystemrecoded, Indicated dose, Weight®, Age (months)<sup>a</sup>

- a. Compares the fitted model against the intercept-only...

### Tests of Model Effects

| Source            | Likelihood Ratio Chi-Square | Type III |       |
|-------------------|-----------------------------|----------|-------|
|                   |                             | df       | Sig.  |
| (Intercept)       | 335.722                     | 1        | .000  |
| bodysystemrecoded | 24.205                      | 7        | .001  |
| Indicated dose    | 32.280                      | 1        | <.001 |
| Weight®           | 149.497                     | 1        | .000  |
| Age (months)      | 8.884                       | 1        | .003  |

Dependent Variable: mg/m2

Model: (Intercept), bodysystemrecoded, Indicated dose, Weight®, Age (months)

### Parameter Estimates

| Parameter                 | B                    | Std. Error | 95% Wald Confidence Interval |         | Hypothesis Test |
|---------------------------|----------------------|------------|------------------------------|---------|-----------------|
|                           |                      |            | Lower                        | Upper   | Wald Chi-Square |
| (Intercept)               | 28.277               | 1.9223     | 24.510                       | 32.045  | 216.400         |
| [bodysystemrecoded=2.00]  | 2.405                | 2.3786     | -2.257                       | 7.067   | 1.023           |
| [bodysystemrecoded=3.00]  | .399                 | 1.3768     | -2.299                       | 3.098   | .084            |
| [bodysystemrecoded=4.00]  | 4.630                | 2.4990     | -.268                        | 9.528   | 3.433           |
| [bodysystemrecoded=5.00]  | 3.801                | 1.6038     | .658                         | 6.944   | 5.617           |
| [bodysystemrecoded=6.00]  | 10.132               | 2.7036     | 4.833                        | 15.430  | 14.044          |
| [bodysystemrecoded=7.00]  | -23.279              | 4.0884     | -31.292                      | -15.266 | 32.421          |
| [bodysystemrecoded=8.00]  | -7.949               | 5.8549     | -19.425                      | 3.526   | 1.843           |
| [bodysystemrecoded=10.00] | 3.255                | 4.7315     | -6.019                       | 12.528  | .473            |
| [bodysystemrecoded=11.00] | 0 <sup>a</sup>       | .          | .                            | .       | .               |
| [Indicated dose=1]        | 0 <sup>a</sup>       | .          | .                            | .       | .               |
| [Indicated dose=2]        | -10.396              | 1.8219     | -13.967                      | -6.825  | 32.559          |
| [Indicated dose=3]        | 0 <sup>a</sup>       | .          | .                            | .       | .               |
| Weight@                   | .273                 | .0219      | .230                         | .315    | 155.602         |
| Age (months)              | -.017                | .0057      | -.028                        | -.006   | 8.905           |
| (Scale)                   | 133.622 <sup>b</sup> | 4.3583     | 125.347                      | 142.443 |                 |

## Parameter Estimates

| Parameter                 | Hypothesis Test |       |
|---------------------------|-----------------|-------|
|                           | df              | Sig.  |
| (Intercept)               | 1               | .000  |
| [bodysystemrecoded=2.00]  | 1               | .312  |
| [bodysystemrecoded=3.00]  | 1               | .772  |
| [bodysystemrecoded=4.00]  | 1               | .064  |
| [bodysystemrecoded=5.00]  | 1               | .018  |
| [bodysystemrecoded=6.00]  | 1               | <.001 |
| [bodysystemrecoded=7.00]  | 1               | <.001 |
| [bodysystemrecoded=8.00]  | 1               | .175  |
| [bodysystemrecoded=10.00] | 1               | .492  |
| [bodysystemrecoded=11.00] | .               | .     |
| [Indicated dose=1]        | .               | .     |
| [Indicated dose=2]        | 1               | <.001 |
| [Indicated dose=3]        | .               | .     |
| Weight@                   | 1               | .000  |
| Age (months)              | 1               | .003  |
| (Scale)                   |                 |       |

Dependent Variable: mg/m2

Model: (Intercept), bodysystemrecoded, Indicated dose, Weight@, Age (months)

- a. Set to zero because this parameter is redundant.
- b. Maximum likelihood estimate.

## GGraph



### Notes

|                |                                                                                                                                                                                                                                                                                                                                                                                                                                                                                                           |                                                                        |
|----------------|-----------------------------------------------------------------------------------------------------------------------------------------------------------------------------------------------------------------------------------------------------------------------------------------------------------------------------------------------------------------------------------------------------------------------------------------------------------------------------------------------------------|------------------------------------------------------------------------|
| Output Created |                                                                                                                                                                                                                                                                                                                                                                                                                                                                                                           | 15-JUL-2022 17:30:04                                                   |
| Comments       |                                                                                                                                                                                                                                                                                                                                                                                                                                                                                                           |                                                                        |
| Input          | Data                                                                                                                                                                                                                                                                                                                                                                                                                                                                                                      | /Users/bonniepurcell/Desktop/SPSS /SPSS Whole data set correct sex.sav |
|                | Active Dataset                                                                                                                                                                                                                                                                                                                                                                                                                                                                                            | DataSet1                                                               |
|                | Filter                                                                                                                                                                                                                                                                                                                                                                                                                                                                                                    | CooksDistance <= 0.05 (FILTER)                                         |
|                | Weight                                                                                                                                                                                                                                                                                                                                                                                                                                                                                                    | <none>                                                                 |
|                | Split File                                                                                                                                                                                                                                                                                                                                                                                                                                                                                                | <none>                                                                 |
|                | N of Rows in Working Data File                                                                                                                                                                                                                                                                                                                                                                                                                                                                            | 1992                                                                   |
| Syntax         | <pre>GGRAPH /GRAPHDATASET NAME="graphdataset" VARIABLES=Residual_1 MISSING=LISTWISE REPORTMISSING=NO /GRAPHSPEC SOURCE=INLINE. BEGIN GPL SOURCE: s=userSource (id("graphdataset")) DATA: Residual_1=col (source(s), name ("Residual_1")) GUIDE: axis(dim(1), label("Raw Residual")) GUIDE: axis(dim(2), label("Frequency")) GUIDE: text.title(label ("Simple Histogram of Raw Residual")) ELEMENT: interval (position(summary.count (bin.rect(Residual_1)), shape.interior(shape. square)) END GPL.</pre> |                                                                        |
| Resources      | Processor Time                                                                                                                                                                                                                                                                                                                                                                                                                                                                                            | 00:00:00.16                                                            |
|                | Elapsed Time                                                                                                                                                                                                                                                                                                                                                                                                                                                                                              | 00:00:00.00                                                            |

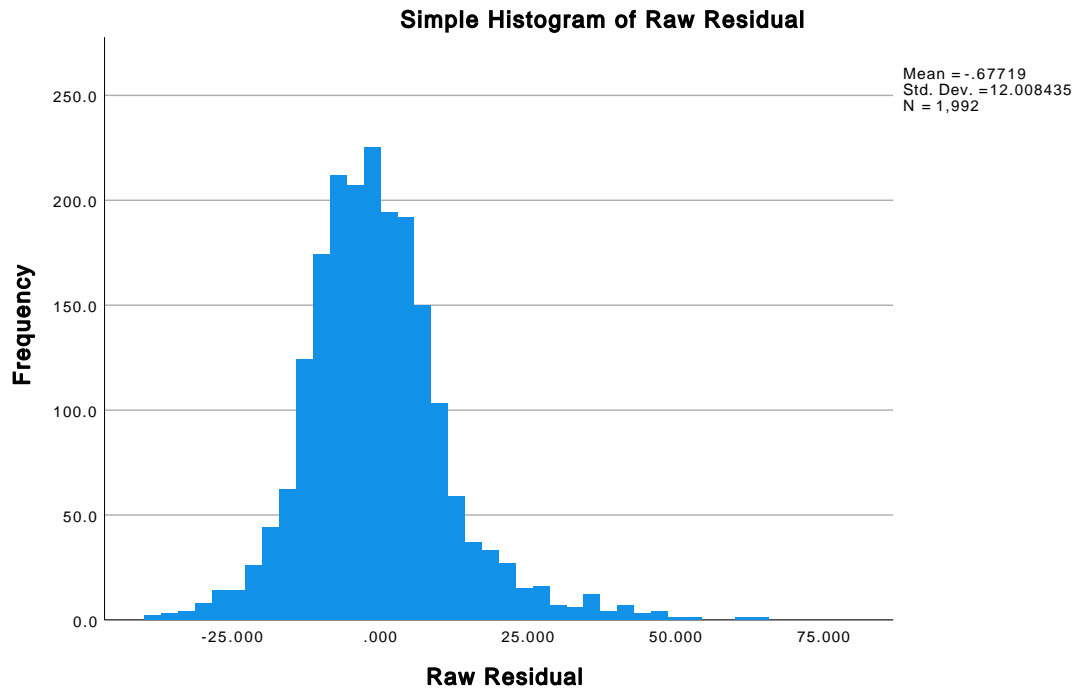

## GGraph

### Notes

|                |                                |                                                                        |
|----------------|--------------------------------|------------------------------------------------------------------------|
| Output Created |                                | 15-JUL-2022 17:31:30                                                   |
| Comments       |                                |                                                                        |
| Input          | Data                           | /Users/bonniepurcell/Desktop/SPSS /SPSS Whole data set correct sex.sav |
|                | Active Dataset                 | DataSet1                                                               |
|                | Filter                         | CooksDistance <= 0.05 (FILTER)                                         |
|                | Weight                         | <none>                                                                 |
|                | Split File                     | <none>                                                                 |
|                | N of Rows in Working Data File | 1992                                                                   |

## Notes

|           |                                                                                                                                                                                                                                                                                                                                                                                                                                                                                                                                                                                                        |             |
|-----------|--------------------------------------------------------------------------------------------------------------------------------------------------------------------------------------------------------------------------------------------------------------------------------------------------------------------------------------------------------------------------------------------------------------------------------------------------------------------------------------------------------------------------------------------------------------------------------------------------------|-------------|
| Syntax    | <pre> GGRAPH /GRAPHDATASET NAME="graphdataset" VARIABLES=mgm2 MeanPredicted_1 MISSING=LISTWISE REPORTMISSING=NO /GRAPHSPEC SOURCE=INLINE /FITLINE TOTAL=NO SUBGROUP=NO. BEGIN GPL SOURCE: s=userSource (id("graphdataset")) DATA: mgm2=col (source(s), name ("mgm2")) DATA: MeanPredicted_1=col (source(s), name ("MeanPredicted_1")) GUIDE: axis(dim(1), label("mg/m2")) GUIDE: axis(dim(2), label("Predicted Value of Mean of Response")) GUIDE: text.title(label ("Scatter Plot of Predicted Value of Mean of Response by mg/m2")) ELEMENT: point(position (mgm2*MeanPredicted_1 )) END GPL. </pre> |             |
| Resources | Processor Time                                                                                                                                                                                                                                                                                                                                                                                                                                                                                                                                                                                         | 00:00:00.13 |
|           | Elapsed Time                                                                                                                                                                                                                                                                                                                                                                                                                                                                                                                                                                                           | 00:00:00.00 |

Scatter Plot of Predicted Value of Mean of Response by mg/m2

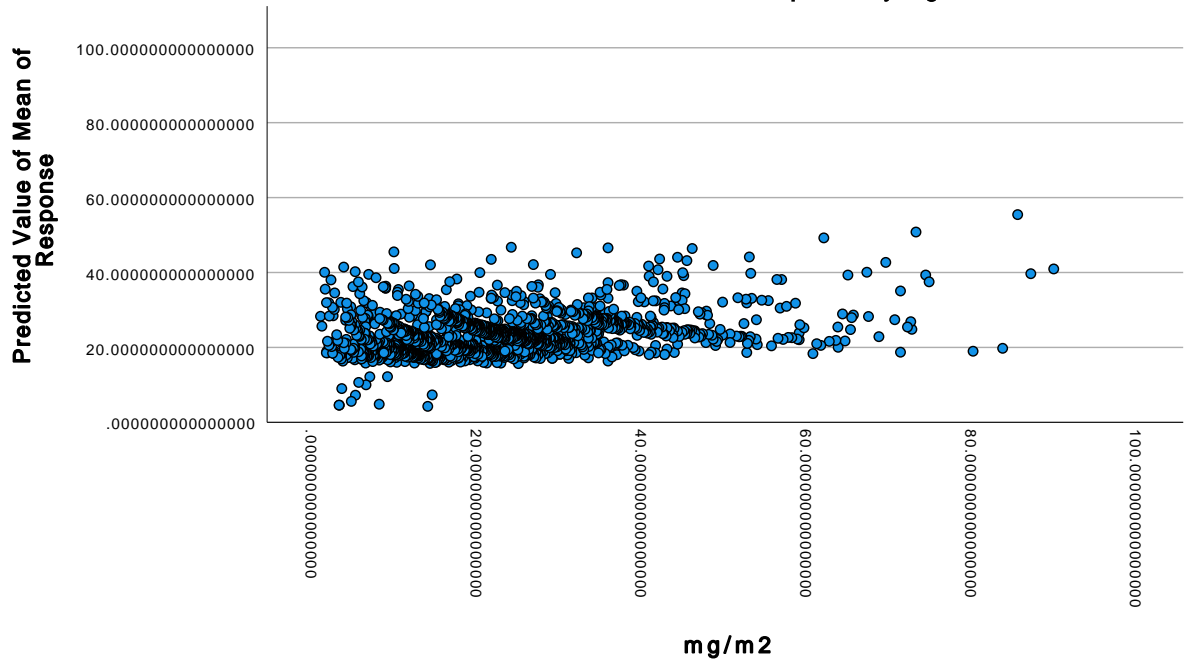

Supplement: pone.0282440.s007.pdf [file pone.0282440.s007.pdf]
