# Supplementary material for: Prednisolone prescribing practices for dogs in Australia
Source: PubMed Central journal article supplement (PMC9974108; doi:10.1371/journal.pone.0282440), 2023-02-28
Supplement: pone.0282440.s005.pdf [file pone.0282440.s005.pdf]

## Generalized Linear Models

### Notes

|                        |                                |                                                                                                                                                                                                                                                                                                                                                                                                                                                          |
|------------------------|--------------------------------|----------------------------------------------------------------------------------------------------------------------------------------------------------------------------------------------------------------------------------------------------------------------------------------------------------------------------------------------------------------------------------------------------------------------------------------------------------|
| Output Created         |                                | 27-JUL-2022 10:38:37                                                                                                                                                                                                                                                                                                                                                                                                                                     |
| Comments               |                                |                                                                                                                                                                                                                                                                                                                                                                                                                                                          |
| Input                  | Data                           | /Users/bonniepurcell/Desktop/SPSS /SPSS Whole data set correct sex.sav                                                                                                                                                                                                                                                                                                                                                                                   |
|                        | Active Dataset                 | DataSet1                                                                                                                                                                                                                                                                                                                                                                                                                                                 |
|                        | Filter                         | <none>                                                                                                                                                                                                                                                                                                                                                                                                                                                   |
|                        | Weight                         | <none>                                                                                                                                                                                                                                                                                                                                                                                                                                                   |
|                        | Split File                     | <none>                                                                                                                                                                                                                                                                                                                                                                                                                                                   |
|                        | N of Rows in Working Data File | 2000                                                                                                                                                                                                                                                                                                                                                                                                                                                     |
| Missing Value Handling | Definition of Missing          | User-defined missing values for factor, subject and within-subject variables are treated as missing.                                                                                                                                                                                                                                                                                                                                                     |
|                        | Cases Used                     | Statistics are based on cases with valid data for all variables in the model.                                                                                                                                                                                                                                                                                                                                                                            |
| Weight Handling        |                                | not applicable                                                                                                                                                                                                                                                                                                                                                                                                                                           |
| Syntax                 |                                | <pre> GENLIN mgkg BY bodysystemrecoded Indicateddose Sex (ORDER=ASCENDING) WITH Weight@ Age_yearscalc /MODEL bodysystemrecoded Indicateddose Sex Weight@ Age_yearscalc INTERCEPT=YES DISTRIBUTION=NORMAL LINK=IDENTITY /CRITERIA SCALE=MLE COVB=MODEL PCONVERGE=1E-006 (ABSOLUTE) SINGULAR=1E-012 ANALYSISTYPE=3(LR) CILEVEL=95 CITYPE=WALD LIKELIHOOD=FULL /MISSING CLASSMISSING=EXCLUDE /PRINT CPS DESCRIPTIVES MODELINFO FIT SUMMARY SOLUTION. </pre> |
| Resources              | Processor Time                 | 00:00:00.62                                                                                                                                                                                                                                                                                                                                                                                                                                              |
|                        | Elapsed Time                   | 00:00:00.00                                                                                                                                                                                                                                                                                                                                                                                                                                              |

### Model Information

|                          |          |
|--------------------------|----------|
| Dependent Variable       | mg/kg    |
| Probability Distribution | Normal   |
| Link Function            | Identity |

### Case Processing Summary

|          | N    | Percent |
|----------|------|---------|
| Included | 1886 | 94.3%   |
| Excluded | 114  | 5.7%    |
| Total    | 2000 | 100.0%  |

### Categorical Variable Information

|        |                   | N              | Percent     |
|--------|-------------------|----------------|-------------|
| Factor | bodysystemrecoded | 2.00           | 24 1.3%     |
|        |                   | 3.00           | 80 4.2%     |
|        |                   | 4.00           | 22 1.2%     |
|        |                   | 5.00           | 61 3.2%     |
|        |                   | 6.00           | 33 1.7%     |
|        |                   | 7.00           | 10 0.5%     |
|        |                   | 8.00           | 7 0.4%      |
|        |                   | 10.00          | 6 0.3%      |
|        |                   | 11.00          | 1643 87.1%  |
|        |                   | Total          | 1886 100.0% |
|        |                   | Indicated dose | 1           |
| 2      | 1796 95.2%        |                |             |
| 3      | 80 4.2%           |                |             |
| Total  | 1886 100.0%       |                |             |
| Sex    | 0                 | 114 6.0%       |             |
|        | 1                 | 736 39.0%      |             |
|        | 2                 | 203 10.8%      |             |
|        | 3                 | 833 44.2%      |             |
|        | Total             | 1886 100.0%    |             |

### Continuous Variable Information

|                    |               | N    | Minimum    | Maximum    | Mean       |
|--------------------|---------------|------|------------|------------|------------|
| Dependent Variable | mg/kg         | 1886 | .032722513 | 5.00000000 | .915651300 |
| Covariate          | Weight®       | 1886 | 1.56       | 90.00      | 19.3139    |
|                    | Age_yearscalc | 1886 | .17        | 18.33      | 6.2843     |

### Continuous Variable Information

|                    |               | Std. Deviation |
|--------------------|---------------|----------------|
| Dependent Variable | mg/kg         | .516284623     |
| Covariate          | Weight®       | 12.57011       |
|                    | Age_yearscalc | 4.12004        |

### Goodness of Fit<sup>a</sup>

|                                      | Value     | df   | Value/df |
|--------------------------------------|-----------|------|----------|
| Deviance                             | 441.413   | 1871 | .236     |
| Scaled Deviance                      | 1886.000  | 1871 |          |
| Pearson Chi-Square                   | 441.413   | 1871 | .236     |
| Scaled Pearson Chi-Square            | 1886.000  | 1871 |          |
| Log Likelihood <sup>b</sup>          | -1306.663 |      |          |
| Akaike's Information Criterion (AIC) | 2645.326  |      |          |
| Finite Sample Corrected AIC (AICC)   | 2645.617  |      |          |
| Bayesian Information Criterion (BIC) | 2734.002  |      |          |
| Consistent AIC (CAIC)                | 2750.002  |      |          |

Dependent Variable: mg/kg

Model: (Intercept), bodysystemrecoded, Indicated dose, Sex, Weight@, Age\_yearscalc<sup>a</sup>

- a. Information criteria are in smaller-is-better form.
- b. The full log likelihood function is displayed and used in computing information criteria.

### Omnibus Test<sup>a</sup>

| Likelihood Ratio Chi-Square | df | Sig. |
|-----------------------------|----|------|
| 244.252                     | 14 | .000 |

Dependent Variable: mg/kg

Model: (Intercept), bodysystemrecoded, Indicated dose, Sex, Weight@, Age\_yearscalc<sup>a</sup>

- a. Compares the fitted model against the intercept-only...

### Tests of Model Effects

| Source            | Type III                    |    |       |
|-------------------|-----------------------------|----|-------|
|                   | Likelihood Ratio Chi-Square | df | Sig.  |
| (Intercept)       | 394.064                     | 1  | .000  |
| bodysystemrecoded | 40.236                      | 7  | <.001 |
| Indicated dose    | 37.182                      | 1  | <.001 |
| Sex               | 9.449                       | 3  | .024  |
| Weight@           | 30.738                      | 1  | <.001 |
| Age_yearscalc     | 8.751                       | 1  | .003  |

Dependent Variable: mg/kg

Model: (Intercept), bodysystemrecoded, Indicated dose, Sex, Weight@, Age\_yearscalc

### Parameter Estimates

| Parameter                 | B                 | Std. Error | 95% Wald Confidence Interval |       | Hypothesis Test |
|---------------------------|-------------------|------------|------------------------------|-------|-----------------|
|                           |                   |            | Lower                        | Upper | Wald Chi-Square |
| (Intercept)               | 1.468             | .0804      | 1.311                        | 1.626 | 333.832         |
| [bodysystemrecoded=2.00]  | .111              | .0996      | -.085                        | .306  | 1.232           |
| [bodysystemrecoded=3.00]  | .093              | .0573      | -.020                        | .205  | 2.612           |
| [bodysystemrecoded=4.00]  | .270              | .1047      | .064                         | .475  | 6.629           |
| [bodysystemrecoded=5.00]  | .293              | .0670      | .161                         | .424  | 19.065          |
| [bodysystemrecoded=6.00]  | .489              | .1116      | .270                         | .707  | 19.183          |
| [bodysystemrecoded=7.00]  | -1.019            | .1708      | -1.354                       | -.684 | 35.597          |
| [bodysystemrecoded=8.00]  | .036              | .1880      | -.333                        | .404  | .036            |
| [bodysystemrecoded=10.00] | .188              | .1981      | -.201                        | .576  | .898            |
| [bodysystemrecoded=11.00] | 0 <sup>a</sup>    | .          | .                            | .     | .               |
| [Indicated dose=1]        | 0 <sup>a</sup>    | .          | .                            | .     | .               |
| [Indicated dose=2]        | -.461             | .0752      | -.608                        | -.313 | 37.551          |
| [Indicated dose=3]        | 0 <sup>a</sup>    | .          | .                            | .     | .               |
| [Sex=0]                   | .145              | .0487      | .050                         | .241  | 8.917           |
| [Sex=1]                   | .011              | .0246      | -.037                        | .059  | .209            |
| [Sex=2]                   | .042              | .0384      | -.034                        | .117  | 1.175           |
| [Sex=3]                   | 0 <sup>a</sup>    | .          | .                            | .     | .               |
| Weight@                   | -.005             | .0009      | -.007                        | -.003 | 30.990          |
| Age_yearscalc             | -.009             | .0029      | -.014                        | -.003 | 8.771           |
| (Scale)                   | .234 <sup>b</sup> | .0076      | .220                         | .249  |                 |

## Parameter Estimates

| Parameter                 | Hypothesis Test |       |
|---------------------------|-----------------|-------|
|                           | df              | Sig.  |
| (Intercept)               | 1               | .000  |
| [bodysystemrecoded=2.00]  | 1               | .267  |
| [bodysystemrecoded=3.00]  | 1               | .106  |
| [bodysystemrecoded=4.00]  | 1               | .010  |
| [bodysystemrecoded=5.00]  | 1               | <.001 |
| [bodysystemrecoded=6.00]  | 1               | <.001 |
| [bodysystemrecoded=7.00]  | 1               | <.001 |
| [bodysystemrecoded=8.00]  | 1               | .849  |
| [bodysystemrecoded=10.00] | 1               | .343  |
| [bodysystemrecoded=11.00] | .               | .     |
| [Indicated dose=1]        | .               | .     |
| [Indicated dose=2]        | 1               | <.001 |
| [Indicated dose=3]        | .               | .     |
| [Sex=0]                   | 1               | .003  |
| [Sex=1]                   | 1               | .647  |
| [Sex=2]                   | 1               | .278  |
| [Sex=3]                   | .               | .     |
| Weight@                   | 1               | <.001 |
| Age_yearscalc             | 1               | .003  |
| (Scale)                   |                 |       |

Dependent Variable: mg/kg

Model: (Intercept), bodysystemrecoded, Indicated dose, Sex, Weight@, Age\_yearscalc

- a. Set to zero because this parameter is redundant.
- b. Maximum likelihood estimate.

## Regression

### Notes

|                        |                                               |                                                                                                                                                                                                                                              |
|------------------------|-----------------------------------------------|----------------------------------------------------------------------------------------------------------------------------------------------------------------------------------------------------------------------------------------------|
| Output Created         |                                               | 27-JUL-2022 11:03:45                                                                                                                                                                                                                         |
| Comments               |                                               |                                                                                                                                                                                                                                              |
| Input                  | Data                                          | /Users/bonniepurcell/Desktop/SPSS /SPSS Whole data set correct sex.sav                                                                                                                                                                       |
|                        | Active Dataset                                | DataSet1                                                                                                                                                                                                                                     |
|                        | Filter                                        | <none>                                                                                                                                                                                                                                       |
|                        | Weight                                        | <none>                                                                                                                                                                                                                                       |
|                        | Split File                                    | <none>                                                                                                                                                                                                                                       |
|                        | N of Rows in Working Data File                | 2000                                                                                                                                                                                                                                         |
| Missing Value Handling | Definition of Missing                         | User-defined missing values are treated as missing.                                                                                                                                                                                          |
|                        | Cases Used                                    | Statistics are based on cases with no missing values for any variable used.                                                                                                                                                                  |
| Syntax                 |                                               | REGRESSION<br>/MISSING LISTWISE<br>/STATISTICS COEFF<br>OUTS CI(95) R ANOVA<br>CHANGE<br>/CRITERIA=PIN(.05)<br>POUT(.10)<br>/NOORIGIN<br>/DEPENDENT mgkg<br>/METHOD=ENTER<br>Weight@ Age_yearscal<br>Sex Indicateddose<br>bodysystemrecoded. |
| Resources              | Processor Time                                | 00:00:00.05                                                                                                                                                                                                                                  |
|                        | Elapsed Time                                  | 00:00:01.00                                                                                                                                                                                                                                  |
|                        | Memory Required                               | 7216 bytes                                                                                                                                                                                                                                   |
|                        | Additional Memory Required for Residual Plots | 0 bytes                                                                                                                                                                                                                                      |

### Variables Entered/Removed<sup>a</sup>

| Model | Variables Entered                                                         | Variables Removed | Method |
|-------|---------------------------------------------------------------------------|-------------------|--------|
| 1     | bodysystemrecoded, Sex, Weight@, Indicateddose, Age_yearscal <sup>b</sup> | .                 | Enter  |

a. Dependent Variable: mg/kg

b. All requested variables entered.

### Model Summary

| Model | R                 | R Square | Adjusted R Square | Std. Error of the Estimate | Change Statistics |          |
|-------|-------------------|----------|-------------------|----------------------------|-------------------|----------|
|       |                   |          |                   |                            | R Square Change   | F Change |
| 1     | .330 <sup>a</sup> | .109     | .107              | .487936741                 | .109              | 46.078   |

### Model Summary

| Model | Change Statistics |      |               |
|-------|-------------------|------|---------------|
|       | df1               | df2  | Sig. F Change |
| 1     | 5                 | 1880 | <.001         |

a. Predictors: (Constant), bodysystemrecoded, Sex, Weight®, Indicated dose, Age\_yearscalc

### ANOVA<sup>a</sup>

| Model |            | Sum of Squares | df   | Mean Square | F      | Sig.               |
|-------|------------|----------------|------|-------------|--------|--------------------|
| 1     | Regression | 54.852         | 5    | 10.970      | 46.078 | <.001 <sup>b</sup> |
|       | Residual   | 447.595        | 1880 | .238        |        |                    |
|       | Total      | 502.446        | 1885 |             |        |                    |

a. Dependent Variable: mg/kg

b. Predictors: (Constant), bodysystemrecoded, Sex, Weight®, Indicated dose, Age\_yearscalc

### Coefficients<sup>a</sup>

| Model |                   | Unstandardized Coefficients |            | Standardized Coefficients | t      | Sig.  |
|-------|-------------------|-----------------------------|------------|---------------------------|--------|-------|
|       |                   | B                           | Std. Error | Beta                      |        |       |
| 1     | (Constant)        | .032                        | .134       |                           | .241   | .809  |
|       | Weight®           | -.005                       | .001       | -.120                     | -5.348 | <.001 |
|       | Age_yearscalc     | -.009                       | .003       | -.074                     | -3.195 | .001  |
|       | Sex               | -.019                       | .011       | -.039                     | -1.776 | .076  |
|       | Indicated dose    | .644                        | .053       | .268                      | 12.107 | <.001 |
|       | bodysystemrecoded | -.023                       | .005       | -.105                     | -4.515 | <.001 |

### Coefficients<sup>a</sup>

| Model |                   | 95.0% Confidence Interval for B |             |
|-------|-------------------|---------------------------------|-------------|
|       |                   | Lower Bound                     | Upper Bound |
| 1     | (Constant)        | -.231                           | .296        |
|       | Weight®           | -.007                           | -.003       |
|       | Age_yearscalc     | -.015                           | -.004       |
|       | Sex               | -.041                           | .002        |
|       | Indicated dose    | .539                            | .748        |
|       | bodysystemrecoded | -.034                           | -.013       |

a. Dependent Variable: mg/kg

## Generalized Linear Models

### Notes

|                        |                                |                                                                                                                                                                                                                                                                                                                                                                                                                                                          |
|------------------------|--------------------------------|----------------------------------------------------------------------------------------------------------------------------------------------------------------------------------------------------------------------------------------------------------------------------------------------------------------------------------------------------------------------------------------------------------------------------------------------------------|
| Output Created         |                                | 27-JUL-2022 11:09:50                                                                                                                                                                                                                                                                                                                                                                                                                                     |
| Comments               |                                |                                                                                                                                                                                                                                                                                                                                                                                                                                                          |
| Input                  | Data                           | /Users/bonniepurcell/Desktop/SPSS /SPSS Whole data set correct sex.sav                                                                                                                                                                                                                                                                                                                                                                                   |
|                        | Active Dataset                 | DataSet1                                                                                                                                                                                                                                                                                                                                                                                                                                                 |
|                        | Filter                         | <none>                                                                                                                                                                                                                                                                                                                                                                                                                                                   |
|                        | Weight                         | <none>                                                                                                                                                                                                                                                                                                                                                                                                                                                   |
|                        | Split File                     | <none>                                                                                                                                                                                                                                                                                                                                                                                                                                                   |
|                        | N of Rows in Working Data File | 2000                                                                                                                                                                                                                                                                                                                                                                                                                                                     |
| Missing Value Handling | Definition of Missing          | User-defined missing values for factor, subject and within-subject variables are treated as missing.                                                                                                                                                                                                                                                                                                                                                     |
|                        | Cases Used                     | Statistics are based on cases with valid data for all variables in the model.                                                                                                                                                                                                                                                                                                                                                                            |
| Weight Handling        |                                | not applicable                                                                                                                                                                                                                                                                                                                                                                                                                                           |
| Syntax                 |                                | <pre> GENLIN mgm2 BY bodysystemrecoded Indicateddose Sex (ORDER=ASCENDING) WITH Weight@ Age_yearscalc /MODEL bodysystemrecoded Indicateddose Sex Weight@ Age_yearscalc INTERCEPT=YES DISTRIBUTION=NORMAL LINK=IDENTITY /CRITERIA SCALE=MLE COVB=MODEL PCONVERGE=1E-006 (ABSOLUTE) SINGULAR=1E-012 ANALYSISTYPE=3(LR) CILEVEL=95 CITYPE=WALD LIKELIHOOD=FULL /MISSING CLASSMISSING=EXCLUDE /PRINT CPS DESCRIPTIVES MODELINFO FIT SUMMARY SOLUTION. </pre> |
| Resources              | Processor Time                 | 00:00:00.63                                                                                                                                                                                                                                                                                                                                                                                                                                              |
|                        | Elapsed Time                   | 00:00:01.00                                                                                                                                                                                                                                                                                                                                                                                                                                              |



### Model Information

|                          |          |
|--------------------------|----------|
| Dependent Variable       | mg/m2    |
| Probability Distribution | Normal   |
| Link Function            | Identity |

### Case Processing Summary

|          | N    | Percent |
|----------|------|---------|
| Included | 1886 | 94.3%   |
| Excluded | 114  | 5.7%    |
| Total    | 2000 | 100.0%  |

### Generalized Linear Models

#### Notes

|                        |                                |                                                                                                      |
|------------------------|--------------------------------|------------------------------------------------------------------------------------------------------|
| Output Created         | 27-JUL-2022 11:56:51           |                                                                                                      |
| Comments               |                                |                                                                                                      |
| Input                  | Data                           | /Users/bonniepurcell/Desktop/SPSS /SPSS Whole data set correct sex.sav                               |
|                        | Active Dataset                 | DataSet1                                                                                             |
|                        | Filter                         | <none>                                                                                               |
|                        | Weight                         | <none>                                                                                               |
|                        | Split File                     | <none>                                                                                               |
|                        | N of Rows in Working Data File | 2000                                                                                                 |
| Missing Value Handling | Definition of Missing          | User-defined missing values for factor, subject and within-subject variables are treated as missing. |
|                        | Cases Used                     | Statistics are based on cases with valid data for all variables in the model.                        |
| Weight Handling        | not applicable                 |                                                                                                      |

## Notes

|           |                                                                                                                                                                                                                                                                                                                                                                                                                                                    |             |
|-----------|----------------------------------------------------------------------------------------------------------------------------------------------------------------------------------------------------------------------------------------------------------------------------------------------------------------------------------------------------------------------------------------------------------------------------------------------------|-------------|
| Syntax    | <pre> GENLIN mgm2 BY bodysystemrecoded Indicateddose (ORDER=ASCENDING) WITH Weight@ Age_yearscalc /MODEL bodysystemrecoded Indicateddose Weight@ Age_yearscalc INTERCEPT=YES DISTRIBUTION=NORMAL LINK=IDENTITY /CRITERIA SCALE=MLE COVB=MODEL PCONVERGE=1E-006 (ABSOLUTE) SINGULAR=1E-012 ANALYSISTYPE=3(LR)   CILEVEL=95 CITYPE=WALD LIKELIHOOD=FULL /MISSING CLASSMISSING=EXCLUDE /PRINT CPS DESCRIPTIVES MODELINFO FIT SUMMARY SOLUTION. </pre> |             |
| Resources | Processor Time                                                                                                                                                                                                                                                                                                                                                                                                                                     | 00:00:00.42 |
|           | Elapsed Time                                                                                                                                                                                                                                                                                                                                                                                                                                       | 00:00:00.00 |

### Model Information

|                          |          |
|--------------------------|----------|
| Dependent Variable       | mg/m2    |
| Probability Distribution | Normal   |
| Link Function            | Identity |

### Case Processing Summary

|              | N           | Percent       |
|--------------|-------------|---------------|
| Included     | 1886        | 94.3%         |
| Excluded     | 114         | 5.7%          |
| <b>Total</b> | <b>2000</b> | <b>100.0%</b> |

### Categorical Variable Information

|        |                   | N     | Percent        |        |
|--------|-------------------|-------|----------------|--------|
| Factor | bodysystemrecoded | 2.00  | 24             | 1.3%   |
|        |                   | 3.00  | 80             | 4.2%   |
|        |                   | 4.00  | 22             | 1.2%   |
|        |                   | 5.00  | 61             | 3.2%   |
|        |                   | 6.00  | 33             | 1.7%   |
|        |                   | 7.00  | 10             | 0.5%   |
|        |                   | 8.00  | 7              | 0.4%   |
|        |                   | 10.00 | 6              | 0.3%   |
|        |                   | 11.00 | 1643           | 87.1%  |
|        |                   | Total | 1886           | 100.0% |
|        |                   |       | Indicated dose | 1      |
| 2      | 1796              |       |                | 95.2%  |
| 3      | 80                |       |                | 4.2%   |
| Total  | 1886              |       |                | 100.0% |

### Continuous Variable Information

|                    |              | N    | Minimum    | Maximum    | Mean       |
|--------------------|--------------|------|------------|------------|------------|
| Dependent Variable | mg/m2        | 1886 | 1.09113813 | 106.655183 | 22.7675797 |
| Covariate          | Weight®      | 1886 | 1.56       | 90.00      | 19.3139    |
|                    | Age_yearsalc | 1886 | .17        | 18.33      | 6.2843     |

### Continuous Variable Information

|                    |              | Std. Deviation |
|--------------------|--------------|----------------|
| Dependent Variable | mg/m2        | 13.0648639     |
| Covariate          | Weight®      | 12.57011       |
|                    | Age_yearsalc | 4.12004        |

### Goodness of Fit<sup>a</sup>

|                                      | Value      | df   | Value/df |
|--------------------------------------|------------|------|----------|
| Deviance                             | 270631.591 | 1874 | 144.414  |
| Scaled Deviance                      | 1886.000   | 1874 |          |
| Pearson Chi-Square                   | 270631.591 | 1874 | 144.414  |
| Scaled Pearson Chi-Square            | 1886.000   | 1874 |          |
| Log Likelihood <sup>b</sup>          | -7359.339  |      |          |
| Akaike's Information Criterion (AIC) | 14744.678  |      |          |
| Finite Sample Corrected AIC (AICC)   | 14744.873  |      |          |
| Bayesian Information Criterion (BIC) | 14816.727  |      |          |
| Consistent AIC (CAIC)                | 14829.727  |      |          |

Dependent Variable: mg/m2

Model: (Intercept), bodysystemrecoded, Indicated dose, Weight®, Age\_yearscalc<sup>a</sup>

- Information criteria are in smaller-is-better form.
- The full log likelihood function is displayed and used in computing information criteria.

### Omnibus Test<sup>a</sup>

| Likelihood Ratio Chi-Square | df | Sig. |
|-----------------------------|----|------|
| 326.320                     | 11 | .000 |

Dependent Variable: mg/m2

Model: (Intercept), bodysystemrecoded, Indicated dose, Weight®, Age\_yearscalc<sup>a</sup>

- Compares the fitted model against the intercept-only...

### Tests of Model Effects

| Source            | Likelihood Ratio Chi-Square | Type III |       |
|-------------------|-----------------------------|----------|-------|
|                   |                             | df       | Sig.  |
| (Intercept)       | 393.523                     | 1        | .000  |
| bodysystemrecoded | 24.993                      | 7        | <.001 |
| Indicated dose    | 37.137                      | 1        | <.001 |
| Weight®           | 138.359                     | 1        | .000  |
| Age_yearscalc     | 11.390                      | 1        | <.001 |

Dependent Variable: mg/m2

Model: (Intercept), bodysystemrecoded, Indicated dose, Weight®, Age\_yearscalc

### Parameter Estimates

| Parameter                 | B                    | Std. Error | 95% Wald Confidence Interval |         | Hypothesis Test |
|---------------------------|----------------------|------------|------------------------------|---------|-----------------|
|                           |                      |            | Lower                        | Upper   | Wald Chi-Square |
| (Intercept)               | 29.489               | 1.9592     | 25.649                       | 33.329  | 226.556         |
| [bodysystemrecoded=2.00]  | 2.466                | 2.4648     | -2.365                       | 7.297   | 1.001           |
| [bodysystemrecoded=3.00]  | 1.657                | 1.4181     | -1.122                       | 4.437   | 1.366           |
| [bodysystemrecoded=4.00]  | 4.776                | 2.5896     | -.299                        | 9.852   | 3.402           |
| [bodysystemrecoded=5.00]  | 4.556                | 1.6540     | 1.315                        | 7.798   | 7.589           |
| [bodysystemrecoded=6.00]  | 11.231               | 2.7617     | 5.818                        | 16.644  | 16.538          |
| [bodysystemrecoded=7.00]  | -24.155              | 4.2257     | -32.438                      | -15.873 | 32.676          |
| [bodysystemrecoded=8.00]  | 4.453                | 4.6550     | -4.671                       | 13.576  | .915            |
| [bodysystemrecoded=10.00] | 3.178                | 4.9032     | -6.432                       | 12.788  | .420            |
| [bodysystemrecoded=11.00] | 0 <sup>a</sup>       | .          | .                            | .       | .               |
| [Indicated dose=1]        | 0 <sup>a</sup>       | .          | .                            | .       | .               |
| [Indicated dose=2]        | -11.390              | 1.8598     | -15.035                      | -7.744  | 37.505          |
| [Indicated dose=3]        | 0 <sup>a</sup>       | .          | .                            | .       | .               |
| Weight@                   | .271                 | .0226      | .227                         | .316    | 143.561         |
| Age_yearscalc             | -.241                | .0712      | -.380                        | -.101   | 11.424          |
| (Scale)                   | 143.495 <sup>b</sup> | 4.6728     | 134.623                      | 152.952 |                 |

## Parameter Estimates

### Hypothesis Test

| Parameter                 | df | Sig.  |
|---------------------------|----|-------|
| (Intercept)               | 1  | .000  |
| [bodysystemrecoded=2.00]  | 1  | .317  |
| [bodysystemrecoded=3.00]  | 1  | .243  |
| [bodysystemrecoded=4.00]  | 1  | .065  |
| [bodysystemrecoded=5.00]  | 1  | .006  |
| [bodysystemrecoded=6.00]  | 1  | <.001 |
| [bodysystemrecoded=7.00]  | 1  | <.001 |
| [bodysystemrecoded=8.00]  | 1  | .339  |
| [bodysystemrecoded=10.00] | 1  | .517  |
| [bodysystemrecoded=11.00] | .  | .     |
| [Indicated dose=1]        | .  | .     |
| [Indicated dose=2]        | 1  | <.001 |
| [Indicated dose=3]        | .  | .     |
| Weight®                   | 1  | .000  |
| Age_yearscalc             | 1  | <.001 |
| (Scale)                   |    |       |

Dependent Variable: mg/m2

Model: (Intercept), bodysystemrecoded, Indicated dose, Weight®, Age\_yearscalc

- a. Set to zero because this parameter is redundant.
- b. Maximum likelihood estimate.
