# Supplementary material for: Prednisolone prescribing practices for dogs in Australia
Source: PubMed Central journal article supplement (PMC9974108; doi:10.1371/journal.pone.0282440), 2023-02-28
Supplement: pone.0282440.s006.pdf [file pone.0282440.s006.pdf]

## Generalized Linear Models

### Notes

|                        |                                |                                                                                                                                                                                                                                                                                                                                                                                                                                                      |
|------------------------|--------------------------------|------------------------------------------------------------------------------------------------------------------------------------------------------------------------------------------------------------------------------------------------------------------------------------------------------------------------------------------------------------------------------------------------------------------------------------------------------|
| Output Created         |                                | 13-JUL-2022 17:13:08                                                                                                                                                                                                                                                                                                                                                                                                                                 |
| Comments               |                                |                                                                                                                                                                                                                                                                                                                                                                                                                                                      |
| Input                  | Data                           | /Users/bonniepurcell/Desktop/SPSS /SPSS Whole data set correct sex.sav                                                                                                                                                                                                                                                                                                                                                                               |
|                        | Active Dataset                 | DataSet1                                                                                                                                                                                                                                                                                                                                                                                                                                             |
|                        | Filter                         | <none>                                                                                                                                                                                                                                                                                                                                                                                                                                               |
|                        | Weight                         | <none>                                                                                                                                                                                                                                                                                                                                                                                                                                               |
|                        | Split File                     | <none>                                                                                                                                                                                                                                                                                                                                                                                                                                               |
|                        | N of Rows in Working Data File | 2000                                                                                                                                                                                                                                                                                                                                                                                                                                                 |
| Missing Value Handling | Definition of Missing          | User-defined missing values for factor, subject and within-subject variables are treated as missing.                                                                                                                                                                                                                                                                                                                                                 |
|                        | Cases Used                     | Statistics are based on cases with valid data for all variables in the model.                                                                                                                                                                                                                                                                                                                                                                        |
| Weight Handling        |                                | not applicable                                                                                                                                                                                                                                                                                                                                                                                                                                       |
| Syntax                 |                                | <pre> GENLIN mgkg BY bodysystemrecoded Indicateddose Sex (ORDER=ASCENDING) WITH Agemonths Weight@   /MODEL bodysystemrecoded Indicateddose Sex Agemonths Weight@ INTERCEPT=YES DISTRIBUTION=NORMAL LINK=IDENTITY /CRITERIA SCALE=MLE COVB=MODEL PCONVERGE=1E-006 (ABSOLUTE) SINGULAR=1E-012 ANALYSISTYPE=3(LR)   CILEVEL=95 CITYPE=WALD LIKELIHOOD=FULL /MISSING CLASSMISSING=EXCLUDE /PRINT CPS DESCRIPTIVES MODELINFO FIT SUMMARY SOLUTION. </pre> |
| Resources              | Processor Time                 | 00:00:00.65                                                                                                                                                                                                                                                                                                                                                                                                                                          |
|                        | Elapsed Time                   | 00:00:01.00                                                                                                                                                                                                                                                                                                                                                                                                                                          |

[DataSet1] /Users/bonniepurcell/Desktop/SPSS /SPSS Whole data set correct sex.sav

### Model Information

|                          |          |
|--------------------------|----------|
| Dependent Variable       | mg/kg    |
| Probability Distribution | Normal   |
| Link Function            | Identity |

### Case Processing Summary

|          | N    | Percent |
|----------|------|---------|
| Included | 1886 | 94.3%   |
| Excluded | 114  | 5.7%    |
| Total    | 2000 | 100.0%  |

### Categorical Variable Information

|        |                   | N              | Percent     |
|--------|-------------------|----------------|-------------|
| Factor | bodysystemrecoded | 2.00           | 24 1.3%     |
|        |                   | 3.00           | 80 4.2%     |
|        |                   | 4.00           | 22 1.2%     |
|        |                   | 5.00           | 61 3.2%     |
|        |                   | 6.00           | 33 1.7%     |
|        |                   | 7.00           | 10 0.5%     |
|        |                   | 8.00           | 7 0.4%      |
|        |                   | 10.00          | 6 0.3%      |
|        |                   | 11.00          | 1643 87.1%  |
|        |                   | Total          | 1886 100.0% |
|        |                   | Indicated dose | 1           |
| 2      | 1796 95.2%        |                |             |
| 3      | 80 4.2%           |                |             |
| Total  | 1886 100.0%       |                |             |
| Sex    | 0                 | 114 6.0%       |             |
|        | 1                 | 736 39.0%      |             |
|        | 2                 | 203 10.8%      |             |
|        | 3                 | 833 44.2%      |             |
|        | Total             | 1886 100.0%    |             |

### Continuous Variable Information

|                    |              | N    | Minimum    | Maximum    | Mean       |
|--------------------|--------------|------|------------|------------|------------|
| Dependent Variable | mg/kg        | 1886 | .032722513 | 5.00000000 | .915651300 |
| Covariate          | Age (months) | 1886 | 2          | 220        | 75.41      |
|                    | Weight®      | 1886 | 1.56       | 90.00      | 19.3139    |

### Continuous Variable Information

|                    |              | Std. Deviation |
|--------------------|--------------|----------------|
| Dependent Variable | mg/kg        | .516284623     |
| Covariate          | Age (months) | 49.441         |
|                    | Weight®      | 12.57011       |

### Goodness of Fit<sup>a</sup>

|                                      | Value     | df   | Value/df |
|--------------------------------------|-----------|------|----------|
| Deviance                             | 441.413   | 1871 | .236     |
| Scaled Deviance                      | 1886.000  | 1871 |          |
| Pearson Chi-Square                   | 441.413   | 1871 | .236     |
| Scaled Pearson Chi-Square            | 1886.000  | 1871 |          |
| Log Likelihood <sup>b</sup>          | -1306.663 |      |          |
| Akaike's Information Criterion (AIC) | 2645.326  |      |          |
| Finite Sample Corrected AIC (AICC)   | 2645.617  |      |          |
| Bayesian Information Criterion (BIC) | 2734.002  |      |          |
| Consistent AIC (CAIC)                | 2750.002  |      |          |

Dependent Variable: mg/kg

Model: (Intercept), bodysystemrecoded, Indicated dose, Sex, Age (months), Weight<sup>®</sup>

- a. Information criteria are in smaller-is-better form.
- b. The full log likelihood function is displayed and used in computing information criteria.

### Omnibus Test<sup>a</sup>

| Likelihood Ratio Chi-Square | df | Sig. |
|-----------------------------|----|------|
| 244.252                     | 14 | .000 |

Dependent Variable: mg/kg

Model: (Intercept), bodysystemrecoded, Indicated dose, Sex, Age (months), Weight<sup>®</sup>

- a. Compares the fitted model against the intercept-only...

### Tests of Model Effects

| Source              | Type III                    |    |       |
|---------------------|-----------------------------|----|-------|
|                     | Likelihood Ratio Chi-Square | df | Sig.  |
| (Intercept)         | 394.064                     | 1  | .000  |
| bodysystemrecoded   | 40.236                      | 7  | <.001 |
| Indicated dose      | 37.182                      | 1  | <.001 |
| Sex                 | 9.449                       | 3  | .024  |
| Age (months)        | 8.751                       | 1  | .003  |
| Weight <sup>®</sup> | 30.738                      | 1  | <.001 |

Dependent Variable: mg/kg

Model: (Intercept), bodysystemrecoded, Indicated dose, Sex, Age (months), Weight<sup>®</sup>

### Parameter Estimates

| Parameter                 | B                 | Std. Error | 95% Wald Confidence Interval |       | Hypothesis Test |
|---------------------------|-------------------|------------|------------------------------|-------|-----------------|
|                           |                   |            | Lower                        | Upper | Wald Chi-Square |
| (Intercept)               | 1.468             | .0804      | 1.311                        | 1.626 | 333.832         |
| [bodysystemrecoded=2.00]  | .111              | .0996      | -.085                        | .306  | 1.232           |
| [bodysystemrecoded=3.00]  | .093              | .0573      | -.020                        | .205  | 2.612           |
| [bodysystemrecoded=4.00]  | .270              | .1047      | .064                         | .475  | 6.629           |
| [bodysystemrecoded=5.00]  | .293              | .0670      | .161                         | .424  | 19.065          |
| [bodysystemrecoded=6.00]  | .489              | .1116      | .270                         | .707  | 19.183          |
| [bodysystemrecoded=7.00]  | -1.019            | .1708      | -1.354                       | -.684 | 35.597          |
| [bodysystemrecoded=8.00]  | .036              | .1880      | -.333                        | .404  | .036            |
| [bodysystemrecoded=10.00] | .188              | .1981      | -.201                        | .576  | .898            |
| [bodysystemrecoded=11.00] | 0 <sup>a</sup>    | .          | .                            | .     | .               |
| [Indicated dose=1]        | 0 <sup>a</sup>    | .          | .                            | .     | .               |
| [Indicated dose=2]        | -.461             | .0752      | -.608                        | -.313 | 37.551          |
| [Indicated dose=3]        | 0 <sup>a</sup>    | .          | .                            | .     | .               |
| [Sex=0]                   | .145              | .0487      | .050                         | .241  | 8.917           |
| [Sex=1]                   | .011              | .0246      | -.037                        | .059  | .209            |
| [Sex=2]                   | .042              | .0384      | -.034                        | .117  | 1.175           |
| [Sex=3]                   | 0 <sup>a</sup>    | .          | .                            | .     | .               |
| Age (months)              | -.001             | .0002      | -.001                        | .000  | 8.771           |
| Weight@                   | -.005             | .0009      | -.007                        | -.003 | 30.990          |
| (Scale)                   | .234 <sup>b</sup> | .0076      | .220                         | .249  |                 |

## Parameter Estimates

| Parameter                 | Hypothesis Test |       |
|---------------------------|-----------------|-------|
|                           | df              | Sig.  |
| (Intercept)               | 1               | .000  |
| [bodysystemrecoded=2.00]  | 1               | .267  |
| [bodysystemrecoded=3.00]  | 1               | .106  |
| [bodysystemrecoded=4.00]  | 1               | .010  |
| [bodysystemrecoded=5.00]  | 1               | <.001 |
| [bodysystemrecoded=6.00]  | 1               | <.001 |
| [bodysystemrecoded=7.00]  | 1               | <.001 |
| [bodysystemrecoded=8.00]  | 1               | .849  |
| [bodysystemrecoded=10.00] | 1               | .343  |
| [bodysystemrecoded=11.00] | .               | .     |
| [Indicated dose=1]        | .               | .     |
| [Indicated dose=2]        | 1               | <.001 |
| [Indicated dose=3]        | .               | .     |
| [Sex=0]                   | 1               | .003  |
| [Sex=1]                   | 1               | .647  |
| [Sex=2]                   | 1               | .278  |
| [Sex=3]                   | .               | .     |
| Age (months)              | 1               | .003  |
| Weight@<br>(Scale)        | 1               | <.001 |

Dependent Variable: mg/kg

Model: (Intercept), bodysystemrecoded, Indicated dose, Sex, Age (months), Weight@

- a. Set to zero because this parameter is redundant.
- b. Maximum likelihood estimate.

## Generalized Linear Models

## Notes

|                               |                                             |                                                                                                                                                                                                                                                                                                                                                                                                                                                                                                  |
|-------------------------------|---------------------------------------------|--------------------------------------------------------------------------------------------------------------------------------------------------------------------------------------------------------------------------------------------------------------------------------------------------------------------------------------------------------------------------------------------------------------------------------------------------------------------------------------------------|
| Output Created                |                                             | 13-JUL-2022 17:18:54                                                                                                                                                                                                                                                                                                                                                                                                                                                                             |
| Comments                      |                                             |                                                                                                                                                                                                                                                                                                                                                                                                                                                                                                  |
| Input                         | Data                                        | /Users/bonniepurcell/Desktop/SPSS /SPSS Whole data set correct sex.sav                                                                                                                                                                                                                                                                                                                                                                                                                           |
|                               | Active Dataset                              | DataSet1                                                                                                                                                                                                                                                                                                                                                                                                                                                                                         |
|                               | Filter                                      | <none>                                                                                                                                                                                                                                                                                                                                                                                                                                                                                           |
|                               | Weight                                      | <none>                                                                                                                                                                                                                                                                                                                                                                                                                                                                                           |
|                               | Split File                                  | <none>                                                                                                                                                                                                                                                                                                                                                                                                                                                                                           |
|                               | N of Rows in Working Data File              | 2000                                                                                                                                                                                                                                                                                                                                                                                                                                                                                             |
| Missing Value Handling        | Definition of Missing                       | User-defined missing values for factor, subject and within-subject variables are treated as missing.                                                                                                                                                                                                                                                                                                                                                                                             |
|                               | Cases Used                                  | Statistics are based on cases with valid data for all variables in the model.                                                                                                                                                                                                                                                                                                                                                                                                                    |
| Weight Handling               |                                             | not applicable                                                                                                                                                                                                                                                                                                                                                                                                                                                                                   |
| Syntax                        |                                             | <pre> GENLIN mgkg BY bodysystemrecoded Indicateddose Sex (ORDER=ASCENDING) WITH Agemoths Weight@ /MODEL bodysystemrecoded Indicateddose Sex Agemoths Weight@ INTERCEPT=YES DISTRIBUTION=NORMAL LINK=IDENTITY /CRITERIA SCALE=MLE COVB=MODEL PCONVERGE=1E-006 (ABSOLUTE) SINGULAR=1E-012 ANALYSISTYPE=3(LR) CILEVEL=95 CITYPE=WALD LIKELIHOOD=FULL /MISSING CLASSMISSING=EXCLUDE /PRINT CPS DESCRIPTIVES MODELINFO FIT SUMMARY SOLUTION /SAVE MEANPRED RESID PEARSONRESID STDPEARSONRESID. </pre> |
| Resources                     | Processor Time                              | 00:00:00.71                                                                                                                                                                                                                                                                                                                                                                                                                                                                                      |
|                               | Elapsed Time                                | 00:00:00.00                                                                                                                                                                                                                                                                                                                                                                                                                                                                                      |
| Variables Created or Modified | Predicted Value of the Mean of the Response | MeanPredicted                                                                                                                                                                                                                                                                                                                                                                                                                                                                                    |
|                               | Raw Residual                                | Residual                                                                                                                                                                                                                                                                                                                                                                                                                                                                                         |

### Notes

|  |                               |                    |
|--|-------------------------------|--------------------|
|  | Pearson Residual              | PearsonResidual    |
|  | Standardized Pearson Residual | StdPearsonResidual |

### Model Information

|                          |          |
|--------------------------|----------|
| Dependent Variable       | mg/kg    |
| Probability Distribution | Normal   |
| Link Function            | Identity |

### Case Processing Summary

|          | N    | Percent |
|----------|------|---------|
| Included | 1886 | 94.3%   |
| Excluded | 114  | 5.7%    |
| Total    | 2000 | 100.0%  |

### Categorical Variable Information

|        |                   | N     | Percent        |
|--------|-------------------|-------|----------------|
| Factor | bodysystemrecoded | 2.00  | 24 1.3%        |
|        |                   | 3.00  | 80 4.2%        |
|        |                   | 4.00  | 22 1.2%        |
|        |                   | 5.00  | 61 3.2%        |
|        |                   | 6.00  | 33 1.7%        |
|        |                   | 7.00  | 10 0.5%        |
|        |                   | 8.00  | 7 0.4%         |
|        |                   | 10.00 | 6 0.3%         |
|        |                   | 11.00 | 1643 87.1%     |
|        |                   | Total | 1886 100.0%    |
|        |                   |       | Indicated dose |
| 2      | 1796 95.2%        |       |                |
| 3      | 80 4.2%           |       |                |
| Total  | 1886 100.0%       |       |                |
|        | Sex               | 0     | 114 6.0%       |
|        |                   | 1     | 736 39.0%      |
|        |                   | 2     | 203 10.8%      |
|        |                   | 3     | 833 44.2%      |
|        |                   | Total | 1886 100.0%    |

### Continuous Variable Information

|                    |              | N    | Minimum    | Maximum    | Mean       |
|--------------------|--------------|------|------------|------------|------------|
| Dependent Variable | mg/kg        | 1886 | .032722513 | 5.00000000 | .915651300 |
| Covariate          | Age (months) | 1886 | 2          | 220        | 75.41      |
|                    | Weight®      | 1886 | 1.56       | 90.00      | 19.3139    |

### Continuous Variable Information

|                    |              | Std. Deviation |
|--------------------|--------------|----------------|
| Dependent Variable | mg/kg        | .516284623     |
| Covariate          | Age (months) | 49.441         |
|                    | Weight®      | 12.57011       |

### Goodness of Fit<sup>a</sup>

|                                      | Value     | df   | Value/df |
|--------------------------------------|-----------|------|----------|
| Deviance                             | 441.413   | 1871 | .236     |
| Scaled Deviance                      | 1886.000  | 1871 |          |
| Pearson Chi-Square                   | 441.413   | 1871 | .236     |
| Scaled Pearson Chi-Square            | 1886.000  | 1871 |          |
| Log Likelihood <sup>b</sup>          | -1306.663 |      |          |
| Akaike's Information Criterion (AIC) | 2645.326  |      |          |
| Finite Sample Corrected AIC (AICC)   | 2645.617  |      |          |
| Bayesian Information Criterion (BIC) | 2734.002  |      |          |
| Consistent AIC (CAIC)                | 2750.002  |      |          |

Dependent Variable: mg/kg

Model: (Intercept), bodysystemrecoded, Indicated dose, Sex, Age (months), Weight®

- Information criteria are in smaller-is-better form.
- The full log likelihood function is displayed and used in computing information criteria.

### Omnibus Test<sup>a</sup>

| Likelihood Ratio Chi-Square | df | Sig. |
|-----------------------------|----|------|
| 244.252                     | 14 | .000 |

Dependent Variable: mg/kg

Model: (Intercept), bodysystemrecoded, Indicated dose, Sex, Age (months), Weight®

- Compares the fitted model against the intercept-only...



### Tests of Model Effects

| Source            | Likelihood<br>Ratio Chi-<br>Square | Type III |       |
|-------------------|------------------------------------|----------|-------|
|                   |                                    | df       | Sig.  |
| (Intercept)       | 394.064                            | 1        | .000  |
| bodysystemrecoded | 40.236                             | 7        | <.001 |
| Indicated dose    | 37.182                             | 1        | <.001 |
| Sex               | 9.449                              | 3        | .024  |
| Age (months)      | 8.751                              | 1        | .003  |
| Weight®           | 30.738                             | 1        | <.001 |

Dependent Variable: mg/kg

Model: (Intercept), bodysystemrecoded, Indicated dose, Sex, Age (months), Weight®

### Parameter Estimates

| Parameter                 | B                 | Std. Error | 95% Wald Confidence Interval |       | Hypothesis Test<br>Wald Chi-<br>Square |
|---------------------------|-------------------|------------|------------------------------|-------|----------------------------------------|
|                           |                   |            | Lower                        | Upper |                                        |
| (Intercept)               | 1.468             | .0804      | 1.311                        | 1.626 | 333.832                                |
| [bodysystemrecoded=2.00]  | .111              | .0996      | -.085                        | .306  | 1.232                                  |
| [bodysystemrecoded=3.00]  | .093              | .0573      | -.020                        | .205  | 2.612                                  |
| [bodysystemrecoded=4.00]  | .270              | .1047      | .064                         | .475  | 6.629                                  |
| [bodysystemrecoded=5.00]  | .293              | .0670      | .161                         | .424  | 19.065                                 |
| [bodysystemrecoded=6.00]  | .489              | .1116      | .270                         | .707  | 19.183                                 |
| [bodysystemrecoded=7.00]  | -1.019            | .1708      | -1.354                       | -.684 | 35.597                                 |
| [bodysystemrecoded=8.00]  | .036              | .1880      | -.333                        | .404  | .036                                   |
| [bodysystemrecoded=10.00] | .188              | .1981      | -.201                        | .576  | .898                                   |
| [bodysystemrecoded=11.00] | 0 <sup>a</sup>    | .          | .                            | .     | .                                      |
| [Indicated dose=1]        | 0 <sup>a</sup>    | .          | .                            | .     | .                                      |
| [Indicated dose=2]        | -.461             | .0752      | -.608                        | -.313 | 37.551                                 |
| [Indicated dose=3]        | 0 <sup>a</sup>    | .          | .                            | .     | .                                      |
| [Sex=0]                   | .145              | .0487      | .050                         | .241  | 8.917                                  |
| [Sex=1]                   | .011              | .0246      | -.037                        | .059  | .209                                   |
| [Sex=2]                   | .042              | .0384      | -.034                        | .117  | 1.175                                  |
| [Sex=3]                   | 0 <sup>a</sup>    | .          | .                            | .     | .                                      |
| Age (months)              | -.001             | .0002      | -.001                        | .000  | 8.771                                  |
| Weight®                   | -.005             | .0009      | -.007                        | -.003 | 30.990                                 |
| (Scale)                   | .234 <sup>b</sup> | .0076      | .220                         | .249  |                                        |

## Parameter Estimates

| Parameter                 | Hypothesis Test |       |
|---------------------------|-----------------|-------|
|                           | df              | Sig.  |
| (Intercept)               | 1               | .000  |
| [bodysystemrecoded=2.00]  | 1               | .267  |
| [bodysystemrecoded=3.00]  | 1               | .106  |
| [bodysystemrecoded=4.00]  | 1               | .010  |
| [bodysystemrecoded=5.00]  | 1               | <.001 |
| [bodysystemrecoded=6.00]  | 1               | <.001 |
| [bodysystemrecoded=7.00]  | 1               | <.001 |
| [bodysystemrecoded=8.00]  | 1               | .849  |
| [bodysystemrecoded=10.00] | 1               | .343  |
| [bodysystemrecoded=11.00] | .               | .     |
| [Indicated dose=1]        | .               | .     |
| [Indicated dose=2]        | 1               | <.001 |
| [Indicated dose=3]        | .               | .     |
| [Sex=0]                   | 1               | .003  |
| [Sex=1]                   | 1               | .647  |
| [Sex=2]                   | 1               | .278  |
| [Sex=3]                   | .               | .     |
| Age (months)              | 1               | .003  |
| Weight@                   | 1               | <.001 |
| (Scale)                   |                 |       |

Dependent Variable: mg/kg

Model: (Intercept), bodysystemrecoded, Indicated dose, Sex, Age (months), Weight@

- a. Set to zero because this parameter is redundant.
- b. Maximum likelihood estimate.

## GGraph

### Notes

|                |                                                                                                                                                                                                                                                                                                                                                                                                                                                                                                                                |                                                                        |
|----------------|--------------------------------------------------------------------------------------------------------------------------------------------------------------------------------------------------------------------------------------------------------------------------------------------------------------------------------------------------------------------------------------------------------------------------------------------------------------------------------------------------------------------------------|------------------------------------------------------------------------|
| Output Created |                                                                                                                                                                                                                                                                                                                                                                                                                                                                                                                                | 13-JUL-2022 17:20:38                                                   |
| Comments       |                                                                                                                                                                                                                                                                                                                                                                                                                                                                                                                                |                                                                        |
| Input          | Data                                                                                                                                                                                                                                                                                                                                                                                                                                                                                                                           | /Users/bonniepurcell/Desktop/SPSS /SPSS Whole data set correct sex.sav |
|                | Active Dataset                                                                                                                                                                                                                                                                                                                                                                                                                                                                                                                 | DataSet1                                                               |
|                | Filter                                                                                                                                                                                                                                                                                                                                                                                                                                                                                                                         | <none>                                                                 |
|                | Weight                                                                                                                                                                                                                                                                                                                                                                                                                                                                                                                         | <none>                                                                 |
|                | Split File                                                                                                                                                                                                                                                                                                                                                                                                                                                                                                                     | <none>                                                                 |
|                | N of Rows in Working Data File                                                                                                                                                                                                                                                                                                                                                                                                                                                                                                 | 2000                                                                   |
| Syntax         | <pre> GGRAPH   /GRAPHDATASET   NAME="graphdataset"   VARIABLES=Residual   MISSING=LISTWISE   REPORTMISSING=NO   /GRAPHSPEC   SOURCE=INLINE. BEGIN GPL   SOURCE: s=userSource (id("graphdataset"))   DATA: Residual=col (source(s), name ("Residual"))   GUIDE: axis(dim(1), label("Raw Residual"))   GUIDE: axis(dim(2), label("Frequency"))   GUIDE: text.title(label ("Simple Histogram of Raw Residual"))   ELEMENT: interval (position(summary.count (bin.rect(Residual))), shape.interior(shape. square)) END GPL. </pre> |                                                                        |
| Resources      | Processor Time                                                                                                                                                                                                                                                                                                                                                                                                                                                                                                                 | 00:00:02.92                                                            |
|                | Elapsed Time                                                                                                                                                                                                                                                                                                                                                                                                                                                                                                                   | 00:00:03.00                                                            |

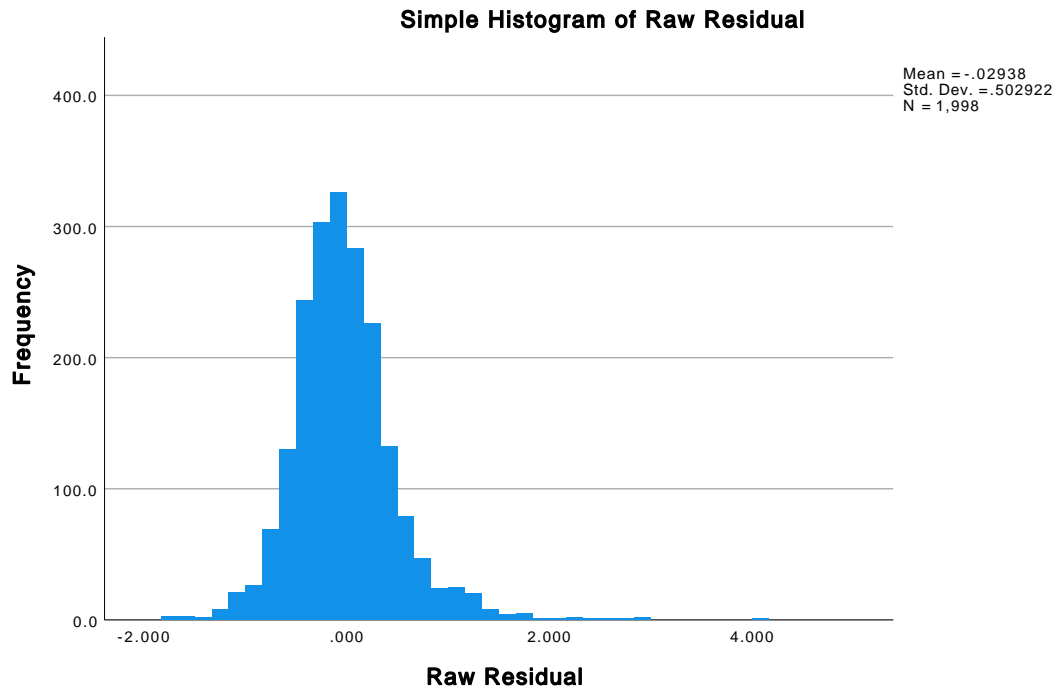

## GGraph

### Notes

|                |                                |                                                                        |
|----------------|--------------------------------|------------------------------------------------------------------------|
| Output Created |                                | 13-JUL-2022 17:22:54                                                   |
| Comments       |                                |                                                                        |
| Input          | Data                           | /Users/bonniepurcell/Desktop/SPSS /SPSS Whole data set correct sex.sav |
|                | Active Dataset                 | DataSet1                                                               |
|                | Filter                         | <none>                                                                 |
|                | Weight                         | <none>                                                                 |
|                | Split File                     | <none>                                                                 |
|                | N of Rows in Working Data File | 2000                                                                   |

## Notes

|           |                                                                                                                                                                                                                                                                                                                                                                                                                                                                                                                                                                                               |             |
|-----------|-----------------------------------------------------------------------------------------------------------------------------------------------------------------------------------------------------------------------------------------------------------------------------------------------------------------------------------------------------------------------------------------------------------------------------------------------------------------------------------------------------------------------------------------------------------------------------------------------|-------------|
| Syntax    | <pre> GGRAPH /GRAPHDATASET NAME="graphdataset" VARIABLES=MeanPredict ed mgkg MISSING=LISTWISE REPORTMISSING=NO /GRAPHSPEC SOURCE=INLINE /FITLINE TOTAL=NO SUBGROUP=NO. BEGIN GPL SOURCE: s=userSource (id("graphdataset")) DATA: MeanPredicted=col (source(s), name ("MeanPredicted")) DATA: mgkg=col (source(s), name("mgkg")) GUIDE: axis(dim(1), label("Predicted Value of Mean of Response")) GUIDE: axis(dim(2), label("mg/kg")) GUIDE: text.title(label ("Scatter Plot of mg/kg by Predicted Value of Mean of Response")) ELEMENT: point(position (MeanPredicted*mgkg)) END GPL. </pre> |             |
| Resources | Processor Time                                                                                                                                                                                                                                                                                                                                                                                                                                                                                                                                                                                | 00:00:00.21 |
|           | Elapsed Time                                                                                                                                                                                                                                                                                                                                                                                                                                                                                                                                                                                  | 00:00:00.00 |

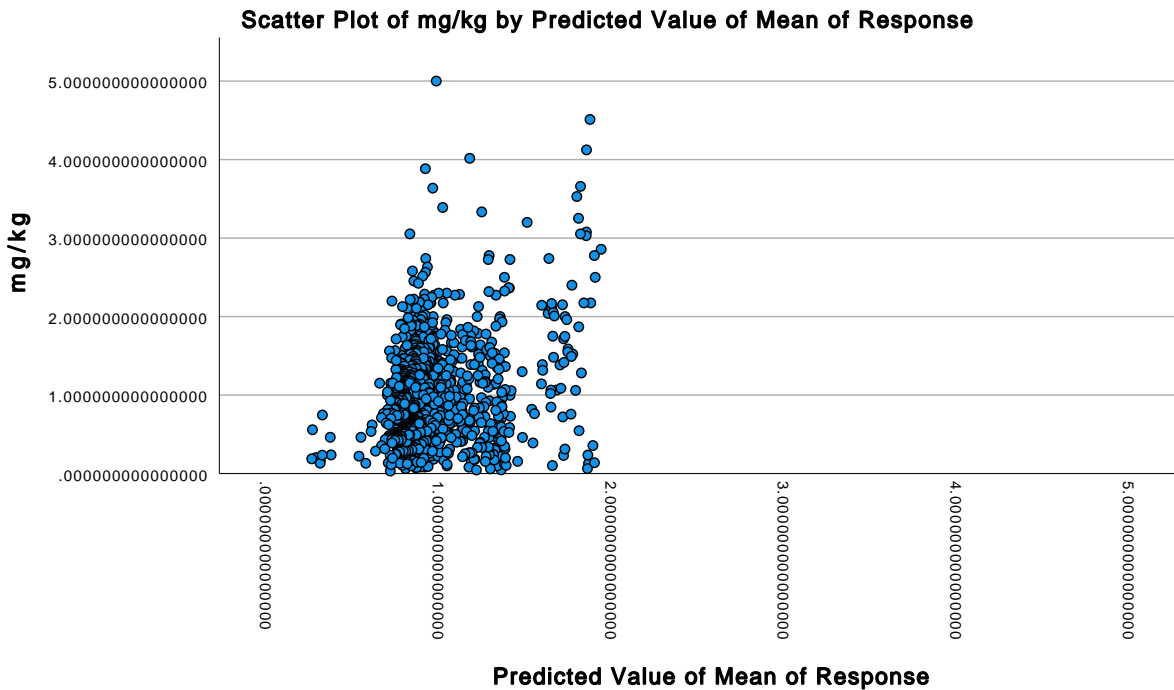

## Generalized Linear Models

### Notes

|                        |                                |                                                                                                                                                                                                                                                                                                                                                                                                                                                                                                                     |
|------------------------|--------------------------------|---------------------------------------------------------------------------------------------------------------------------------------------------------------------------------------------------------------------------------------------------------------------------------------------------------------------------------------------------------------------------------------------------------------------------------------------------------------------------------------------------------------------|
| Output Created         |                                | 13-JUL-2022 17:28:05                                                                                                                                                                                                                                                                                                                                                                                                                                                                                                |
| Comments               |                                |                                                                                                                                                                                                                                                                                                                                                                                                                                                                                                                     |
| Input                  | Data                           | /Users/bonniepurcell/Desktop/SPSS /SPSS Whole data set correct sex.sav                                                                                                                                                                                                                                                                                                                                                                                                                                              |
|                        | Active Dataset                 | DataSet1                                                                                                                                                                                                                                                                                                                                                                                                                                                                                                            |
|                        | Filter                         | <none>                                                                                                                                                                                                                                                                                                                                                                                                                                                                                                              |
|                        | Weight                         | <none>                                                                                                                                                                                                                                                                                                                                                                                                                                                                                                              |
|                        | Split File                     | <none>                                                                                                                                                                                                                                                                                                                                                                                                                                                                                                              |
|                        | N of Rows in Working Data File | 2000                                                                                                                                                                                                                                                                                                                                                                                                                                                                                                                |
| Missing Value Handling | Definition of Missing          | User-defined missing values for factor, subject and within-subject variables are treated as missing.                                                                                                                                                                                                                                                                                                                                                                                                                |
|                        | Cases Used                     | Statistics are based on cases with valid data for all variables in the model.                                                                                                                                                                                                                                                                                                                                                                                                                                       |
| Weight Handling        |                                | not applicable                                                                                                                                                                                                                                                                                                                                                                                                                                                                                                      |
| Syntax                 |                                | <pre> GENLIN mgkg BY bodysystemrecoded Indicateddose Sex (ORDER=ASCENDING) WITH Agemonths Weight@   /MODEL bodysystemrecoded Indicateddose Sex Agemonths Weight@ INTERCEPT=YES DISTRIBUTION=NORMAL LINK=IDENTITY   /CRITERIA SCALE=MLE COVB=MODEL PCONVERGE=1E-006 (ABSOLUTE) SINGULAR=1E-012 ANALYSISTYPE=3(LR)   CILEVEL=95 CITYPE=WALD LIKELIHOOD=FULL   /MISSING CLASSMISSING=EXCLUDE   /PRINT CPS DESCRIPTIVES MODELINFO FIT SUMMARY SOLUTION   /SAVE MEANPRED COOK RESID PEARSONRESID STDPEARSONRESID. </pre> |
| Resources              | Processor Time                 | 00:00:00.71                                                                                                                                                                                                                                                                                                                                                                                                                                                                                                         |
|                        | Elapsed Time                   | 00:00:01.00                                                                                                                                                                                                                                                                                                                                                                                                                                                                                                         |

### Notes

|                               |                                             |                      |
|-------------------------------|---------------------------------------------|----------------------|
| Variables Created or Modified | Predicted Value of the Mean of the Response | MeanPredicted_1      |
|                               | Raw Residual                                | Residual_1           |
|                               | Pearson Residual                            | PearsonResidual_1    |
|                               | Standardized Pearson Residual               | StdPearsonResidual_1 |
|                               | Cook's Distance                             | CooksDistance        |

### Model Information

|                          |          |
|--------------------------|----------|
| Dependent Variable       | mg/kg    |
| Probability Distribution | Normal   |
| Link Function            | Identity |

### Case Processing Summary

|          | N    | Percent |
|----------|------|---------|
| Included | 1886 | 94.3%   |
| Excluded | 114  | 5.7%    |
| Total    | 2000 | 100.0%  |

### Categorical Variable Information

|        |                   | N     | Percent        |
|--------|-------------------|-------|----------------|
| Factor | bodysystemrecoded | 2.00  | 24 1.3%        |
|        |                   | 3.00  | 80 4.2%        |
|        |                   | 4.00  | 22 1.2%        |
|        |                   | 5.00  | 61 3.2%        |
|        |                   | 6.00  | 33 1.7%        |
|        |                   | 7.00  | 10 0.5%        |
|        |                   | 8.00  | 7 0.4%         |
|        |                   | 10.00 | 6 0.3%         |
|        |                   | 11.00 | 1643 87.1%     |
|        |                   | Total | 1886 100.0%    |
|        |                   |       | Indicated dose |
| 2      | 1796 95.2%        |       |                |
| 3      | 80 4.2%           |       |                |
| Total  | 1886 100.0%       |       |                |
|        | Sex               | 0     | 114 6.0%       |
|        |                   | 1     | 736 39.0%      |
|        |                   | 2     | 203 10.8%      |
|        |                   | 3     | 833 44.2%      |
|        |                   | Total | 1886 100.0%    |

### Continuous Variable Information

|                    |              | N    | Minimum    | Maximum    | Mean       |
|--------------------|--------------|------|------------|------------|------------|
| Dependent Variable | mg/kg        | 1886 | .032722513 | 5.00000000 | .915651300 |
| Covariate          | Age (months) | 1886 | 2          | 220        | 75.41      |
|                    | Weight®      | 1886 | 1.56       | 90.00      | 19.3139    |

### Continuous Variable Information

|                    |              | Std. Deviation |
|--------------------|--------------|----------------|
| Dependent Variable | mg/kg        | .516284623     |
| Covariate          | Age (months) | 49.441         |
|                    | Weight®      | 12.57011       |

### Goodness of Fit<sup>a</sup>

|                                      | Value     | df   | Value/df |
|--------------------------------------|-----------|------|----------|
| Deviance                             | 441.413   | 1871 | .236     |
| Scaled Deviance                      | 1886.000  | 1871 |          |
| Pearson Chi-Square                   | 441.413   | 1871 | .236     |
| Scaled Pearson Chi-Square            | 1886.000  | 1871 |          |
| Log Likelihood <sup>b</sup>          | -1306.663 |      |          |
| Akaike's Information Criterion (AIC) | 2645.326  |      |          |
| Finite Sample Corrected AIC (AICC)   | 2645.617  |      |          |
| Bayesian Information Criterion (BIC) | 2734.002  |      |          |
| Consistent AIC (CAIC)                | 2750.002  |      |          |

Dependent Variable: mg/kg

Model: (Intercept), bodysystemrecoded, Indicated dose, Sex, Age (months), Weight®

- Information criteria are in smaller-is-better form.
- The full log likelihood function is displayed and used in computing information criteria.

### Omnibus Test<sup>a</sup>

| Likelihood Ratio Chi-Square | df | Sig. |
|-----------------------------|----|------|
| 244.252                     | 14 | .000 |

Dependent Variable: mg/kg

Model: (Intercept), bodysystemrecoded, Indicated dose, Sex, Age (months), Weight®

- Compares the fitted model against the intercept-only...



### Tests of Model Effects

| Source            | Likelihood<br>Ratio Chi-<br>Square | Type III |       |
|-------------------|------------------------------------|----------|-------|
|                   |                                    | df       | Sig.  |
| (Intercept)       | 394.064                            | 1        | .000  |
| bodysystemrecoded | 40.236                             | 7        | <.001 |
| Indicated dose    | 37.182                             | 1        | <.001 |
| Sex               | 9.449                              | 3        | .024  |
| Age (months)      | 8.751                              | 1        | .003  |
| Weight®           | 30.738                             | 1        | <.001 |

Dependent Variable: mg/kg

Model: (Intercept), bodysystemrecoded, Indicated dose, Sex, Age (months), Weight®

### Parameter Estimates

| Parameter                 | B                 | Std. Error | 95% Wald Confidence Interval |       | Hypothesis Test |
|---------------------------|-------------------|------------|------------------------------|-------|-----------------|
|                           |                   |            | Lower                        | Upper | Wald Chi-Square |
| (Intercept)               | 1.468             | .0804      | 1.311                        | 1.626 | 333.832         |
| [bodysystemrecoded=2.00]  | .111              | .0996      | -.085                        | .306  | 1.232           |
| [bodysystemrecoded=3.00]  | .093              | .0573      | -.020                        | .205  | 2.612           |
| [bodysystemrecoded=4.00]  | .270              | .1047      | .064                         | .475  | 6.629           |
| [bodysystemrecoded=5.00]  | .293              | .0670      | .161                         | .424  | 19.065          |
| [bodysystemrecoded=6.00]  | .489              | .1116      | .270                         | .707  | 19.183          |
| [bodysystemrecoded=7.00]  | -1.019            | .1708      | -1.354                       | -.684 | 35.597          |
| [bodysystemrecoded=8.00]  | .036              | .1880      | -.333                        | .404  | .036            |
| [bodysystemrecoded=10.00] | .188              | .1981      | -.201                        | .576  | .898            |
| [bodysystemrecoded=11.00] | 0 <sup>a</sup>    | .          | .                            | .     | .               |
| [Indicated dose=1]        | 0 <sup>a</sup>    | .          | .                            | .     | .               |
| [Indicated dose=2]        | -.461             | .0752      | -.608                        | -.313 | 37.551          |
| [Indicated dose=3]        | 0 <sup>a</sup>    | .          | .                            | .     | .               |
| [Sex=0]                   | .145              | .0487      | .050                         | .241  | 8.917           |
| [Sex=1]                   | .011              | .0246      | -.037                        | .059  | .209            |
| [Sex=2]                   | .042              | .0384      | -.034                        | .117  | 1.175           |
| [Sex=3]                   | 0 <sup>a</sup>    | .          | .                            | .     | .               |
| Age (months)              | -.001             | .0002      | -.001                        | .000  | 8.771           |
| Weight®                   | -.005             | .0009      | -.007                        | -.003 | 30.990          |
| (Scale)                   | .234 <sup>b</sup> | .0076      | .220                         | .249  |                 |

## Parameter Estimates

| Parameter                 | Hypothesis Test |       |
|---------------------------|-----------------|-------|
|                           | df              | Sig.  |
| (Intercept)               | 1               | .000  |
| [bodysystemrecoded=2.00]  | 1               | .267  |
| [bodysystemrecoded=3.00]  | 1               | .106  |
| [bodysystemrecoded=4.00]  | 1               | .010  |
| [bodysystemrecoded=5.00]  | 1               | <.001 |
| [bodysystemrecoded=6.00]  | 1               | <.001 |
| [bodysystemrecoded=7.00]  | 1               | <.001 |
| [bodysystemrecoded=8.00]  | 1               | .849  |
| [bodysystemrecoded=10.00] | 1               | .343  |
| [bodysystemrecoded=11.00] | .               | .     |
| [Indicated dose=1]        | .               | .     |
| [Indicated dose=2]        | 1               | <.001 |
| [Indicated dose=3]        | .               | .     |
| [Sex=0]                   | 1               | .003  |
| [Sex=1]                   | 1               | .647  |
| [Sex=2]                   | 1               | .278  |
| [Sex=3]                   | .               | .     |
| Age (months)              | 1               | .003  |
| Weight@                   | 1               | <.001 |
| (Scale)                   |                 |       |

Dependent Variable: mg/kg

Model: (Intercept), bodysystemrecoded, Indicated dose, Sex, Age (months), Weight@

- a. Set to zero because this parameter is redundant.
- b. Maximum likelihood estimate.

## GGraph

## Notes

|                |                                                                                                                                                                                                                                                                                                                                                                                                                                                                                                                                                                                                                                                |                                                                               |
|----------------|------------------------------------------------------------------------------------------------------------------------------------------------------------------------------------------------------------------------------------------------------------------------------------------------------------------------------------------------------------------------------------------------------------------------------------------------------------------------------------------------------------------------------------------------------------------------------------------------------------------------------------------------|-------------------------------------------------------------------------------|
| Output Created |                                                                                                                                                                                                                                                                                                                                                                                                                                                                                                                                                                                                                                                | 13-JUL-2022 17:28:53                                                          |
| Comments       |                                                                                                                                                                                                                                                                                                                                                                                                                                                                                                                                                                                                                                                |                                                                               |
| Input          | Data                                                                                                                                                                                                                                                                                                                                                                                                                                                                                                                                                                                                                                           | /Users/bonniepurcell/De<br>sktop/SPSS /SPSS Whole<br>data set correct sex.sav |
|                | Active Dataset                                                                                                                                                                                                                                                                                                                                                                                                                                                                                                                                                                                                                                 | DataSet1                                                                      |
|                | Filter                                                                                                                                                                                                                                                                                                                                                                                                                                                                                                                                                                                                                                         | <none>                                                                        |
|                | Weight                                                                                                                                                                                                                                                                                                                                                                                                                                                                                                                                                                                                                                         | <none>                                                                        |
|                | Split File                                                                                                                                                                                                                                                                                                                                                                                                                                                                                                                                                                                                                                     | <none>                                                                        |
|                | N of Rows in Working Data<br>File                                                                                                                                                                                                                                                                                                                                                                                                                                                                                                                                                                                                              | 2000                                                                          |
| Syntax         | <pre>GGRAPH   /GRAPHDATASET   NAME="graphdataset"   VARIABLES=mgkg   CooksDistance   MISSING=LISTWISE   REPORTMISSING=NO   /GRAPHSPEC   SOURCE=INLINE   /FITLINE TOTAL=NO   SUBGROUP=NO.   BEGIN GPL     SOURCE: s=userSource     (id("graphdataset"))     DATA: mgkg=col     (source(s), name("mgkg"))     DATA:     CooksDistance=col     (source(s), name     ("CooksDistance"))     GUIDE: axis(dim(1),     label("mg/kg"))     GUIDE: axis(dim(2),     label("Cook's Distance"))     GUIDE: text.title(label     ("Scatter Plot of Cook's     Distance by mg/kg"))     ELEMENT: point(position     (mgkg*CooksDistance))   END GPL.</pre> |                                                                               |
| Resources      | Processor Time                                                                                                                                                                                                                                                                                                                                                                                                                                                                                                                                                                                                                                 | 00:00:00.26                                                                   |
|                | Elapsed Time                                                                                                                                                                                                                                                                                                                                                                                                                                                                                                                                                                                                                                   | 00:00:00.00                                                                   |

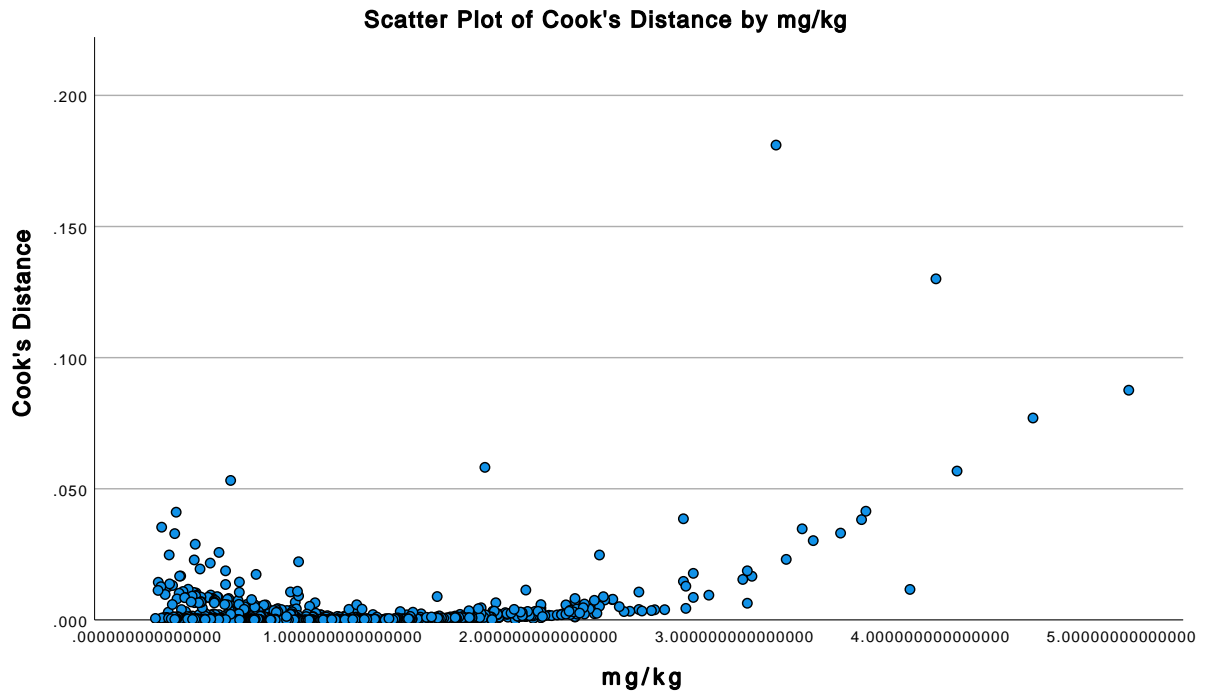

## Generalized Linear Models

### Notes

|                        |                                |                                                                                                      |
|------------------------|--------------------------------|------------------------------------------------------------------------------------------------------|
| Output Created         |                                | 13-JUL-2022 17:42:40                                                                                 |
| Comments               |                                |                                                                                                      |
| Input                  | Data                           | /Users/bonniepurcell/Desktop/SPSS /SPSS Whole data set correct sex.sav                               |
|                        | Active Dataset                 | DataSet1                                                                                             |
|                        | Filter                         | CooksDistance <= 0.05 (FILTER)                                                                       |
|                        | Weight                         | <none>                                                                                               |
|                        | Split File                     | <none>                                                                                               |
|                        | N of Rows in Working Data File | 1991                                                                                                 |
| Missing Value Handling | Definition of Missing          | User-defined missing values for factor, subject and within-subject variables are treated as missing. |
|                        | Cases Used                     | Statistics are based on cases with valid data for all variables in the model.                        |
| Weight Handling        |                                | not applicable                                                                                       |

## Notes

|                               |                                                                                                                                                                                                                                                                                                                                                                                                                                                                                                         |                      |
|-------------------------------|---------------------------------------------------------------------------------------------------------------------------------------------------------------------------------------------------------------------------------------------------------------------------------------------------------------------------------------------------------------------------------------------------------------------------------------------------------------------------------------------------------|----------------------|
| Syntax                        | <pre> GENLIN mgkg BY bodysystemrecoded Indicateddose Sex (ORDER=ASCENDING) WITH Agemonths Weight@ /MODEL bodysystemrecoded Indicateddose Sex Agemonths Weight@ INTERCEPT=YES DISTRIBUTION=NORMAL LINK=IDENTITY /CRITERIA SCALE=MLE COVB=MODEL PCONVERGE=1E-006 (ABSOLUTE) SINGULAR=1E-012 ANALYSISTYPE=3(LR) CILEVEL=95 CITYPE=WALD LIKELIHOOD=FULL /MISSING CLASSMISSING=EXCLUDE /PRINT CPS DESCRIPTIVES MODELINFO FIT SUMMARY SOLUTION /SAVE MEANPRED COOK RESID PEARSONRESID STDPEARSONRESID. </pre> |                      |
| Resources                     | Processor Time                                                                                                                                                                                                                                                                                                                                                                                                                                                                                          | 00:00:00.68          |
|                               | Elapsed Time                                                                                                                                                                                                                                                                                                                                                                                                                                                                                            | 00:00:01.00          |
| Variables Created or Modified | Predicted Value of the Mean of the Response                                                                                                                                                                                                                                                                                                                                                                                                                                                             | MeanPredicted_2      |
|                               | Raw Residual                                                                                                                                                                                                                                                                                                                                                                                                                                                                                            | Residual_2           |
|                               | Pearson Residual                                                                                                                                                                                                                                                                                                                                                                                                                                                                                        | PearsonResidual_2    |
|                               | Standardized Pearson Residual                                                                                                                                                                                                                                                                                                                                                                                                                                                                           | StdPearsonResidual_2 |
|                               | Cook's Distance                                                                                                                                                                                                                                                                                                                                                                                                                                                                                         | CooksDistance_1      |

### Model Information

|                          |          |
|--------------------------|----------|
| Dependent Variable       | mg/kg    |
| Probability Distribution | Normal   |
| Link Function            | Identity |

### Case Processing Summary

|          | N    | Percent |
|----------|------|---------|
| Included | 1879 | 94.4%   |
| Excluded | 112  | 5.6%    |
| Total    | 1991 | 100.0%  |

### Categorical Variable Information

|        |                   | N              | Percent |        |
|--------|-------------------|----------------|---------|--------|
| Factor | bodysystemrecoded | 2.00           | 24      | 1.3%   |
|        |                   | 3.00           | 79      | 4.2%   |
|        |                   | 4.00           | 21      | 1.1%   |
|        |                   | 5.00           | 61      | 3.2%   |
|        |                   | 6.00           | 31      | 1.6%   |
|        |                   | 7.00           | 10      | 0.5%   |
|        |                   | 8.00           | 4       | 0.2%   |
|        |                   | 10.00          | 6       | 0.3%   |
|        |                   | 11.00          | 1643    | 87.4%  |
|        |                   | Total          | 1879    | 100.0% |
|        |                   | Indicated dose | 1       | 10     |
| 2      | 1793              |                | 95.4%   |        |
| 3      | 76                |                | 4.0%    |        |
| Total  | 1879              |                | 100.0%  |        |
| Sex    | 0                 | 113            | 6.0%    |        |
|        | 1                 | 734            | 39.1%   |        |
|        | 2                 | 203            | 10.8%   |        |
|        | 3                 | 829            | 44.1%   |        |
|        | Total             | 1879           | 100.0%  |        |

### Continuous Variable Information

|                    |              | N    | Minimum    | Maximum    | Mean       |
|--------------------|--------------|------|------------|------------|------------|
| Dependent Variable | mg/kg        | 1879 | .032722513 | 3.88349515 | .906831477 |
| Covariate          | Age (months) | 1879 | 2          | 220        | 75.38      |
|                    | Weight®      | 1879 | 1.56       | 90.00      | 19.3223    |

### Continuous Variable Information

|                    |              | Std. Deviation |
|--------------------|--------------|----------------|
| Dependent Variable | mg/kg        | .487697711     |
| Covariate          | Age (months) | 49.433         |
|                    | Weight®      | 12.57661       |

### Goodness of Fit<sup>a</sup>

|                                      | Value     | df   | Value/df |
|--------------------------------------|-----------|------|----------|
| Deviance                             | 398.163   | 1864 | .214     |
| Scaled Deviance                      | 1879.000  | 1864 |          |
| Pearson Chi-Square                   | 398.163   | 1864 | .214     |
| Scaled Pearson Chi-Square            | 1879.000  | 1864 |          |
| Log Likelihood <sup>b</sup>          | -1208.425 |      |          |
| Akaike's Information Criterion (AIC) | 2448.851  |      |          |
| Finite Sample Corrected AIC (AICC)   | 2449.143  |      |          |
| Bayesian Information Criterion (BIC) | 2537.467  |      |          |
| Consistent AIC (CAIC)                | 2553.467  |      |          |

Dependent Variable: mg/kg

Model: (Intercept), bodysystemrecoded, Indicated dose, Sex, Age (months), Weight<sup>®</sup>

- a. Information criteria are in smaller-is-better form.
- b. The full log likelihood function is displayed and used in computing information criteria.

### Omnibus Test<sup>a</sup>

| Likelihood Ratio Chi-Square | df | Sig. |
|-----------------------------|----|------|
| 216.052                     | 14 | .000 |

Dependent Variable: mg/kg

Model: (Intercept), bodysystemrecoded, Indicated dose, Sex, Age (months), Weight<sup>®</sup>

- a. Compares the fitted model against the intercept-only...

### Tests of Model Effects

| Source              | Likelihood Ratio Chi-Square | Type III |       |
|---------------------|-----------------------------|----------|-------|
|                     |                             | df       | Sig.  |
| (Intercept)         | 346.080                     | 1        | .000  |
| bodysystemrecoded   | 32.941                      | 7        | <.001 |
| Indicated dose      | 40.318                      | 1        | <.001 |
| Sex                 | 9.432                       | 3        | .024  |
| Age (months)        | 7.808                       | 1        | .005  |
| Weight <sup>®</sup> | 30.802                      | 1        | <.001 |

Dependent Variable: mg/kg

Model: (Intercept), bodysystemrecoded, Indicated dose, Sex, Age (months), Weight<sup>®</sup>

### Parameter Estimates

| Parameter                 | B                 | Std. Error | 95% Wald Confidence Interval |       | Hypothesis Test |
|---------------------------|-------------------|------------|------------------------------|-------|-----------------|
|                           |                   |            | Lower                        | Upper | Wald Chi-Square |
| (Intercept)               | 1.458             | .0772      | 1.306                        | 1.609 | 356.981         |
| [bodysystemrecoded=2.00]  | .109              | .0948      | -.077                        | .295  | 1.326           |
| [bodysystemrecoded=3.00]  | .040              | .0549      | -.068                        | .147  | .526            |
| [bodysystemrecoded=4.00]  | .132              | .1019      | -.068                        | .332  | 1.678           |
| [bodysystemrecoded=5.00]  | .291              | .0638      | .166                         | .416  | 20.752          |
| [bodysystemrecoded=6.00]  | .328              | .1084      | .115                         | .540  | 9.138           |
| [bodysystemrecoded=7.00]  | -1.020            | .1627      | -1.339                       | -.701 | 39.306          |
| [bodysystemrecoded=8.00]  | -.396             | .2332      | -.853                        | .061  | 2.889           |
| [bodysystemrecoded=10.00] | .190              | .1885      | -.179                        | .560  | 1.020           |
| [bodysystemrecoded=11.00] | 0 <sup>a</sup>    | .          | .                            | .     | .               |
| [Indicated dose=1]        | 0 <sup>a</sup>    | .          | .                            | .     | .               |
| [Indicated dose=2]        | -.461             | .0722      | -.602                        | -.319 | 40.754          |
| [Indicated dose=3]        | 0 <sup>a</sup>    | .          | .                            | .     | .               |
| [Sex=0]                   | .137              | .0465      | .046                         | .228  | 8.652           |
| [Sex=1]                   | .013              | .0234      | -.033                        | .059  | .294            |
| [Sex=2]                   | .047              | .0366      | -.025                        | .118  | 1.627           |
| [Sex=3]                   | 0 <sup>a</sup>    | .          | .                            | .     | .               |
| Age (months)              | -.001             | .0002      | -.001                        | .000  | 7.824           |
| Weight@                   | -.005             | .0009      | -.007                        | -.003 | 31.056          |
| (Scale)                   | .212 <sup>b</sup> | .0069      | .199                         | .226  |                 |



## Parameter Estimates

| Parameter                 | Hypothesis Test |       |
|---------------------------|-----------------|-------|
|                           | df              | Sig.  |
| (Intercept)               | 1               | .000  |
| [bodysystemrecoded=2.00]  | 1               | .249  |
| [bodysystemrecoded=3.00]  | 1               | .468  |
| [bodysystemrecoded=4.00]  | 1               | .195  |
| [bodysystemrecoded=5.00]  | 1               | <.001 |
| [bodysystemrecoded=6.00]  | 1               | .003  |
| [bodysystemrecoded=7.00]  | 1               | <.001 |
| [bodysystemrecoded=8.00]  | 1               | .089  |
| [bodysystemrecoded=10.00] | 1               | .313  |
| [bodysystemrecoded=11.00] | .               | .     |
| [Indicated dose=1]        | .               | .     |
| [Indicated dose=2]        | 1               | <.001 |
| [Indicated dose=3]        | .               | .     |
| [Sex=0]                   | 1               | .003  |
| [Sex=1]                   | 1               | .588  |
| [Sex=2]                   | 1               | .202  |
| [Sex=3]                   | .               | .     |
| Age (months)              | 1               | .005  |
| Weight@                   | 1               | <.001 |
| (Scale)                   |                 |       |

Dependent Variable: mg/kg

Model: (Intercept), bodysystemrecoded, Indicated dose, Sex, Age (months), Weight@

- a. Set to zero because this parameter is redundant.
- b. Maximum likelihood estimate.

## GGraph

## Notes

|                |                                                                                                                                                                                                                                                                                                                                                                                                                                                                                                            |                                                                        |
|----------------|------------------------------------------------------------------------------------------------------------------------------------------------------------------------------------------------------------------------------------------------------------------------------------------------------------------------------------------------------------------------------------------------------------------------------------------------------------------------------------------------------------|------------------------------------------------------------------------|
| Output Created |                                                                                                                                                                                                                                                                                                                                                                                                                                                                                                            | 13-JUL-2022 17:49:22                                                   |
| Comments       |                                                                                                                                                                                                                                                                                                                                                                                                                                                                                                            |                                                                        |
| Input          | Data                                                                                                                                                                                                                                                                                                                                                                                                                                                                                                       | /Users/bonniepurcell/Desktop/SPSS /SPSS Whole data set correct sex.sav |
|                | Active Dataset                                                                                                                                                                                                                                                                                                                                                                                                                                                                                             | DataSet1                                                               |
|                | Filter                                                                                                                                                                                                                                                                                                                                                                                                                                                                                                     | CooksDistance <= 0.05 (FILTER)                                         |
|                | Weight                                                                                                                                                                                                                                                                                                                                                                                                                                                                                                     | <none>                                                                 |
|                | Split File                                                                                                                                                                                                                                                                                                                                                                                                                                                                                                 | <none>                                                                 |
|                | N of Rows in Working Data File                                                                                                                                                                                                                                                                                                                                                                                                                                                                             | 1991                                                                   |
| Syntax         | <pre>GGRAPH /GRAPHDATASET NAME="graphdataset" VARIABLES=Residual_2 MISSING=LISTWISE REPORTMISSING=NO /GRAPHSPEC SOURCE=INLINE. BEGIN GPL SOURCE: s=userSource (id("graphdataset")) DATA: Residual_2=col (source(s), name ("Residual_2")) GUIDE: axis(dim(1), label("Raw Residual")) GUIDE: axis(dim(2), label("Frequency")) GUIDE: text.title(label ("Simple Histogram of Raw Residual")) ELEMENT: interval (position(summary.count (bin.rect(Residual_2))), shape.interior(shape. square)) END GPL.</pre> |                                                                        |
| Resources      | Processor Time                                                                                                                                                                                                                                                                                                                                                                                                                                                                                             | 00:00:00.35                                                            |
|                | Elapsed Time                                                                                                                                                                                                                                                                                                                                                                                                                                                                                               | 00:00:00.00                                                            |

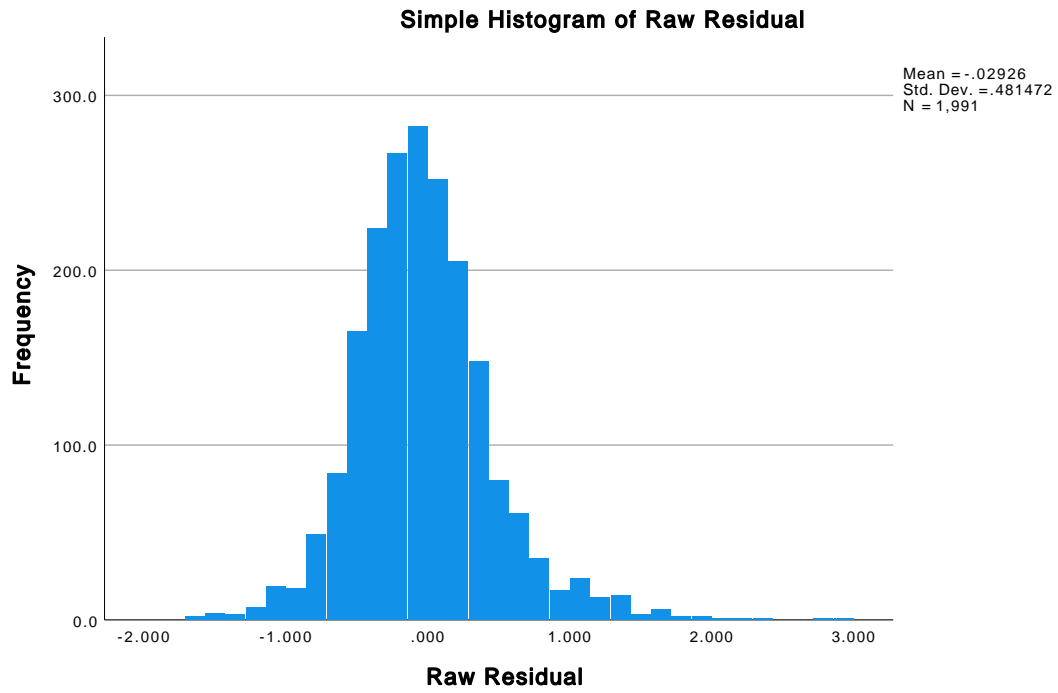

## GGraph

### Notes

|                |                                |                                                                        |
|----------------|--------------------------------|------------------------------------------------------------------------|
| Output Created |                                | 13-JUL-2022 17:50:17                                                   |
| Comments       |                                |                                                                        |
| Input          | Data                           | /Users/bonniepurcell/Desktop/SPSS /SPSS Whole data set correct sex.sav |
|                | Active Dataset                 | DataSet1                                                               |
|                | Filter                         | CooksDistance <= 0.05 (FILTER)                                         |
|                | Weight                         | <none>                                                                 |
|                | Split File                     | <none>                                                                 |
|                | N of Rows in Working Data File | 1991                                                                   |

## Notes

|                |                                                                                                                                                                                                                                                                                                                                                                                                                                                                                                                                                                                                     |                |             |              |             |
|----------------|-----------------------------------------------------------------------------------------------------------------------------------------------------------------------------------------------------------------------------------------------------------------------------------------------------------------------------------------------------------------------------------------------------------------------------------------------------------------------------------------------------------------------------------------------------------------------------------------------------|----------------|-------------|--------------|-------------|
| Syntax         | <pre>GGRAPH /GRAPHDATASET NAME="graphdataset" VARIABLES=mgkg MeanPredicted_2 MISSING=LISTWISE REPORTMISSING=NO /GRAPHSPEC SOURCE=INLINE /FITLINE TOTAL=NO SUBGROUP=NO. BEGIN GPL SOURCE: s=userSource (id("graphdataset")) DATA: mgkg=col (source(s), name("mgkg")) DATA: MeanPredicted_2=col (source(s), name ("MeanPredicted_2")) GUIDE: axis(dim(1), label("mg/kg")) GUIDE: axis(dim(2), label("Predicted Value of Mean of Response")) GUIDE: text.title(label ("Scatter Plot of Predicted Value of Mean of Response by mg/kg")) ELEMENT: point(position (mgkg*MeanPredicted_2) ) END GPL.</pre> |                |             |              |             |
| Resources      | <table border="1"> <tr> <td style="background-color: #e0e0e0;">Processor Time</td> <td>00:00:00.22</td> </tr> <tr> <td style="background-color: #e0e0e0;">Elapsed Time</td> <td>00:00:00.00</td> </tr> </table>                                                                                                                                                                                                                                                                                                                                                                                     | Processor Time | 00:00:00.22 | Elapsed Time | 00:00:00.00 |
| Processor Time | 00:00:00.22                                                                                                                                                                                                                                                                                                                                                                                                                                                                                                                                                                                         |                |             |              |             |
| Elapsed Time   | 00:00:00.00                                                                                                                                                                                                                                                                                                                                                                                                                                                                                                                                                                                         |                |             |              |             |

**Scatter Plot of Predicted Value of Mean of Response by mg/kg**

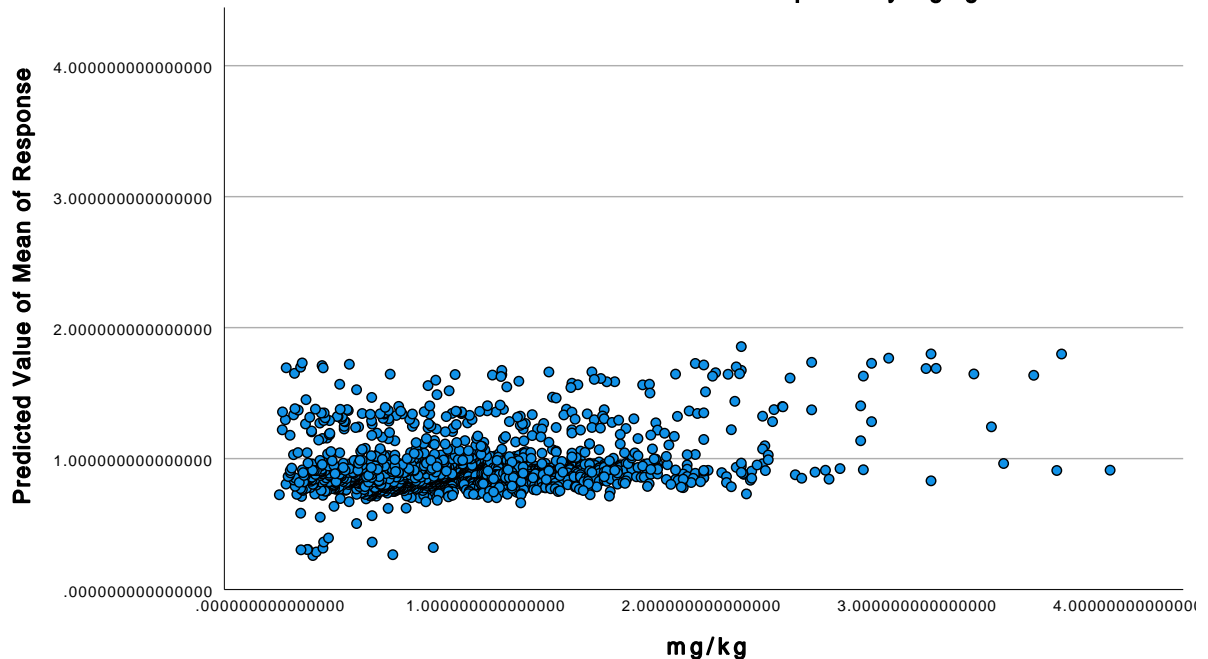

## GGraph

### Notes

|                |                                                                                                                                                                                                                                                                                                                                                                                                                                                                                                                                                                                                                                                                    |                                                                        |
|----------------|--------------------------------------------------------------------------------------------------------------------------------------------------------------------------------------------------------------------------------------------------------------------------------------------------------------------------------------------------------------------------------------------------------------------------------------------------------------------------------------------------------------------------------------------------------------------------------------------------------------------------------------------------------------------|------------------------------------------------------------------------|
| Output Created |                                                                                                                                                                                                                                                                                                                                                                                                                                                                                                                                                                                                                                                                    | 13-JUL-2022 17:51:38                                                   |
| Comments       |                                                                                                                                                                                                                                                                                                                                                                                                                                                                                                                                                                                                                                                                    |                                                                        |
| Input          | Data                                                                                                                                                                                                                                                                                                                                                                                                                                                                                                                                                                                                                                                               | /Users/bonniepurcell/Desktop/SPSS /SPSS Whole data set correct sex.sav |
|                | Active Dataset                                                                                                                                                                                                                                                                                                                                                                                                                                                                                                                                                                                                                                                     | DataSet1                                                               |
|                | Filter                                                                                                                                                                                                                                                                                                                                                                                                                                                                                                                                                                                                                                                             | CooksDistance <= 0.05 (FILTER)                                         |
|                | Weight                                                                                                                                                                                                                                                                                                                                                                                                                                                                                                                                                                                                                                                             | <none>                                                                 |
|                | Split File                                                                                                                                                                                                                                                                                                                                                                                                                                                                                                                                                                                                                                                         | <none>                                                                 |
|                | N of Rows in Working Data File                                                                                                                                                                                                                                                                                                                                                                                                                                                                                                                                                                                                                                     | 1991                                                                   |
| Syntax         | <pre> GGRAPH   /GRAPHDATASET   NAME="graphdataset"   VARIABLES=mgkg   CooksDistance_1   MISSING=LISTWISE   REPORTMISSING=NO   /GRAPHSPEC   SOURCE=INLINE   /FITLINE TOTAL=NO   SUBGROUP=NO.   BEGIN GPL     SOURCE: s=userSource     (id("graphdataset"))     DATA: mgkg=col     (source(s), name("mgkg"))     DATA:     CooksDistance_1=col     (source(s), name     ("CooksDistance_1"))     GUIDE: axis(dim(1),     label("mg/kg"))     GUIDE: axis(dim(2),     label("Cook's Distance"))     GUIDE: text.title(label     ("Scatter Plot of Cook's     Distance by mg/kg"))     ELEMENT: point(position     (mgkg*CooksDistance_1))   END GPL.           </pre> |                                                                        |
| Resources      | Processor Time                                                                                                                                                                                                                                                                                                                                                                                                                                                                                                                                                                                                                                                     | 00:00:00.24                                                            |
|                | Elapsed Time                                                                                                                                                                                                                                                                                                                                                                                                                                                                                                                                                                                                                                                       | 00:00:00.00                                                            |

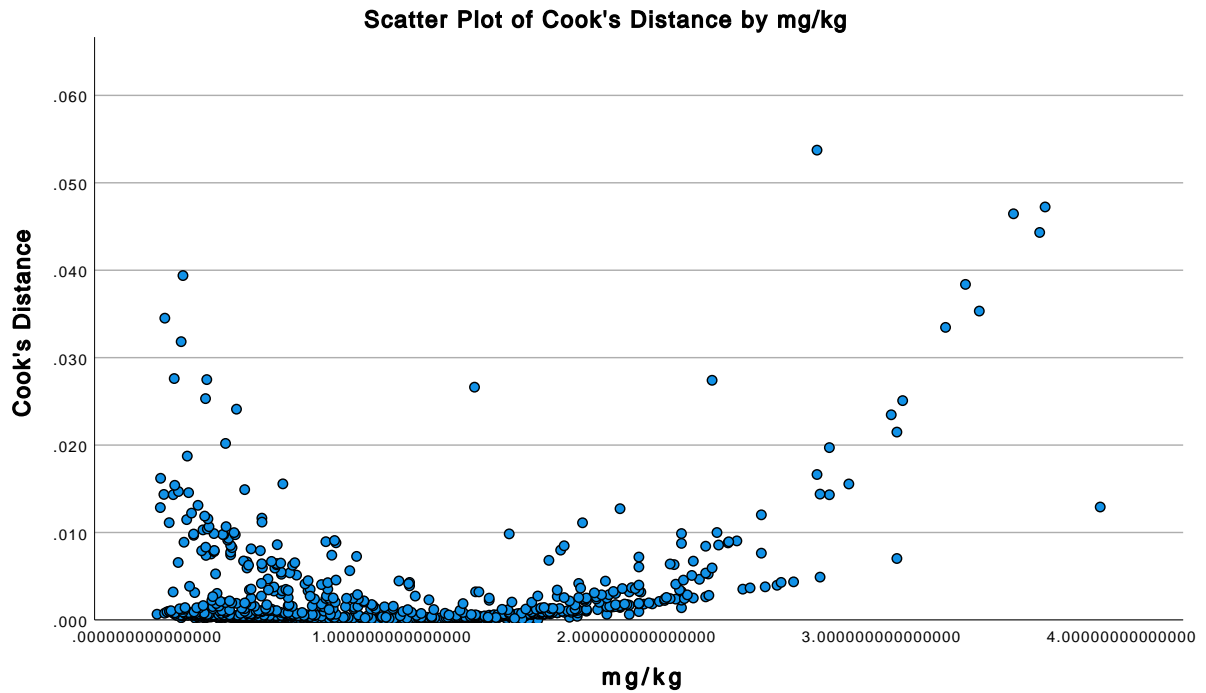

## Generalized Linear Models

### Notes

|                        |                                |                                                                                                      |
|------------------------|--------------------------------|------------------------------------------------------------------------------------------------------|
| Output Created         |                                | 15-JUL-2022 13:53:01                                                                                 |
| Comments               |                                |                                                                                                      |
| Input                  | Data                           | /Users/bonniepurcell/Desktop/SPSS /SPSS Whole data set correct sex.sav                               |
|                        | Active Dataset                 | DataSet1                                                                                             |
|                        | Filter                         | CooksDistance <= 0.05 (FILTER)                                                                       |
|                        | Weight                         | <none>                                                                                               |
|                        | Split File                     | <none>                                                                                               |
|                        | N of Rows in Working Data File | 1991                                                                                                 |
| Missing Value Handling | Definition of Missing          | User-defined missing values for factor, subject and within-subject variables are treated as missing. |
|                        | Cases Used                     | Statistics are based on cases with valid data for all variables in the model.                        |
| Weight Handling        |                                | not applicable                                                                                       |

## Notes

|                               |                                                                                                                                                                                                                                                                                                                                                                                                                                                                                                         |                      |
|-------------------------------|---------------------------------------------------------------------------------------------------------------------------------------------------------------------------------------------------------------------------------------------------------------------------------------------------------------------------------------------------------------------------------------------------------------------------------------------------------------------------------------------------------|----------------------|
| Syntax                        | <pre> GENLIN mgkg BY Indicateddose bodysystemrecoded Sex (ORDER=ASCENDING) WITH Agemonths Weight@ /MODEL bodysystemrecoded Indicateddose Sex Agemonths Weight@ INTERCEPT=YES DISTRIBUTION=NORMAL LINK=IDENTITY /CRITERIA SCALE=MLE COVB=MODEL PCONVERGE=1E-006 (ABSOLUTE) SINGULAR=1E-012 ANALYSISTYPE=3(LR) CILEVEL=95 CITYPE=WALD LIKELIHOOD=FULL /MISSING CLASSMISSING=EXCLUDE /PRINT CPS DESCRIPTIVES MODELINFO FIT SUMMARY SOLUTION /SAVE MEANPRED COOK RESID PEARSONRESID STDPEARSONRESID. </pre> |                      |
| Resources                     | Processor Time                                                                                                                                                                                                                                                                                                                                                                                                                                                                                          | 00:00:00.66          |
|                               | Elapsed Time                                                                                                                                                                                                                                                                                                                                                                                                                                                                                            | 00:00:00.00          |
| Variables Created or Modified | Predicted Value of the Mean of the Response                                                                                                                                                                                                                                                                                                                                                                                                                                                             | MeanPredicted_3      |
|                               | Raw Residual                                                                                                                                                                                                                                                                                                                                                                                                                                                                                            | Residual_3           |
|                               | Pearson Residual                                                                                                                                                                                                                                                                                                                                                                                                                                                                                        | PearsonResidual_3    |
|                               | Standardized Pearson Residual                                                                                                                                                                                                                                                                                                                                                                                                                                                                           | StdPearsonResidual_3 |
|                               | Cook's Distance                                                                                                                                                                                                                                                                                                                                                                                                                                                                                         | CooksDistance_2      |

### Model Information

|                          |          |
|--------------------------|----------|
| Dependent Variable       | mg/kg    |
| Probability Distribution | Normal   |
| Link Function            | Identity |

### Case Processing Summary

|          | N    | Percent |
|----------|------|---------|
| Included | 1879 | 94.4%   |
| Excluded | 112  | 5.6%    |
| Total    | 1991 | 100.0%  |

### Categorical Variable Information

|                   |                | N     | Percent |        |
|-------------------|----------------|-------|---------|--------|
| Factor            | Indicated dose | 1     | 10      | 0.5%   |
|                   |                | 2     | 1793    | 95.4%  |
|                   |                | 3     | 76      | 4.0%   |
|                   |                | Total | 1879    | 100.0% |
| bodysystemrecoded | 2.00           | 24    | 1.3%    |        |
|                   | 3.00           | 79    | 4.2%    |        |
|                   | 4.00           | 21    | 1.1%    |        |
|                   | 5.00           | 61    | 3.2%    |        |
|                   | 6.00           | 31    | 1.6%    |        |
|                   | 7.00           | 10    | 0.5%    |        |
|                   | 8.00           | 4     | 0.2%    |        |
|                   | 10.00          | 6     | 0.3%    |        |
|                   | 11.00          | 1643  | 87.4%   |        |
|                   | Total          | 1879  | 100.0%  |        |
|                   | Sex            | 0     | 113     | 6.0%   |
| 1                 |                | 734   | 39.1%   |        |
| 2                 |                | 203   | 10.8%   |        |
| 3                 |                | 829   | 44.1%   |        |
| Total             |                | 1879  | 100.0%  |        |

### Continuous Variable Information

|                    |              | N    | Minimum    | Maximum    | Mean       |
|--------------------|--------------|------|------------|------------|------------|
| Dependent Variable | mg/kg        | 1879 | .032722513 | 3.88349515 | .906831477 |
| Covariate          | Age (months) | 1879 | 2          | 220        | 75.38      |
|                    | Weight®      | 1879 | 1.56       | 90.00      | 19.3223    |

### Continuous Variable Information

|                    |              | Std. Deviation |
|--------------------|--------------|----------------|
| Dependent Variable | mg/kg        | .487697711     |
| Covariate          | Age (months) | 49.433         |
|                    | Weight®      | 12.57661       |



### Goodness of Fit<sup>a</sup>

|                                      | Value     | df   | Value/df |
|--------------------------------------|-----------|------|----------|
| Deviance                             | 398.163   | 1864 | .214     |
| Scaled Deviance                      | 1879.000  | 1864 |          |
| Pearson Chi-Square                   | 398.163   | 1864 | .214     |
| Scaled Pearson Chi-Square            | 1879.000  | 1864 |          |
| Log Likelihood <sup>b</sup>          | -1208.425 |      |          |
| Akaike's Information Criterion (AIC) | 2448.851  |      |          |
| Finite Sample Corrected AIC (AICC)   | 2449.143  |      |          |
| Bayesian Information Criterion (BIC) | 2537.467  |      |          |
| Consistent AIC (CAIC)                | 2553.467  |      |          |

Dependent Variable: mg/kg

Model: (Intercept), bodysystemrecoded, Indicated dose, Sex, Age (months), Weight<sup>®</sup>

- Information criteria are in smaller-is-better form.
- The full log likelihood function is displayed and used in computing information criteria.

### Omnibus Test<sup>a</sup>

| Likelihood Ratio Chi-Square | df | Sig. |
|-----------------------------|----|------|
| 216.052                     | 14 | .000 |

Dependent Variable: mg/kg

Model: (Intercept), bodysystemrecoded, Indicated dose, Sex, Age (months), Weight<sup>®</sup>

- Compares the fitted model against the intercept-only...

### Tests of Model Effects

| Source              | Likelihood Ratio Chi-Square | Type III |       |
|---------------------|-----------------------------|----------|-------|
|                     |                             | df       | Sig.  |
| (Intercept)         | 346.080                     | 1        | .000  |
| bodysystemrecoded   | 32.941                      | 7        | <.001 |
| Indicated dose      | 40.318                      | 1        | <.001 |
| Sex                 | 9.432                       | 3        | .024  |
| Age (months)        | 7.808                       | 1        | .005  |
| Weight <sup>®</sup> | 30.802                      | 1        | <.001 |

Dependent Variable: mg/kg

Model: (Intercept), bodysystemrecoded, Indicated dose, Sex, Age (months), Weight<sup>®</sup>

### Parameter Estimates

| Parameter                 | B                 | Std. Error | 95% Wald Confidence Interval |       | Hypothesis Test |
|---------------------------|-------------------|------------|------------------------------|-------|-----------------|
|                           |                   |            | Lower                        | Upper | Wald Chi-Square |
| (Intercept)               | 1.458             | .0772      | 1.306                        | 1.609 | 356.981         |
| [bodysystemrecoded=2.00]  | .109              | .0948      | -.077                        | .295  | 1.326           |
| [bodysystemrecoded=3.00]  | .040              | .0549      | -.068                        | .147  | .526            |
| [bodysystemrecoded=4.00]  | .132              | .1019      | -.068                        | .332  | 1.678           |
| [bodysystemrecoded=5.00]  | .291              | .0638      | .166                         | .416  | 20.752          |
| [bodysystemrecoded=6.00]  | .328              | .1084      | .115                         | .540  | 9.138           |
| [bodysystemrecoded=7.00]  | -1.020            | .1627      | -1.339                       | -.701 | 39.306          |
| [bodysystemrecoded=8.00]  | -.396             | .2332      | -.853                        | .061  | 2.889           |
| [bodysystemrecoded=10.00] | .190              | .1885      | -.179                        | .560  | 1.020           |
| [bodysystemrecoded=11.00] | 0 <sup>a</sup>    | .          | .                            | .     | .               |
| [Indicated dose=1]        | 0 <sup>a</sup>    | .          | .                            | .     | .               |
| [Indicated dose=2]        | -.461             | .0722      | -.602                        | -.319 | 40.754          |
| [Indicated dose=3]        | 0 <sup>a</sup>    | .          | .                            | .     | .               |
| [Sex=0]                   | .137              | .0465      | .046                         | .228  | 8.652           |
| [Sex=1]                   | .013              | .0234      | -.033                        | .059  | .294            |
| [Sex=2]                   | .047              | .0366      | -.025                        | .118  | 1.627           |
| [Sex=3]                   | 0 <sup>a</sup>    | .          | .                            | .     | .               |
| Age (months)              | -.001             | .0002      | -.001                        | .000  | 7.824           |
| Weight@                   | -.005             | .0009      | -.007                        | -.003 | 31.056          |
| (Scale)                   | .212 <sup>b</sup> | .0069      | .199                         | .226  |                 |

## Parameter Estimates

| Parameter                 | Hypothesis Test |       |
|---------------------------|-----------------|-------|
|                           | df              | Sig.  |
| (Intercept)               | 1               | .000  |
| [bodysystemrecoded=2.00]  | 1               | .249  |
| [bodysystemrecoded=3.00]  | 1               | .468  |
| [bodysystemrecoded=4.00]  | 1               | .195  |
| [bodysystemrecoded=5.00]  | 1               | <.001 |
| [bodysystemrecoded=6.00]  | 1               | .003  |
| [bodysystemrecoded=7.00]  | 1               | <.001 |
| [bodysystemrecoded=8.00]  | 1               | .089  |
| [bodysystemrecoded=10.00] | 1               | .313  |
| [bodysystemrecoded=11.00] | .               | .     |
| [Indicated dose=1]        | .               | .     |
| [Indicated dose=2]        | 1               | <.001 |
| [Indicated dose=3]        | .               | .     |
| [Sex=0]                   | 1               | .003  |
| [Sex=1]                   | 1               | .588  |
| [Sex=2]                   | 1               | .202  |
| [Sex=3]                   | .               | .     |
| Age (months)              | 1               | .005  |
| Weight@<br>(Scale)        | 1               | <.001 |

Dependent Variable: mg/kg

Model: (Intercept), bodysystemrecoded, Indicated dose, Sex, Age (months), Weight@

- a. Set to zero because this parameter is redundant.
- b. Maximum likelihood estimate.

## Generalized Linear Models

## Notes

|                        |                                |                                                                                                                                                                                                                                                                                                                                                                                                                                                  |
|------------------------|--------------------------------|--------------------------------------------------------------------------------------------------------------------------------------------------------------------------------------------------------------------------------------------------------------------------------------------------------------------------------------------------------------------------------------------------------------------------------------------------|
| Output Created         |                                | 15-JUL-2022 16:33:41                                                                                                                                                                                                                                                                                                                                                                                                                             |
| Comments               |                                |                                                                                                                                                                                                                                                                                                                                                                                                                                                  |
| Input                  | Data                           | /Users/bonniepurcell/Desktop/SPSS /SPSS Whole data set correct sex.sav                                                                                                                                                                                                                                                                                                                                                                           |
|                        | Active Dataset                 | DataSet1                                                                                                                                                                                                                                                                                                                                                                                                                                         |
|                        | Filter                         | CooksDistance <= 0.05 (FILTER)                                                                                                                                                                                                                                                                                                                                                                                                                   |
|                        | Weight                         | <none>                                                                                                                                                                                                                                                                                                                                                                                                                                           |
|                        | Split File                     | <none>                                                                                                                                                                                                                                                                                                                                                                                                                                           |
|                        | N of Rows in Working Data File | 1991                                                                                                                                                                                                                                                                                                                                                                                                                                             |
| Missing Value Handling | Definition of Missing          | User-defined missing values for factor, subject and within-subject variables are treated as missing.                                                                                                                                                                                                                                                                                                                                             |
|                        | Cases Used                     | Statistics are based on cases with valid data for all variables in the model.                                                                                                                                                                                                                                                                                                                                                                    |
| Weight Handling        |                                | not applicable                                                                                                                                                                                                                                                                                                                                                                                                                                   |
| Syntax                 |                                | <pre> GENLIN mgkg BY Indicateddose Sex bodysystemrecoded (ORDER=ASCENDING) WITH Agemonths Weight@ /MODEL bodysystemrecoded Indicateddose Sex Agemonths Weight@ INTERCEPT=YES DISTRIBUTION=NORMAL LINK=IDENTITY /CRITERIA SCALE=MLE COVB=MODEL PCONVERGE=1E-006 (ABSOLUTE) SINGULAR=1E-012 ANALYSISTYPE=3(LR) CILEVEL=95 CITYPE=WALD LIKELIHOOD=FULL /MISSING CLASSMISSING=EXCLUDE /PRINT CPS DESCRIPTIVES MODELINFO FIT SUMMARY SOLUTION. </pre> |
| Resources              | Processor Time                 | 00:00:00.64                                                                                                                                                                                                                                                                                                                                                                                                                                      |
|                        | Elapsed Time                   | 00:00:01.00                                                                                                                                                                                                                                                                                                                                                                                                                                      |

### Model Information

|                          |          |
|--------------------------|----------|
| Dependent Variable       | mg/kg    |
| Probability Distribution | Normal   |
| Link Function            | Identity |

### Case Processing Summary

|          | N    | Percent |
|----------|------|---------|
| Included | 1879 | 94.4%   |
| Excluded | 112  | 5.6%    |
| Total    | 1991 | 100.0%  |

### Categorical Variable Information

|                   |                | N      | Percent |
|-------------------|----------------|--------|---------|
| Factor            | Indicated dose | 1      | 0.5%    |
|                   |                | 2      | 95.4%   |
|                   |                | 3      | 4.0%    |
|                   |                | Total  | 100.0%  |
| Sex               | 0              | 6.0%   |         |
|                   | 1              | 39.1%  |         |
|                   | 2              | 10.8%  |         |
|                   | 3              | 44.1%  |         |
|                   | Total          | 100.0% |         |
| bodysystemrecoded | 2.00           | 1.3%   |         |
|                   | 3.00           | 4.2%   |         |
|                   | 4.00           | 1.1%   |         |
|                   | 5.00           | 3.2%   |         |
|                   | 6.00           | 1.6%   |         |
|                   | 7.00           | 0.5%   |         |
|                   | 8.00           | 0.2%   |         |
|                   | 10.00          | 0.3%   |         |
|                   | 11.00          | 87.4%  |         |
|                   | Total          | 100.0% |         |

### Continuous Variable Information

|                    |              | N    | Minimum    | Maximum    | Mean       |
|--------------------|--------------|------|------------|------------|------------|
| Dependent Variable | mg/kg        | 1879 | .032722513 | 3.88349515 | .906831477 |
| Covariate          | Age (months) | 1879 | 2          | 220        | 75.38      |
|                    | Weight®      | 1879 | 1.56       | 90.00      | 19.3223    |

### Continuous Variable Information

|                    |              | Std. Deviation |
|--------------------|--------------|----------------|
| Dependent Variable | mg/kg        | .487697711     |
| Covariate          | Age (months) | 49.433         |
|                    | Weight®      | 12.57661       |

### Goodness of Fit<sup>a</sup>

|                                      | Value     | df   | Value/df |
|--------------------------------------|-----------|------|----------|
| Deviance                             | 398.163   | 1864 | .214     |
| Scaled Deviance                      | 1879.000  | 1864 |          |
| Pearson Chi-Square                   | 398.163   | 1864 | .214     |
| Scaled Pearson Chi-Square            | 1879.000  | 1864 |          |
| Log Likelihood <sup>b</sup>          | -1208.425 |      |          |
| Akaike's Information Criterion (AIC) | 2448.851  |      |          |
| Finite Sample Corrected AIC (AICC)   | 2449.143  |      |          |
| Bayesian Information Criterion (BIC) | 2537.467  |      |          |
| Consistent AIC (CAIC)                | 2553.467  |      |          |

Dependent Variable: mg/kg

Model: (Intercept), bodysystemrecoded, Indicated dose, Sex, Age (months), Weight<sup>®</sup>

- a. Information criteria are in smaller-is-better form.
- b. The full log likelihood function is displayed and used in computing information criteria.

### Omnibus Test<sup>a</sup>

| Likelihood Ratio Chi-Square | df | Sig. |
|-----------------------------|----|------|
| 216.052                     | 14 | .000 |

Dependent Variable: mg/kg

Model: (Intercept), bodysystemrecoded, Indicated dose, Sex, Age (months), Weight<sup>®</sup>

- a. Compares the fitted model against the intercept-only...

### Tests of Model Effects

| Source              | Likelihood Ratio Chi-Square | Type III |       |
|---------------------|-----------------------------|----------|-------|
|                     |                             | df       | Sig.  |
| (Intercept)         | 346.080                     | 1        | .000  |
| bodysystemrecoded   | 32.941                      | 7        | <.001 |
| Indicated dose      | 40.318                      | 1        | <.001 |
| Sex                 | 9.432                       | 3        | .024  |
| Age (months)        | 7.808                       | 1        | .005  |
| Weight <sup>®</sup> | 30.802                      | 1        | <.001 |

Dependent Variable: mg/kg

Model: (Intercept), bodysystemrecoded, Indicated dose, Sex, Age (months), Weight<sup>®</sup>

### Parameter Estimates

| Parameter                 | B                 | Std. Error | 95% Wald Confidence Interval |       | Hypothesis Test |
|---------------------------|-------------------|------------|------------------------------|-------|-----------------|
|                           |                   |            | Lower                        | Upper | Wald Chi-Square |
| (Intercept)               | 1.458             | .0772      | 1.306                        | 1.609 | 356.981         |
| [bodysystemrecoded=2.00]  | .109              | .0948      | -.077                        | .295  | 1.326           |
| [bodysystemrecoded=3.00]  | .040              | .0549      | -.068                        | .147  | .526            |
| [bodysystemrecoded=4.00]  | .132              | .1019      | -.068                        | .332  | 1.678           |
| [bodysystemrecoded=5.00]  | .291              | .0638      | .166                         | .416  | 20.752          |
| [bodysystemrecoded=6.00]  | .328              | .1084      | .115                         | .540  | 9.138           |
| [bodysystemrecoded=7.00]  | -1.020            | .1627      | -1.339                       | -.701 | 39.306          |
| [bodysystemrecoded=8.00]  | -.396             | .2332      | -.853                        | .061  | 2.889           |
| [bodysystemrecoded=10.00] | .190              | .1885      | -.179                        | .560  | 1.020           |
| [bodysystemrecoded=11.00] | 0 <sup>a</sup>    | .          | .                            | .     | .               |
| [Indicated dose=1]        | 0 <sup>a</sup>    | .          | .                            | .     | .               |
| [Indicated dose=2]        | -.461             | .0722      | -.602                        | -.319 | 40.754          |
| [Indicated dose=3]        | 0 <sup>a</sup>    | .          | .                            | .     | .               |
| [Sex=0]                   | .137              | .0465      | .046                         | .228  | 8.652           |
| [Sex=1]                   | .013              | .0234      | -.033                        | .059  | .294            |
| [Sex=2]                   | .047              | .0366      | -.025                        | .118  | 1.627           |
| [Sex=3]                   | 0 <sup>a</sup>    | .          | .                            | .     | .               |
| Age (months)              | -.001             | .0002      | -.001                        | .000  | 7.824           |
| Weight@                   | -.005             | .0009      | -.007                        | -.003 | 31.056          |
| (Scale)                   | .212 <sup>b</sup> | .0069      | .199                         | .226  |                 |

## Parameter Estimates

| Parameter                 | Hypothesis Test |       |
|---------------------------|-----------------|-------|
|                           | df              | Sig.  |
| (Intercept)               | 1               | .000  |
| [bodysystemrecoded=2.00]  | 1               | .249  |
| [bodysystemrecoded=3.00]  | 1               | .468  |
| [bodysystemrecoded=4.00]  | 1               | .195  |
| [bodysystemrecoded=5.00]  | 1               | <.001 |
| [bodysystemrecoded=6.00]  | 1               | .003  |
| [bodysystemrecoded=7.00]  | 1               | <.001 |
| [bodysystemrecoded=8.00]  | 1               | .089  |
| [bodysystemrecoded=10.00] | 1               | .313  |
| [bodysystemrecoded=11.00] | .               | .     |
| [Indicated dose=1]        | .               | .     |
| [Indicated dose=2]        | 1               | <.001 |
| [Indicated dose=3]        | .               | .     |
| [Sex=0]                   | 1               | .003  |
| [Sex=1]                   | 1               | .588  |
| [Sex=2]                   | 1               | .202  |
| [Sex=3]                   | .               | .     |
| Age (months)              | 1               | .005  |
| Weight <sup>a</sup>       | 1               | <.001 |
| (Scale)                   |                 |       |

Dependent Variable: mg/kg

Model: (Intercept), bodysystemrecoded, Indicated dose, Sex, Age (months), Weight<sup>a</sup>

- a. Set to zero because this parameter is redundant.
- b. Maximum likelihood estimate.

## Generalized Linear Models



## Notes

|                        |                                |                                                                                                                                                                                                                                                                                                                                                                                                                                             |
|------------------------|--------------------------------|---------------------------------------------------------------------------------------------------------------------------------------------------------------------------------------------------------------------------------------------------------------------------------------------------------------------------------------------------------------------------------------------------------------------------------------------|
| Output Created         |                                | 15-JUL-2022 16:34:44                                                                                                                                                                                                                                                                                                                                                                                                                        |
| Comments               |                                |                                                                                                                                                                                                                                                                                                                                                                                                                                             |
| Input                  | Data                           | /Users/bonniepurcell/Desktop/SPSS /SPSS Whole data set correct sex.sav                                                                                                                                                                                                                                                                                                                                                                      |
|                        | Active Dataset                 | DataSet1                                                                                                                                                                                                                                                                                                                                                                                                                                    |
|                        | Filter                         | CooksDistance <= 0.05 (FILTER)                                                                                                                                                                                                                                                                                                                                                                                                              |
|                        | Weight                         | <none>                                                                                                                                                                                                                                                                                                                                                                                                                                      |
|                        | Split File                     | <none>                                                                                                                                                                                                                                                                                                                                                                                                                                      |
|                        | N of Rows in Working Data File | 1991                                                                                                                                                                                                                                                                                                                                                                                                                                        |
| Missing Value Handling | Definition of Missing          | User-defined missing values for factor, subject and within-subject variables are treated as missing.                                                                                                                                                                                                                                                                                                                                        |
|                        | Cases Used                     | Statistics are based on cases with valid data for all variables in the model.                                                                                                                                                                                                                                                                                                                                                               |
| Weight Handling        |                                | not applicable                                                                                                                                                                                                                                                                                                                                                                                                                              |
| Syntax                 |                                | <pre> GENLIN mgkg BY Indicateddose Sex bodysystemrecoded (ORDER=DATA) WITH Agemonths Weight@ /MODEL bodysystemrecoded Indicateddose Sex Agemonths Weight@ INTERCEPT=YES DISTRIBUTION=NORMAL LINK=IDENTITY /CRITERIA SCALE=MLE COVB=MODEL PCONVERGE=1E-006 (ABSOLUTE) SINGULAR=1E-012 ANALYSISTYPE=3(LR) CILEVEL=95 CITYPE=WALD LIKELIHOOD=FULL /MISSING CLASSMISSING=EXCLUDE /PRINT CPS DESCRIPTIVES MODELINFO FIT SUMMARY SOLUTION. </pre> |
| Resources              | Processor Time                 | 00:00:00.58                                                                                                                                                                                                                                                                                                                                                                                                                                 |
|                        | Elapsed Time                   | 00:00:01.00                                                                                                                                                                                                                                                                                                                                                                                                                                 |

### Model Information

|                          |          |
|--------------------------|----------|
| Dependent Variable       | mg/kg    |
| Probability Distribution | Normal   |
| Link Function            | Identity |

### Case Processing Summary

|          | N    | Percent |
|----------|------|---------|
| Included | 1879 | 94.4%   |
| Excluded | 112  | 5.6%    |
| Total    | 1991 | 100.0%  |

### Categorical Variable Information

|                   |                | N     | Percent |        |
|-------------------|----------------|-------|---------|--------|
| Factor            | Indicated dose | 2     | 1793    | 95.4%  |
|                   |                | 3     | 76      | 4.0%   |
|                   |                | 1     | 10      | 0.5%   |
|                   |                | Total | 1879    | 100.0% |
| Sex               |                | 3     | 829     | 44.1%  |
|                   |                | 0     | 113     | 6.0%   |
|                   |                | 1     | 734     | 39.1%  |
|                   |                | 2     | 203     | 10.8%  |
|                   |                | Total | 1879    | 100.0% |
| bodysystemrecoded |                | 11.00 | 1643    | 87.4%  |
|                   |                | 6.00  | 31      | 1.6%   |
|                   |                | 3.00  | 79      | 4.2%   |
|                   |                | 2.00  | 24      | 1.3%   |
|                   |                | 5.00  | 61      | 3.2%   |
|                   |                | 10.00 | 6       | 0.3%   |
|                   |                | 8.00  | 4       | 0.2%   |
|                   |                | 4.00  | 21      | 1.1%   |
|                   |                | 7.00  | 10      | 0.5%   |
|                   |                | Total | 1879    | 100.0% |

### Continuous Variable Information

|                    |              | N    | Minimum    | Maximum    | Mean       |
|--------------------|--------------|------|------------|------------|------------|
| Dependent Variable | mg/kg        | 1879 | .032722513 | 3.88349515 | .906831477 |
| Covariate          | Age (months) | 1879 | 2          | 220        | 75.38      |
|                    | Weight®      | 1879 | 1.56       | 90.00      | 19.3223    |

### Continuous Variable Information

|                    |              | Std. Deviation |
|--------------------|--------------|----------------|
| Dependent Variable | mg/kg        | .487697711     |
| Covariate          | Age (months) | 49.433         |
|                    | Weight®      | 12.57661       |

### Goodness of Fit<sup>a</sup>

|                                      | Value     | df   | Value/df |
|--------------------------------------|-----------|------|----------|
| Deviance                             | 398.163   | 1864 | .214     |
| Scaled Deviance                      | 1879.000  | 1864 |          |
| Pearson Chi-Square                   | 398.163   | 1864 | .214     |
| Scaled Pearson Chi-Square            | 1879.000  | 1864 |          |
| Log Likelihood <sup>b</sup>          | -1208.425 |      |          |
| Akaike's Information Criterion (AIC) | 2448.851  |      |          |
| Finite Sample Corrected AIC (AICC)   | 2449.143  |      |          |
| Bayesian Information Criterion (BIC) | 2537.467  |      |          |
| Consistent AIC (CAIC)                | 2553.467  |      |          |

Dependent Variable: mg/kg

Model: (Intercept), bodysystemrecoded, Indicated dose, Sex, Age (months), Weight<sup>®</sup>

- a. Information criteria are in smaller-is-better form.
- b. The full log likelihood function is displayed and used in computing information criteria.

### Omnibus Test<sup>a</sup>

| Likelihood Ratio Chi-Square | df | Sig. |
|-----------------------------|----|------|
| 216.052                     | 14 | .000 |

Dependent Variable: mg/kg

Model: (Intercept), bodysystemrecoded, Indicated dose, Sex, Age (months), Weight<sup>®</sup>

- a. Compares the fitted model against the intercept-only...

### Tests of Model Effects

| Source              | Likelihood Ratio Chi-Square | Type III |       |
|---------------------|-----------------------------|----------|-------|
|                     |                             | df       | Sig.  |
| (Intercept)         | 346.080                     | 1        | .000  |
| bodysystemrecoded   | 32.941                      | 7        | <.001 |
| Indicated dose      | 40.318                      | 1        | <.001 |
| Sex                 | 9.432                       | 3        | .024  |
| Age (months)        | 7.808                       | 1        | .005  |
| Weight <sup>®</sup> | 30.802                      | 1        | <.001 |

Dependent Variable: mg/kg

Model: (Intercept), bodysystemrecoded, Indicated dose, Sex, Age (months), Weight<sup>®</sup>

### Parameter Estimates

| Parameter                 | B                 | Std. Error | 95% Wald Confidence Interval |       | Hypothesis Test |
|---------------------------|-------------------|------------|------------------------------|-------|-----------------|
|                           |                   |            | Lower                        | Upper | Wald Chi-Square |
| (Intercept)               | .484              | .1525      | .185                         | .783  | 10.087          |
| [bodysystemrecoded=11.00] | 1.020             | .1627      | .701                         | 1.339 | 39.306          |
| [bodysystemrecoded=6.00]  | 1.348             | .1676      | 1.019                        | 1.676 | 64.676          |
| [bodysystemrecoded=3.00]  | 1.060             | .1706      | .726                         | 1.394 | 38.592          |
| [bodysystemrecoded=2.00]  | 1.129             | .1879      | .761                         | 1.497 | 36.137          |
| [bodysystemrecoded=5.00]  | 1.311             | .1656      | .986                         | 1.635 | 62.679          |
| [bodysystemrecoded=10.00] | 1.210             | .2491      | .722                         | 1.699 | 23.622          |
| [bodysystemrecoded=8.00]  | .624              | .2748      | .085                         | 1.162 | 5.154           |
| [bodysystemrecoded=4.00]  | 1.152             | .1911      | .777                         | 1.527 | 36.337          |
| [bodysystemrecoded=7.00]  | 0 <sup>a</sup>    | .          | .                            | .     | .               |
| [Indicated dose=2]        | -.461             | .0722      | -.602                        | -.319 | 40.754          |
| [Indicated dose=3]        | 0 <sup>a</sup>    | .          | .                            | .     | .               |
| [Indicated dose=1]        | 0 <sup>a</sup>    | .          | .                            | .     | .               |
| [Sex=3]                   | -.047             | .0366      | -.118                        | .025  | 1.627           |
| [Sex=0]                   | .090              | .0543      | -.016                        | .197  | 2.756           |
| [Sex=1]                   | -.034             | .0371      | -.107                        | .039  | .839            |
| [Sex=2]                   | 0 <sup>a</sup>    | .          | .                            | .     | .               |
| Age (months)              | -.001             | .0002      | -.001                        | .000  | 7.824           |
| Weight@                   | -.005             | .0009      | -.007                        | -.003 | 31.056          |
| (Scale)                   | .212 <sup>b</sup> | .0069      | .199                         | .226  |                 |

## Parameter Estimates

| Parameter                 | Hypothesis Test |       |
|---------------------------|-----------------|-------|
|                           | df              | Sig.  |
| (Intercept)               | 1               | .001  |
| [bodysystemrecoded=11.00] | 1               | <.001 |
| [bodysystemrecoded=6.00]  | 1               | <.001 |
| [bodysystemrecoded=3.00]  | 1               | <.001 |
| [bodysystemrecoded=2.00]  | 1               | <.001 |
| [bodysystemrecoded=5.00]  | 1               | <.001 |
| [bodysystemrecoded=10.00] | 1               | <.001 |
| [bodysystemrecoded=8.00]  | 1               | .023  |
| [bodysystemrecoded=4.00]  | 1               | <.001 |
| [bodysystemrecoded=7.00]  | .               | .     |
| [Indicated dose=2]        | 1               | <.001 |
| [Indicated dose=3]        | .               | .     |
| [Indicated dose=1]        | .               | .     |
| [Sex=3]                   | 1               | .202  |
| [Sex=0]                   | 1               | .097  |
| [Sex=1]                   | 1               | .360  |
| [Sex=2]                   | .               | .     |
| Age (months)              | 1               | .005  |
| Weight@<br>(Scale)        | 1               | <.001 |

Dependent Variable: mg/kg

Model: (Intercept), bodysystemrecoded, Indicated dose, Sex, Age (months), Weight®

- a. Set to zero because this parameter is redundant.
- b. Maximum likelihood estimate.

## Generalized Linear Models

## Notes

|                        |                                |                                                                                                                                                                                                                                                                                                                                                                                                                                                  |
|------------------------|--------------------------------|--------------------------------------------------------------------------------------------------------------------------------------------------------------------------------------------------------------------------------------------------------------------------------------------------------------------------------------------------------------------------------------------------------------------------------------------------|
| Output Created         |                                | 15-JUL-2022 16:35:57                                                                                                                                                                                                                                                                                                                                                                                                                             |
| Comments               |                                |                                                                                                                                                                                                                                                                                                                                                                                                                                                  |
| Input                  | Data                           | /Users/bonniepurcell/Desktop/SPSS /SPSS Whole data set correct sex.sav                                                                                                                                                                                                                                                                                                                                                                           |
|                        | Active Dataset                 | DataSet1                                                                                                                                                                                                                                                                                                                                                                                                                                         |
|                        | Filter                         | CooksDistance <= 0.05 (FILTER)                                                                                                                                                                                                                                                                                                                                                                                                                   |
|                        | Weight                         | <none>                                                                                                                                                                                                                                                                                                                                                                                                                                           |
|                        | Split File                     | <none>                                                                                                                                                                                                                                                                                                                                                                                                                                           |
|                        | N of Rows in Working Data File | 1991                                                                                                                                                                                                                                                                                                                                                                                                                                             |
| Missing Value Handling | Definition of Missing          | User-defined missing values for factor, subject and within-subject variables are treated as missing.                                                                                                                                                                                                                                                                                                                                             |
|                        | Cases Used                     | Statistics are based on cases with valid data for all variables in the model.                                                                                                                                                                                                                                                                                                                                                                    |
| Weight Handling        |                                | not applicable                                                                                                                                                                                                                                                                                                                                                                                                                                   |
| Syntax                 |                                | <pre> GENLIN mgkg BY Indicateddose Sex bodysystemrecoded (ORDER=ASCENDING) WITH Agemonths Weight@ /MODEL bodysystemrecoded Indicateddose Sex Agemonths Weight@ INTERCEPT=YES DISTRIBUTION=NORMAL LINK=IDENTITY /CRITERIA SCALE=MLE COVB=MODEL PCONVERGE=1E-006 (ABSOLUTE) SINGULAR=1E-012 ANALYSISTYPE=3(LR) CILEVEL=95 CITYPE=WALD LIKELIHOOD=FULL /MISSING CLASSMISSING=EXCLUDE /PRINT CPS DESCRIPTIVES MODELINFO FIT SUMMARY SOLUTION. </pre> |
| Resources              | Processor Time                 | 00:00:00.63                                                                                                                                                                                                                                                                                                                                                                                                                                      |
|                        | Elapsed Time                   | 00:00:01.00                                                                                                                                                                                                                                                                                                                                                                                                                                      |

### Model Information

|                          |          |
|--------------------------|----------|
| Dependent Variable       | mg/kg    |
| Probability Distribution | Normal   |
| Link Function            | Identity |

### Case Processing Summary

|          | N    | Percent |
|----------|------|---------|
| Included | 1879 | 94.4%   |
| Excluded | 112  | 5.6%    |
| Total    | 1991 | 100.0%  |

### Categorical Variable Information

|                   |                | N      | Percent |
|-------------------|----------------|--------|---------|
| Factor            | Indicated dose | 1      | 0.5%    |
|                   |                | 2      | 95.4%   |
|                   |                | 3      | 4.0%    |
|                   |                | Total  | 100.0%  |
| Sex               | 0              | 6.0%   |         |
|                   | 1              | 39.1%  |         |
|                   | 2              | 10.8%  |         |
|                   | 3              | 44.1%  |         |
|                   | Total          | 100.0% |         |
| bodysystemrecoded | 2.00           | 1.3%   |         |
|                   | 3.00           | 4.2%   |         |
|                   | 4.00           | 1.1%   |         |
|                   | 5.00           | 3.2%   |         |
|                   | 6.00           | 1.6%   |         |
|                   | 7.00           | 0.5%   |         |
|                   | 8.00           | 0.2%   |         |
|                   | 10.00          | 0.3%   |         |
|                   | 11.00          | 87.4%  |         |
|                   | Total          | 100.0% |         |

### Continuous Variable Information

|                    |              | N    | Minimum    | Maximum    | Mean       |
|--------------------|--------------|------|------------|------------|------------|
| Dependent Variable | mg/kg        | 1879 | .032722513 | 3.88349515 | .906831477 |
| Covariate          | Age (months) | 1879 | 2          | 220        | 75.38      |
|                    | Weight®      | 1879 | 1.56       | 90.00      | 19.3223    |

### Continuous Variable Information

|                    |              | Std. Deviation |
|--------------------|--------------|----------------|
| Dependent Variable | mg/kg        | .487697711     |
| Covariate          | Age (months) | 49.433         |
|                    | Weight®      | 12.57661       |

### Goodness of Fit<sup>a</sup>

|                                      | Value     | df   | Value/df |
|--------------------------------------|-----------|------|----------|
| Deviance                             | 398.163   | 1864 | .214     |
| Scaled Deviance                      | 1879.000  | 1864 |          |
| Pearson Chi-Square                   | 398.163   | 1864 | .214     |
| Scaled Pearson Chi-Square            | 1879.000  | 1864 |          |
| Log Likelihood <sup>b</sup>          | -1208.425 |      |          |
| Akaike's Information Criterion (AIC) | 2448.851  |      |          |
| Finite Sample Corrected AIC (AICC)   | 2449.143  |      |          |
| Bayesian Information Criterion (BIC) | 2537.467  |      |          |
| Consistent AIC (CAIC)                | 2553.467  |      |          |

Dependent Variable: mg/kg

Model: (Intercept), bodysystemrecoded, Indicated dose, Sex, Age (months), Weight<sup>®</sup>

- Information criteria are in smaller-is-better form.
- The full log likelihood function is displayed and used in computing information criteria.

### Omnibus Test<sup>a</sup>

| Likelihood Ratio Chi-Square | df | Sig. |
|-----------------------------|----|------|
| 216.052                     | 14 | .000 |

Dependent Variable: mg/kg

Model: (Intercept), bodysystemrecoded, Indicated dose, Sex, Age (months), Weight<sup>®</sup>

- Compares the fitted model against the intercept-only...

### Tests of Model Effects

| Source              | Likelihood Ratio Chi-Square | Type III |       |
|---------------------|-----------------------------|----------|-------|
|                     |                             | df       | Sig.  |
| (Intercept)         | 346.080                     | 1        | .000  |
| bodysystemrecoded   | 32.941                      | 7        | <.001 |
| Indicated dose      | 40.318                      | 1        | <.001 |
| Sex                 | 9.432                       | 3        | .024  |
| Age (months)        | 7.808                       | 1        | .005  |
| Weight <sup>®</sup> | 30.802                      | 1        | <.001 |

Dependent Variable: mg/kg

Model: (Intercept), bodysystemrecoded, Indicated dose, Sex, Age (months), Weight<sup>®</sup>



### Parameter Estimates

| Parameter                 | B                 | Std. Error | 95% Wald Confidence Interval |       | Hypothesis Test |
|---------------------------|-------------------|------------|------------------------------|-------|-----------------|
|                           |                   |            | Lower                        | Upper | Wald Chi-Square |
| (Intercept)               | 1.458             | .0772      | 1.306                        | 1.609 | 356.981         |
| [bodysystemrecoded=2.00]  | .109              | .0948      | -.077                        | .295  | 1.326           |
| [bodysystemrecoded=3.00]  | .040              | .0549      | -.068                        | .147  | .526            |
| [bodysystemrecoded=4.00]  | .132              | .1019      | -.068                        | .332  | 1.678           |
| [bodysystemrecoded=5.00]  | .291              | .0638      | .166                         | .416  | 20.752          |
| [bodysystemrecoded=6.00]  | .328              | .1084      | .115                         | .540  | 9.138           |
| [bodysystemrecoded=7.00]  | -1.020            | .1627      | -1.339                       | -.701 | 39.306          |
| [bodysystemrecoded=8.00]  | -.396             | .2332      | -.853                        | .061  | 2.889           |
| [bodysystemrecoded=10.00] | .190              | .1885      | -.179                        | .560  | 1.020           |
| [bodysystemrecoded=11.00] | 0 <sup>a</sup>    | .          | .                            | .     | .               |
| [Indicated dose=1]        | 0 <sup>a</sup>    | .          | .                            | .     | .               |
| [Indicated dose=2]        | -.461             | .0722      | -.602                        | -.319 | 40.754          |
| [Indicated dose=3]        | 0 <sup>a</sup>    | .          | .                            | .     | .               |
| [Sex=0]                   | .137              | .0465      | .046                         | .228  | 8.652           |
| [Sex=1]                   | .013              | .0234      | -.033                        | .059  | .294            |
| [Sex=2]                   | .047              | .0366      | -.025                        | .118  | 1.627           |
| [Sex=3]                   | 0 <sup>a</sup>    | .          | .                            | .     | .               |
| Age (months)              | -.001             | .0002      | -.001                        | .000  | 7.824           |
| Weight@                   | -.005             | .0009      | -.007                        | -.003 | 31.056          |
| (Scale)                   | .212 <sup>b</sup> | .0069      | .199                         | .226  |                 |

## Parameter Estimates

### Hypothesis Test

| Parameter                 | df | Sig.  |
|---------------------------|----|-------|
| (Intercept)               | 1  | .000  |
| [bodysystemrecoded=2.00]  | 1  | .249  |
| [bodysystemrecoded=3.00]  | 1  | .468  |
| [bodysystemrecoded=4.00]  | 1  | .195  |
| [bodysystemrecoded=5.00]  | 1  | <.001 |
| [bodysystemrecoded=6.00]  | 1  | .003  |
| [bodysystemrecoded=7.00]  | 1  | <.001 |
| [bodysystemrecoded=8.00]  | 1  | .089  |
| [bodysystemrecoded=10.00] | 1  | .313  |
| [bodysystemrecoded=11.00] | .  | .     |
| [Indicated dose=1]        | .  | .     |
| [Indicated dose=2]        | 1  | <.001 |
| [Indicated dose=3]        | .  | .     |
| [Sex=0]                   | 1  | .003  |
| [Sex=1]                   | 1  | .588  |
| [Sex=2]                   | 1  | .202  |
| [Sex=3]                   | .  | .     |
| Age (months)              | 1  | .005  |
| Weight®                   | 1  | <.001 |
| (Scale)                   |    |       |

Dependent Variable: mg/kg

Model: (Intercept), bodysystemrecoded, Indicated dose, Sex, Age (months), Weight®

- a. Set to zero because this parameter is redundant.
- b. Maximum likelihood estimate.

## Regression

### Notes

|                        |                                               |                                                                                                                                                                                                                                           |
|------------------------|-----------------------------------------------|-------------------------------------------------------------------------------------------------------------------------------------------------------------------------------------------------------------------------------------------|
| Output Created         |                                               | 15-JUL-2022 17:02:45                                                                                                                                                                                                                      |
| Comments               |                                               |                                                                                                                                                                                                                                           |
| Input                  | Data                                          | /Users/bonniepurcell/Desktop/SPSS /SPSS Whole data set correct sex.sav                                                                                                                                                                    |
|                        | Active Dataset                                | DataSet1                                                                                                                                                                                                                                  |
|                        | Filter                                        | CooksDistance <= 0.05 (FILTER)                                                                                                                                                                                                            |
|                        | Weight                                        | <none>                                                                                                                                                                                                                                    |
|                        | Split File                                    | <none>                                                                                                                                                                                                                                    |
|                        | N of Rows in Working Data File                | 1991                                                                                                                                                                                                                                      |
| Missing Value Handling | Definition of Missing                         | User-defined missing values are treated as missing.                                                                                                                                                                                       |
|                        | Cases Used                                    | Statistics are based on cases with no missing values for any variable used.                                                                                                                                                               |
| Syntax                 |                                               | REGRESSION<br>/MISSING LISTWISE<br>/STATISTICS COEFF<br>OUTS CI(95) R ANOVA<br>CHANGE<br>/CRITERIA=PIN(.05)<br>POUT(.10)<br>/NOORIGIN<br>/DEPENDENT mgkg<br>/METHOD=ENTER<br>Agemonths Weight@<br>Indicateddose Sex<br>bodysystemrecoded. |
| Resources              | Processor Time                                | 00:00:00.06                                                                                                                                                                                                                               |
|                        | Elapsed Time                                  | 00:00:00.00                                                                                                                                                                                                                               |
|                        | Memory Required                               | 7968 bytes                                                                                                                                                                                                                                |
|                        | Additional Memory Required for Residual Plots | 0 bytes                                                                                                                                                                                                                                   |

### Variables Entered/Removed<sup>a</sup>

| Model | Variables Entered                                                          | Variables Removed | Method |
|-------|----------------------------------------------------------------------------|-------------------|--------|
| 1     | bodysystemrecoded, Sex, Weight@, Indicated dose, Age (months) <sup>b</sup> | .                 | Enter  |

a. Dependent Variable: mg/kg

b. All requested variables entered.

### Model Summary

| Model | R                 | R Square | Adjusted R Square | Std. Error of the Estimate | Change Statistics |          |
|-------|-------------------|----------|-------------------|----------------------------|-------------------|----------|
|       |                   |          |                   |                            | R Square Change   | F Change |
| 1     | .309 <sup>a</sup> | .095     | .093              | .464476551                 | .095              | 39.494   |

### Model Summary

| Model | Change Statistics |      |               |
|-------|-------------------|------|---------------|
|       | df1               | df2  | Sig. F Change |
| 1     | 5                 | 1873 | <.001         |

a. Predictors: (Constant), bodysystemrecoded, Sex, Weight®, Indicated dose, Age (months)

### ANOVA<sup>a</sup>

| Model |            | Sum of Squares | df   | Mean Square | F      | Sig.               |
|-------|------------|----------------|------|-------------|--------|--------------------|
| 1     | Regression | 42.602         | 5    | 8.520       | 39.494 | <.001 <sup>b</sup> |
|       | Residual   | 404.078        | 1873 | .216        |        |                    |
|       | Total      | 446.681        | 1878 |             |        |                    |

a. Dependent Variable: mg/kg

b. Predictors: (Constant), bodysystemrecoded, Sex, Weight®, Indicated dose, Age (months)

### Coefficients<sup>a</sup>

| Model |                   | Unstandardized Coefficients |            | Standardized Coefficients | t      | Sig.  |
|-------|-------------------|-----------------------------|------------|---------------------------|--------|-------|
|       |                   | B                           | Std. Error | Beta                      |        |       |
| 1     | (Constant)        | .053                        | .129       |                           | .408   | .683  |
|       | Age (months)      | -.001                       | .000       | -.073                     | -3.124 | .002  |
|       | Weight®           | -.005                       | .001       | -.120                     | -5.327 | <.001 |
|       | Indicated dose    | .593                        | .052       | .257                      | 11.488 | <.001 |
|       | Sex               | -.019                       | .010       | -.041                     | -1.841 | .066  |
|       | bodysystemrecoded | -.017                       | .005       | -.080                     | -3.415 | <.001 |

### Coefficients<sup>a</sup>

| Model |                   | 95.0% Confidence Interval for B |             |
|-------|-------------------|---------------------------------|-------------|
|       |                   | Lower Bound                     | Upper Bound |
| 1     | (Constant)        | -.201                           | .306        |
|       | Age (months)      | -.001                           | .000        |
|       | Weight®           | -.006                           | -.003       |
|       | Indicated dose    | .492                            | .695        |
|       | Sex               | -.039                           | .001        |
|       | bodysystemrecoded | -.027                           | -.007       |

a. Dependent Variable: mg/kg

## Generalized Linear Models

### Notes

|                        |                                |                                                                                                                                                                                                                                                                                                                                                                                                                                                                                                             |
|------------------------|--------------------------------|-------------------------------------------------------------------------------------------------------------------------------------------------------------------------------------------------------------------------------------------------------------------------------------------------------------------------------------------------------------------------------------------------------------------------------------------------------------------------------------------------------------|
| Output Created         |                                | 15-JUL-2022 17:06:38                                                                                                                                                                                                                                                                                                                                                                                                                                                                                        |
| Comments               |                                |                                                                                                                                                                                                                                                                                                                                                                                                                                                                                                             |
| Input                  | Data                           | /Users/bonniepurcell/Desktop/SPSS /SPSS Whole data set correct sex.sav                                                                                                                                                                                                                                                                                                                                                                                                                                      |
|                        | Active Dataset                 | DataSet1                                                                                                                                                                                                                                                                                                                                                                                                                                                                                                    |
|                        | Filter                         | CooksDistance <= 0.05 (FILTER)                                                                                                                                                                                                                                                                                                                                                                                                                                                                              |
|                        | Weight                         | <none>                                                                                                                                                                                                                                                                                                                                                                                                                                                                                                      |
|                        | Split File                     | <none>                                                                                                                                                                                                                                                                                                                                                                                                                                                                                                      |
|                        | N of Rows in Working Data File | 1991                                                                                                                                                                                                                                                                                                                                                                                                                                                                                                        |
| Missing Value Handling | Definition of Missing          | User-defined missing values for factor, subject and within-subject variables are treated as missing.                                                                                                                                                                                                                                                                                                                                                                                                        |
|                        | Cases Used                     | Statistics are based on cases with valid data for all variables in the model.                                                                                                                                                                                                                                                                                                                                                                                                                               |
| Weight Handling        |                                | not applicable                                                                                                                                                                                                                                                                                                                                                                                                                                                                                              |
| Syntax                 |                                | <pre> GENLIN mgkg BY Indicateddose Sex bodysystemrecoded (ORDER=ASCENDING) WITH Agemonths Weight@ /MODEL bodysystemrecoded Indicateddose Sex Agemonths Weight@ INTERCEPT=YES DISTRIBUTION=NORMAL LINK=IDENTITY /CRITERIA SCALE=MLE COVB=MODEL PCONVERGE=1E-006 (ABSOLUTE) SINGULAR=1E-012 ANALYSISTYPE=3(LR) CILEVEL=95 CITYPE=WALD LIKELIHOOD=FULL /MISSING CLASSMISSING=EXCLUDE /PRINT CPS DESCRIPTIVES MODELINFO FIT SUMMARY SOLUTION GEF /SAVE MEANPRED COOK RESID PEARSONRESID STDPEARSONRESID. </pre> |
| Resources              | Processor Time                 | 00:00:00.68                                                                                                                                                                                                                                                                                                                                                                                                                                                                                                 |
|                        | Elapsed Time                   | 00:00:01.00                                                                                                                                                                                                                                                                                                                                                                                                                                                                                                 |

### Notes

|                               |                                             |                      |
|-------------------------------|---------------------------------------------|----------------------|
| Variables Created or Modified | Predicted Value of the Mean of the Response | MeanPredicted_4      |
|                               | Raw Residual                                | Residual_4           |
|                               | Pearson Residual                            | PearsonResidual_4    |
|                               | Standardized Pearson Residual               | StdPearsonResidual_4 |
|                               | Cook's Distance                             | CooksDistance_3      |

### Model Information

|                          |          |
|--------------------------|----------|
| Dependent Variable       | mg/kg    |
| Probability Distribution | Normal   |
| Link Function            | Identity |

### Case Processing Summary

|          | N    | Percent |
|----------|------|---------|
| Included | 1879 | 94.4%   |
| Excluded | 112  | 5.6%    |
| Total    | 1991 | 100.0%  |

### Categorical Variable Information

| Factor            |       | N    | Percent |
|-------------------|-------|------|---------|
| Indicated dose    | 1     | 10   | 0.5%    |
|                   | 2     | 1793 | 95.4%   |
|                   | 3     | 76   | 4.0%    |
|                   | Total | 1879 | 100.0%  |
| Sex               | 0     | 113  | 6.0%    |
|                   | 1     | 734  | 39.1%   |
|                   | 2     | 203  | 10.8%   |
|                   | 3     | 829  | 44.1%   |
|                   | Total | 1879 | 100.0%  |
| bodysystemrecoded | 2.00  | 24   | 1.3%    |
|                   | 3.00  | 79   | 4.2%    |
|                   | 4.00  | 21   | 1.1%    |
|                   | 5.00  | 61   | 3.2%    |
|                   | 6.00  | 31   | 1.6%    |
|                   | 7.00  | 10   | 0.5%    |
|                   | 8.00  | 4    | 0.2%    |
|                   | 10.00 | 6    | 0.3%    |
|                   | 11.00 | 1643 | 87.4%   |
|                   | Total | 1879 | 100.0%  |

### Continuous Variable Information

|                    |              | N    | Minimum    | Maximum    | Mean       |
|--------------------|--------------|------|------------|------------|------------|
| Dependent Variable | mg/kg        | 1879 | .032722513 | 3.88349515 | .906831477 |
| Covariate          | Age (months) | 1879 | 2          | 220        | 75.38      |
|                    | Weight®      | 1879 | 1.56       | 90.00      | 19.3223    |

### Continuous Variable Information

|                    |              | Std. Deviation |
|--------------------|--------------|----------------|
| Dependent Variable | mg/kg        | .487697711     |
| Covariate          | Age (months) | 49.433         |
|                    | Weight®      | 12.57661       |

### Goodness of Fit<sup>a</sup>

|                                      | Value     | df   | Value/df |
|--------------------------------------|-----------|------|----------|
| Deviance                             | 398.163   | 1864 | .214     |
| Scaled Deviance                      | 1879.000  | 1864 |          |
| Pearson Chi-Square                   | 398.163   | 1864 | .214     |
| Scaled Pearson Chi-Square            | 1879.000  | 1864 |          |
| Log Likelihood <sup>b</sup>          | -1208.425 |      |          |
| Akaike's Information Criterion (AIC) | 2448.851  |      |          |
| Finite Sample Corrected AIC (AICC)   | 2449.143  |      |          |
| Bayesian Information Criterion (BIC) | 2537.467  |      |          |
| Consistent AIC (CAIC)                | 2553.467  |      |          |

Dependent Variable: mg/kg

Model: (Intercept), bodysystemrecoded, Indicated dose, Sex, Age (months), Weight®

- Information criteria are in smaller-is-better form.
- The full log likelihood function is displayed and used in computing information criteria.

### Omnibus Test<sup>a</sup>

| Likelihood Ratio Chi-Square | df | Sig. |
|-----------------------------|----|------|
| 216.052                     | 14 | .000 |

Dependent Variable: mg/kg

Model: (Intercept), bodysystemrecoded, Indicated dose, Sex, Age (months), Weight®

- Compares the fitted model against the intercept-only...

### Tests of Model Effects

| Source            | Likelihood<br>Ratio Chi-<br>Square | Type III |       |
|-------------------|------------------------------------|----------|-------|
|                   |                                    | df       | Sig.  |
| (Intercept)       | 346.080                            | 1        | .000  |
| bodysystemrecoded | 32.941                             | 7        | <.001 |
| Indicated dose    | 40.318                             | 1        | <.001 |
| Sex               | 9.432                              | 3        | .024  |
| Age (months)      | 7.808                              | 1        | .005  |
| Weight®           | 30.802                             | 1        | <.001 |

Dependent Variable: mg/kg

Model: (Intercept), bodysystemrecoded, Indicated dose, Sex, Age (months), Weight®

### Parameter Estimates

| Parameter                 | B                 | Std. Error | 95% Wald Confidence Interval |       | Hypothesis Test<br>Wald Chi-<br>Square |
|---------------------------|-------------------|------------|------------------------------|-------|----------------------------------------|
|                           |                   |            | Lower                        | Upper |                                        |
| (Intercept)               | 1.458             | .0772      | 1.306                        | 1.609 | 356.981                                |
| [bodysystemrecoded=2.00]  | .109              | .0948      | -.077                        | .295  | 1.326                                  |
| [bodysystemrecoded=3.00]  | .040              | .0549      | -.068                        | .147  | .526                                   |
| [bodysystemrecoded=4.00]  | .132              | .1019      | -.068                        | .332  | 1.678                                  |
| [bodysystemrecoded=5.00]  | .291              | .0638      | .166                         | .416  | 20.752                                 |
| [bodysystemrecoded=6.00]  | .328              | .1084      | .115                         | .540  | 9.138                                  |
| [bodysystemrecoded=7.00]  | -1.020            | .1627      | -1.339                       | -.701 | 39.306                                 |
| [bodysystemrecoded=8.00]  | -.396             | .2332      | -.853                        | .061  | 2.889                                  |
| [bodysystemrecoded=10.00] | .190              | .1885      | -.179                        | .560  | 1.020                                  |
| [bodysystemrecoded=11.00] | 0 <sup>a</sup>    | .          | .                            | .     | .                                      |
| [Indicated dose=1]        | 0 <sup>a</sup>    | .          | .                            | .     | .                                      |
| [Indicated dose=2]        | -.461             | .0722      | -.602                        | -.319 | 40.754                                 |
| [Indicated dose=3]        | 0 <sup>a</sup>    | .          | .                            | .     | .                                      |
| [Sex=0]                   | .137              | .0465      | .046                         | .228  | 8.652                                  |
| [Sex=1]                   | .013              | .0234      | -.033                        | .059  | .294                                   |
| [Sex=2]                   | .047              | .0366      | -.025                        | .118  | 1.627                                  |
| [Sex=3]                   | 0 <sup>a</sup>    | .          | .                            | .     | .                                      |
| Age (months)              | -.001             | .0002      | -.001                        | .000  | 7.824                                  |
| Weight®                   | -.005             | .0009      | -.007                        | -.003 | 31.056                                 |
| (Scale)                   | .212 <sup>b</sup> | .0069      | .199                         | .226  |                                        |



## Parameter Estimates

### Hypothesis Test

| Parameter                 | df | Sig.  |
|---------------------------|----|-------|
| (Intercept)               | 1  | .000  |
| [bodysystemrecoded=2.00]  | 1  | .249  |
| [bodysystemrecoded=3.00]  | 1  | .468  |
| [bodysystemrecoded=4.00]  | 1  | .195  |
| [bodysystemrecoded=5.00]  | 1  | <.001 |
| [bodysystemrecoded=6.00]  | 1  | .003  |
| [bodysystemrecoded=7.00]  | 1  | <.001 |
| [bodysystemrecoded=8.00]  | 1  | .089  |
| [bodysystemrecoded=10.00] | 1  | .313  |
| [bodysystemrecoded=11.00] | .  | .     |
| [Indicated dose=1]        | .  | .     |
| [Indicated dose=2]        | 1  | <.001 |
| [Indicated dose=3]        | .  | .     |
| [Sex=0]                   | 1  | .003  |
| [Sex=1]                   | 1  | .588  |
| [Sex=2]                   | 1  | .202  |
| [Sex=3]                   | .  | .     |
| Age (months)              | 1  | .005  |
| Weight®                   | 1  | <.001 |
| (Scale)                   |    |       |

Dependent Variable: mg/kg

Model: (Intercept), bodysystemrecoded, Indicated dose, Sex, Age (months), Weight®

- a. Set to zero because this parameter is redundant.
- b. Maximum likelihood estimate.

### General Estimable Function

| Parameter                 | Contrast |     |     |     |     |     |
|---------------------------|----------|-----|-----|-----|-----|-----|
|                           | L1       | L2  | L3  | L4  | L5  | L6  |
| (Intercept)               | 1        | 0   | 0   | 0   | 0   | 0   |
| [bodysystemrecoded=2.00]  | 0        | 1   | 0   | 0   | 0   | 0   |
| [bodysystemrecoded=3.00]  | 0        | 0   | 1   | 0   | 0   | 0   |
| [bodysystemrecoded=4.00]  | 0        | 0   | 0   | 1   | 0   | 0   |
| [bodysystemrecoded=5.00]  | 0        | 0   | 0   | 0   | 1   | 0   |
| [bodysystemrecoded=6.00]  | 0        | 0   | 0   | 0   | 0   | 1   |
| [bodysystemrecoded=7.00]  | 0        | 0   | 0   | 0   | 0   | 0   |
| [bodysystemrecoded=8.00]  | 0        | 0   | 0   | 0   | 0   | 0   |
| [bodysystemrecoded=10.00] | 0        | 0   | 0   | 0   | 0   | 0   |
| [bodysystemrecoded=11.00] | 1        | - 1 | - 1 | - 1 | - 1 | - 1 |
| [Indicated dose=1]        | 0        | 0   | 0   | 0   | 0   | 0   |
| [Indicated dose=2]        | 0        | 0   | 0   | 0   | 0   | 0   |
| [Indicated dose=3]        | 1        | 0   | 0   | 0   | 0   | 0   |
| [Sex=0]                   | 0        | 0   | 0   | 0   | 0   | 0   |
| [Sex=1]                   | 0        | 0   | 0   | 0   | 0   | 0   |
| [Sex=2]                   | 0        | 0   | 0   | 0   | 0   | 0   |
| [Sex=3]                   | 1        | 0   | 0   | 0   | 0   | 0   |
| Age (months)              | 0        | 0   | 0   | 0   | 0   | 0   |
| Weight®                   | 0        | 0   | 0   | 0   | 0   | 0   |

### General Estimable Function

| Parameter                 | Contrast |     |     |     |     |     |
|---------------------------|----------|-----|-----|-----|-----|-----|
|                           | L7       | L8  | L9  | L12 | L14 | L15 |
| (Intercept)               | 0        | 0   | 0   | 0   | 0   | 0   |
| [bodysystemrecoded=2.00]  | 0        | 0   | 0   | 0   | 0   | 0   |
| [bodysystemrecoded=3.00]  | 0        | 0   | 0   | 0   | 0   | 0   |
| [bodysystemrecoded=4.00]  | 0        | 0   | 0   | 0   | 0   | 0   |
| [bodysystemrecoded=5.00]  | 0        | 0   | 0   | 0   | 0   | 0   |
| [bodysystemrecoded=6.00]  | 0        | 0   | 0   | 0   | 0   | 0   |
| [bodysystemrecoded=7.00]  | 1        | 0   | 0   | 0   | 0   | 0   |
| [bodysystemrecoded=8.00]  | 0        | 1   | 0   | 0   | 0   | 0   |
| [bodysystemrecoded=10.00] | 0        | 0   | 1   | 0   | 0   | 0   |
| [bodysystemrecoded=11.00] | - 1      | - 1 | - 1 | 0   | 0   | 0   |
| [Indicated dose=1]        | 1        | 0   | 0   | 0   | 0   | 0   |
| [Indicated dose=2]        | 0        | 0   | 0   | 1   | 0   | 0   |
| [Indicated dose=3]        | - 1      | 0   | 0   | - 1 | 0   | 0   |
| [Sex=0]                   | 0        | 0   | 0   | 0   | 1   | 0   |
| [Sex=1]                   | 0        | 0   | 0   | 0   | 0   | 1   |
| [Sex=2]                   | 0        | 0   | 0   | 0   | 0   | 0   |
| [Sex=3]                   | 0        | 0   | 0   | 0   | - 1 | - 1 |
| Age (months)              | 0        | 0   | 0   | 0   | 0   | 0   |
| Weight®                   | 0        | 0   | 0   | 0   | 0   | 0   |

### General Estimable Function

| Parameter                 | Contrast |     |     |
|---------------------------|----------|-----|-----|
|                           | L16      | L18 | L19 |
| (Intercept)               | 0        | 0   | 0   |
| [bodysystemrecoded=2.00]  | 0        | 0   | 0   |
| [bodysystemrecoded=3.00]  | 0        | 0   | 0   |
| [bodysystemrecoded=4.00]  | 0        | 0   | 0   |
| [bodysystemrecoded=5.00]  | 0        | 0   | 0   |
| [bodysystemrecoded=6.00]  | 0        | 0   | 0   |
| [bodysystemrecoded=7.00]  | 0        | 0   | 0   |
| [bodysystemrecoded=8.00]  | 0        | 0   | 0   |
| [bodysystemrecoded=10.00] | 0        | 0   | 0   |
| [bodysystemrecoded=11.00] | 0        | 0   | 0   |
| [Indicated dose=1]        | 0        | 0   | 0   |
| [Indicated dose=2]        | 0        | 0   | 0   |
| [Indicated dose=3]        | 0        | 0   | 0   |
| [Sex=0]                   | 0        | 0   | 0   |
| [Sex=1]                   | 0        | 0   | 0   |
| [Sex=2]                   | 1        | 0   | 0   |
| [Sex=3]                   | - 1      | 0   | 0   |
| Age (months)              | 0        | 1   | 0   |
| Weight®                   | 0        | 0   | 1   |

Dependent Variable: mg/kg

Model: (Intercept), bodysystemrecoded, Indicated dose, Sex, Age (months), Weight®
